# Supplementary material for: Blue light photoredox-catalysed acetalation of alkynyl bromides
Source: Royal Society of Chemistry journal article supplement (doi:10.1039/c9ra06596b), 2019-01-01

## Blue Light Photoredox-Catalysed Acetalation of Alkynyl Bromides

Xue-Li Lyu, † Shi-Sheng Huang, † Hong-Jian Song, \*† Yu-Xiu Liu\*† and Qing-Min Wang\*†‡

†State Key Laboratory of Elemento-Organic Chemistry, Research Institute of Elemento-Organic Chemistry, College of Chemistry, Nankai University, Tianjin 300071, People's Republic of China.

‡Collaborative Innovation Center of Chemical Science and Engineering (Tianjin), Tianjin 300071, People's Republic of China.

### Table of contents

|                                                                                                              |    |
|--------------------------------------------------------------------------------------------------------------|----|
| <b>1. General Information</b> .....                                                                          | 2  |
| <b>2. Optimization of reaction conditions</b> .....                                                          | 2  |
| <b>2.1 Photocatalyst screening for the reaction</b> .....                                                    | 2  |
| <b>2.2 Solvent screening for the reaction</b> .....                                                          | 2  |
| <b>2.3 Base screening for the reaction</b> .....                                                             | 3  |
| <b>2.4 Leaving group screening for the reaction</b> .....                                                    | 4  |
| <b>2.5 Loading of 2 screening for the reaction</b> .....                                                     | 5  |
| <b>3. General procedure of compounds 1</b> .....                                                             | 5  |
| <b>3.1 General Procedure for the synthesis of 1</b> .....                                                    | 5  |
| <b>3.2 Procedure for the synthesis of 3-(bromoethynyl) thiophene</b> .....                                   | 7  |
| <b>3.3 Procedure for the synthesis of 3-(bromoethynyl) pyridine</b> .....                                    | 8  |
| <b>4. General procedure of compounds 2</b> .....                                                             | 8  |
| <b>5. General procedure of photocatalyst 4CzIPN</b> .....                                                    | 9  |
| <b>6. General procedure of compounds 3 and removal of the acetal group</b> .....                             | 10 |
| <b>General procedure of compounds 3</b> .....                                                                | 10 |
| <b>Removal of the acetal group</b> .....                                                                     | 10 |
| <b>7. Characterization of products</b> .....                                                                 | 11 |
| <b>8 Another proposed mechanism.</b> .....                                                                   | 21 |
| <b>9. References</b> .....                                                                                   | 22 |
| <b>10. Copies of <sup>1</sup>H NMR <sup>13</sup>C NMR and <sup>19</sup>F NMR spectra for compounds</b> ..... | 22 |

## 1. General Information

All reagents were used as received.  $^1\text{H}$  and  $^{13}\text{C}$  Nuclear Magnetic Resonance (NMR) spectra were recorded on a Bruker Avance 400 Ultrashield NMR spectrometers. Chemical shifts ( $\delta$ ) were given in parts per million (ppm) and were measured downfield from internal tetramethylsilane. High-resolution mass spectrometry (HRMS) data were obtained on an FTICR-MS instrument (Ionspec 7.0 T). The melting points were determined on an X-4 binocular microscope melting point apparatus (Beijing Tech Instruments Co., Beijing, China) and are uncorrected. Conversion was monitored by thin layer chromatography (TLC). Flash column chromatography was performed over silica gel (100-200 mesh).

## 2. Optimization of reaction conditions

### 2.1 Photocatalyst screening for the reaction

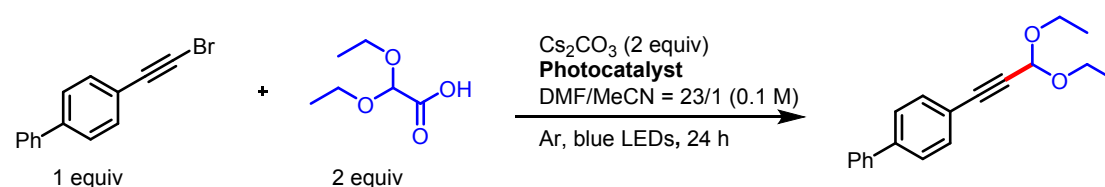

Table S1. Photocatalyst screening for the reaction

| Entry | Photocatalyst                                                               | Loading of Photocatalyst | Yield/%   |
|-------|-----------------------------------------------------------------------------|--------------------------|-----------|
| 1     | $\text{Ru}(\text{bpy})_3\text{Cl}_2 \cdot 6\text{H}_2\text{O}$              | 2 mol %                  | 0         |
| 2     | $\text{Ru}(\text{bpy})_3(\text{PF}_6)_2$                                    | 2 mol %                  | 0         |
| 3     | Fluorescein                                                                 | 10 mol %                 | 0         |
| 4     | Eosin Y                                                                     | 10 mol %                 | 0         |
| 5     | $\text{Mes-Acr}^+\text{ClO}_4^-$                                            | 10 mol %                 | 0         |
| 6     | <b>4CzIPN</b>                                                               | <b>2 mol %</b>           | <b>36</b> |
| 7     | $\text{Ir}[(\text{dF}(\text{CF}_3)\text{ppy})_2(\text{dtbbpy})]\text{PF}_6$ | 2 mol %                  | 5         |

### 2.2 Solvent screening for the reaction

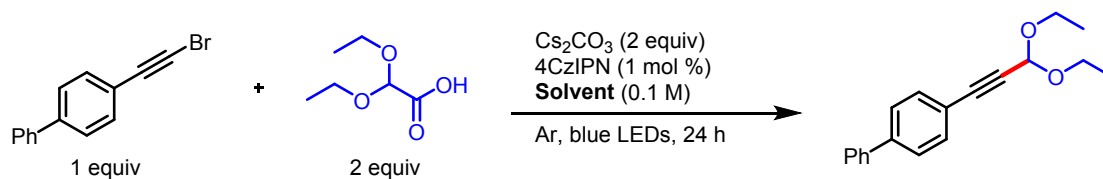

**Table S2. Solvent screening for the reaction**

| Entry     | Solvent               | Yield/%   |
|-----------|-----------------------|-----------|
| 1         | DCM                   | 0         |
| 2         | MeCN                  | 25        |
| 3         | Toluene               | 0         |
| 4         | PhCl                  | 0         |
| 5         | DMA                   | 36        |
| 6         | DMF                   | 43        |
| 7         | DMSO                  | 41        |
| 8         | 1,4 – dioxane         | 0         |
| 9         | CHCl <sub>3</sub>     | 0         |
| 10        | Acetone               | 12        |
| 11        | PhCF <sub>3</sub>     | 0         |
| <b>12</b> | <b>DMF/MeCN = 1/1</b> | <b>57</b> |

### 2.3 Base screening for the reaction

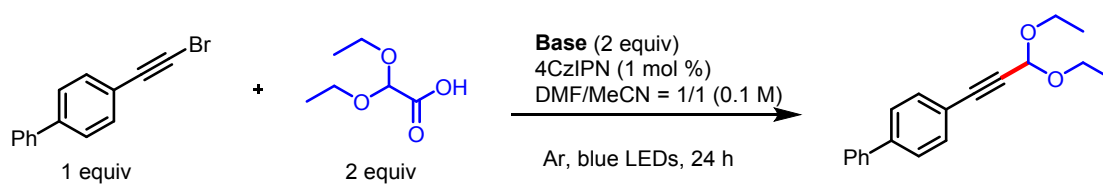

**Table S3. Base screening for the reaction**

| Entry     | Base                                | Yield     |
|-----------|-------------------------------------|-----------|
| 1         | K <sub>2</sub> HPO <sub>4</sub>     | 40        |
| 2         | CsF                                 | 0         |
| 3         | K <sub>2</sub> CO <sub>3</sub>      | 52        |
| 4         | Li <sub>2</sub> CO <sub>3</sub>     | 0         |
| 5         | Na <sub>2</sub> CO <sub>3</sub>     | 47        |
| 6         | KOH                                 | 0         |
| 7         | CsOH                                | 0         |
| 8         | KOAc                                | 40        |
| 9         | 2,4 – lutidine                      | 0         |
| <b>10</b> | <b>Cs<sub>2</sub>CO<sub>3</sub></b> | <b>57</b> |

#### 2.4 Leaving group screening for the reaction

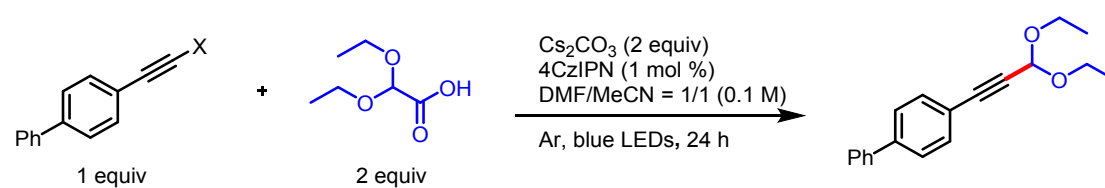

**Table S4. Leaving group screening for the reaction**

| Entry    | X         | Yield/%   |
|----------|-----------|-----------|
| 1        | Cl        | 37        |
| <b>2</b> | <b>Br</b> | <b>57</b> |
| 3        | I         | Trace     |

|   |      |   |
|---|------|---|
| 4 | H    | 0 |
| 5 | BI   | 0 |
| 6 | TMS  | 0 |
| 7 | Ts   | 0 |
| 8 | COOH | 0 |

### 2.5 Loading of 2 screening for the reaction

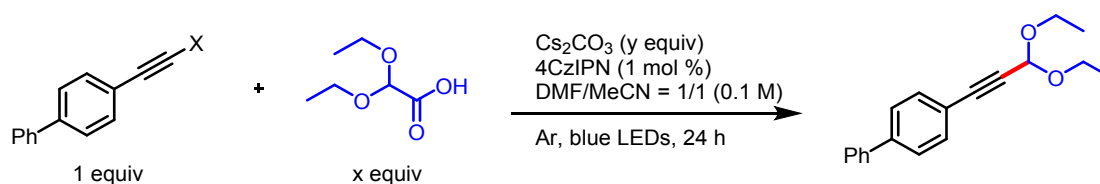

Table S5. Loading of 2 screening for the reaction

| Entry    | x        | y        | Yield/%   |
|----------|----------|----------|-----------|
| <b>1</b> | <b>2</b> | <b>2</b> | <b>57</b> |
| 2        | 5        | 5        | 30        |
| 3        | 5        | 10       | 49        |
| 4        | 10       | 10       | 44        |

### 3. General procedure of compounds 1

#### 3.1 General Procedure for the synthesis of 1.

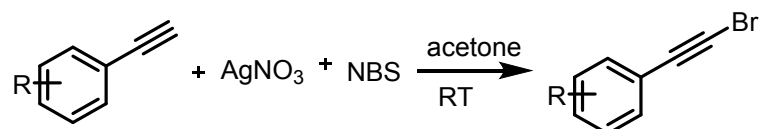

To the round bottom flask, terminal alkyne (1.0 equiv) and  $\text{AgNO}_3$  (0.1 equiv) were sequentially added, then acetone was added, and then NBS (1.2 equiv) was added in portions under stirring, and the mixture was stirred at room temperature until the

reaction was completely monitored by TLC. After the reaction was completed, the solvent was removed under vacuum. The desired products were obtained in the corresponding yields after purification by flash chromatography on silica gel eluting with PE and ethyl acetate.

### 1-(bromoethynyl)-2-chlorobenzene

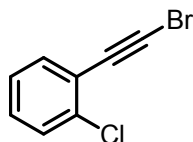

$^1\text{H NMR}$  (400 MHz,  $\text{CDCl}_3$ )  $\delta$  7.48 (d,  $J = 7.6$  Hz, 1H), 7.39 (d,  $J = 8.0$  Hz, 1H), 7.27 (t,  $J = 6.8$  Hz, 1H), 7.21 (t,  $J = 7.6$  Hz, 1H).  $^{13}\text{C NMR}$  (100 MHz,  $\text{CDCl}_3$ )  $\delta$  136.5, 134.0, 129.8, 129.4, 126.6, 122.8, 100.1, 55.4.

### *N*-(3-(bromoethynyl) phenyl) benzamide

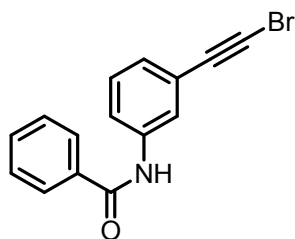

$^1\text{H NMR}$  (400 MHz,  $\text{CDCl}_3$ )  $\delta$  7.89 (d,  $J = 7.2$  Hz, 2H), 7.79 (s, 1H), 7.77 (s, 1H), 7.69 (d,  $J = 8.0$  Hz, 1H), 7.60 (t,  $J = 7.2$  Hz, 1H), 7.53 (t,  $J = 7.6$  Hz, 2H), 7.35 (t,  $J = 8.0$  Hz, 1H), 7.26 (d,  $J = 7.6$  Hz, 1H).  $^{13}\text{C NMR}$  (100 MHz,  $\text{CDCl}_3$ )  $\delta$  165.8, 138.1, 134.8, 132.2, 129.3, 129.0, 128.2, 127.2, 123.7, 123.6, 120.7, 79.7, 50.6.

### 6-(bromoethynyl)-2,3-dihydrobenzo[*b*] [1,4] dioxine

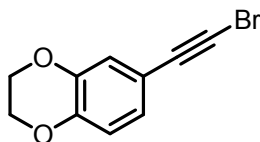

$^1\text{H NMR}$  (400 MHz,  $\text{CDCl}_3$ )  $\delta$  6.89 – 6.81 (m, 2H), 6.68 (d,  $J = 8.4$  Hz, 1H), 4.13 (d,  $J = 2.4$  Hz, 4H).  $^{13}\text{C NMR}$  (100 MHz,  $\text{CDCl}_3$ )  $\delta$  144.5, 143.2, 125.6, 120.9, 117.4, 115.4, 79.8, 64.5, 64.2, 48.0.

### 1-((allyloxy)methyl)-2-(bromoethynyl) benzene

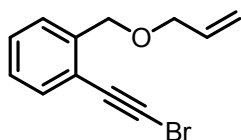

$^1\text{H NMR}$  (400 MHz,  $\text{CDCl}_3$ )  $\delta$  7.37 (dd,  $J = 14.8, 7.6$  Hz, 2H), 7.26 (t,  $J = 7.6$  Hz, 1H), 7.14 (t,  $J = 7.6$  Hz, 1H), 5.90 (ddd,  $J = 22.4, 10.8, 5.6$  Hz, 1H), 5.26 (d,  $J = 17.2$  Hz, 1H), 5.14 (d,  $J = 10.4$  Hz, 1H), 4.58 (s, 2H), 4.00 (d,  $J = 5.2$  Hz, 2H).  $^{13}\text{C NMR}$  (100 MHz,  $\text{CDCl}_3$ )  $\delta$  141.0, 134.74, 132.7, 129.0, 127.7, 127.4, 121.3, 117.3, 78.0, 71.7, 70.1, 53.9.

**(8*R*,9*S*,13*S*,14*S*)-3-(bromoethynyl)-13-methyl-6,7,8,9,11,12,13,14,15,16-decahydro-17*H*-cyclopenta[*a*]phenanthren-17-one**

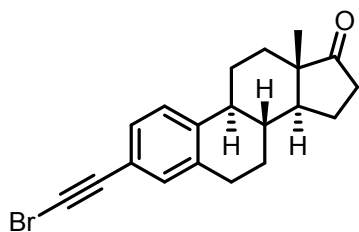

$^1\text{H NMR}$  (400 MHz,  $\text{CDCl}_3$ )  $\delta$  7.23 (t,  $J = 12.8$  Hz, 3H), 2.88 (s, 1H), 2.66 – 1.08 (m, 14H), 0.91 (s, 3H).  $^{13}\text{C NMR}$  (100 MHz,  $\text{CDCl}_3$ )  $\delta$  220.8, 140.9, 136.8, 132.6, 129.4, 125.5, 120.2, 80.2, 50.6, 48.9, 48.1, 44.6, 38.1, 36.0, 31.7, 29.2, 26.4, 25.7, 21.7, 14.0.

**3-(bromoethynyl)phenyl palmitate**

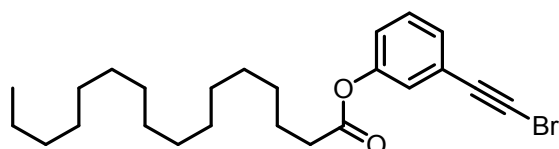

$^1\text{H NMR}$  (400 MHz,  $\text{CDCl}_3$ )  $\delta$  7.30 (s, 2H), 7.17 (s, 1H), 7.07 (s, 1H), 2.54 (t,  $J = 7.2$  Hz, 2H), 1.78 – 1.69 (m, 2H), 1.26 (s, 24H), 0.88 (t,  $J = 6.4$  Hz, 3H).  $^{13}\text{C NMR}$  (100 MHz,  $\text{CDCl}_3$ )  $\delta$  172.2, 150.6, 129.5, 129.5, 125.3, 124.1, 122.5, 79.2, 51.0, 34.5, 32.1, 29.8, 29.8, 29.7, 29.6, 29.5, 29.4, 29.2, 25.0, 22.9, 14.3.

**3.2 Procedure for the synthesis of 3-(bromoethynyl) thiophene**

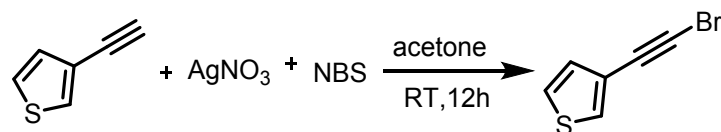

To the round bottom flask, 3-thienyl acetylene (500 mg, 4.62 mmol, 1.0 equiv) and  $\text{AgNO}_3$  (78.1 mg, 0.46 mmol, 0.1 equiv) were sequentially added, then acetone (20 mL) was added, and then NBS (987.3 mg, 5.55 mmol, 1.2 equiv) was added in portions under stirring, and the mixture was stirred at room temperature for 12 hours. After the reaction was completed, the solvent was removed under vacuum. The desired products were obtained in the corresponding yields after purification by flash chromatography on silica gel eluting with PE. (brown oil, 52%).

### 3-(bromoethynyl)thiophene

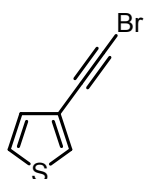

$^1\text{H NMR}$  (400 MHz,  $\text{CDCl}_3$ )  $\delta$  7.48 (dd,  $J = 3.2, 1.2$  Hz, 1H), 7.26 – 7.23 (m, 1H), 7.11 (dd,  $J = 5.2, 1.2$  Hz, 1H).  $^{13}\text{C NMR}$  (100 MHz,  $\text{CDCl}_3$ )  $\delta$  129.8, 129.8, 125.4, 121.7, 75.4, 49.5.

### 3.3 Procedure for the synthesis of 3-(bromoethynyl) pyridine

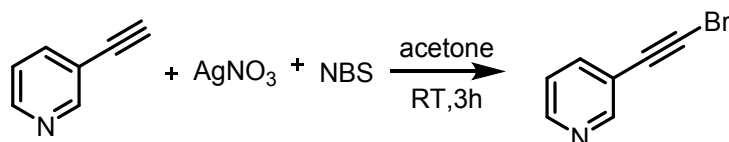

To the round bottom flask, 3-Ethynylpyridine (250 mg, 2.42 mmol, 1.0 equiv) and  $\text{AgNO}_3$  (40.8 mg, 0.24 mmol, 0.1 equiv) were sequentially added, then acetone (10 mL) was added, and then NBS (517.8 mg, 2.91 mmol, 1.2 equiv) was added in portions under stirring, and the mixture heated to reflux for three hours. After completion of the reaction, the solvent was removed under vacuum. The desired products were obtained in the corresponding yields after purification by flash chromatography on silica gel eluting with PE/ethyl acetate = 5/1. (white solid, 68%).

### 4. General procedure of compounds 2

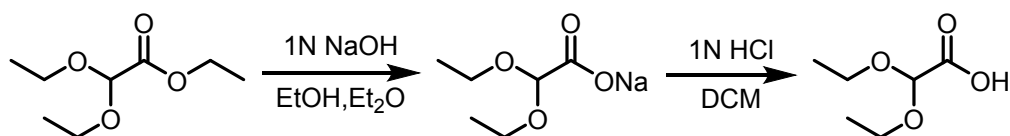



Add 1N NaOH (26 mL, 1.2 equiv) aqueous solution to 2,2-diethoxyacetate (3,86 mL, 21.6 mmol, 1.0 equiv), stir at room temperature for 3 h, then the solution was removed under vacuum, extract the aqueous phase with diethyl ether (20 mL  $\times$  3) to wash off unreacted 2,2-diethoxyacetate. Then add 1N HCl under stirring at -10 °C until the reaction solution is acidic. The reaction solution is slowly warmed to room temperature and stirred for another 2 h. Finally, it is extracted with DCM (20 mL  $\times$  3) washed with saturated brine, dried over anhydrous Na<sub>2</sub>SO<sub>4</sub>. The solvent was removed under vacuum to give the product (light yellow oil, 82%).

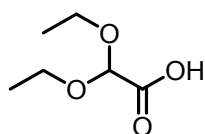

<sup>1</sup>H NMR (400 MHz, CDCl<sub>3</sub>)  $\delta$  10.21 (s, 1H), 4.95 (s, 1H), 3.75 – 3.61 (m, 4H), 1.24 (t,  $J$  = 7.2 Hz, 6H).

## 5. General procedure of photocatalyst 4CzIPN

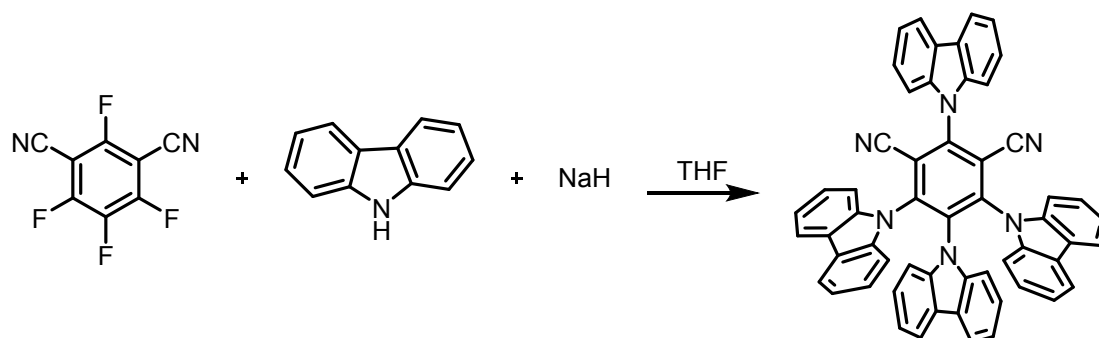

Add 9H – carbazole (1.67 g, 10 mmol, 5 equiv) and a magneton to a 100 mL four-necked flask, then replace the gas three times under argon, add THF (20 mL) to the system through a syringe, place the device in an ice bath at 0 °C, then add NaH (0.6 g, 15 mmol, 7.5 equiv) under stirring slowly, continue to stir for another 0.5 h, after then add 2,4,5,6 – tetrafluoroisophthalonitrile (0.4 g, 2.0 mmol, 1.0 equiv) The four-necked flask was slowly warmed to room temperature and stirred for 12 h. After completion of the reaction, the reaction was quenched by the addition of 2 mL H<sub>2</sub>O. The solvent was removed under vacuum, the crude product was washed with water and ethanol, and then recrystallized from dichloromethane and n-hexane. The desired products were obtained in the corresponding yields after purification by flash chromatography on silica gel eluting with DCM/n-hexane = 4/1. (1.4 g, bright yellow crystalline solid, 87%).

## 1,2,3,5-tetrakis(carbazol-9-yl)-4,6-dicyanobenzene

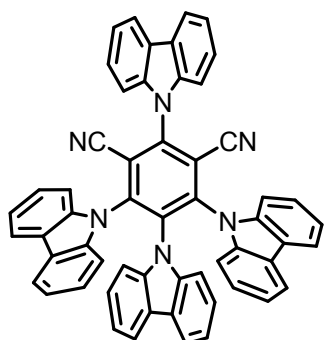

$^1\text{H NMR}$  (400 MHz,  $\text{CDCl}_3$ )  $\delta$  8.22 (d,  $J = 7.6$  Hz, 2H), 7.74 – 7.67 (m, 8H), 7.52 – 7.47 (m, 2H), 7.33 (d,  $J = 7.6$  Hz, 2H), 7.22 (dd,  $J = 6.8, 2.0$  Hz, 4H), 7.08 (m, 8H), 6.82 (t,  $J = 8.4$  Hz, 4H), 6.63 (t,  $J = 7.6$  Hz, 2H).

### 6. General procedure of compounds 3 and removal of the acetal group

#### General procedure of compounds 3

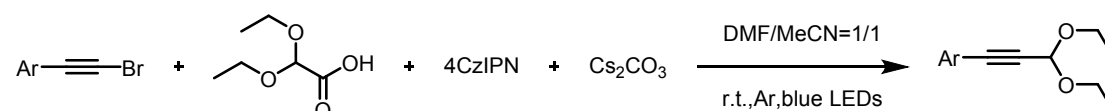

To an oven-dried 8 mL reaction flask equipped with a stir bar, was added arylethynyl bromide (0.3 mmol, 1.0 equiv), 2,2-diethoxyacetic acid (88.8 mg, 0.6 mmol, 2.0 equiv), 4CzIPN (2.3 mg, 0.003 mmol, 0.01 equiv),  $\text{Cs}_2\text{CO}_3$  (195.5 mg, 0.6 mmol, 2.0 equiv). Then replace the gas three times under argon. After then, DMF (1.5 mL) and MeCN (1.5 mL) were injected into the tube by syringe. The solution was then stirred at room temperature under the irradiation of 5 W blue LED for 24 h. After completion of the reaction, Then the solution was extracted with DCM (10 mL  $\times$  3). The combined organic layer was washed with water (30 mL  $\times$  3), and then was washed with brine and dried over anhydrous  $\text{Na}_2\text{SO}_4$  and evaporated in vacuum. The desired products were obtained in the corresponding yields after purification by flash chromatography on silica gel eluting with PE and ethyl acetate.

#### Removal of the acetal group

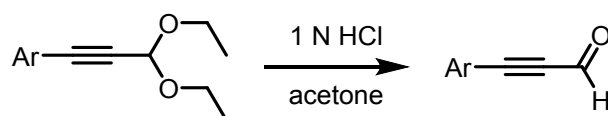

Adding 0.5 mL 1 N HCl to the above product, stirred for 2 h and extracted with DCM (10 mL  $\times$  3). The combined organic layer was washed with brine and then dried over anhydrous Na<sub>2</sub>SO<sub>4</sub> and evaporated in vacuum. The desired products were obtained in the corresponding yields after purification by flash chromatography on silica gel eluting with hexanes and ethyl acetate.

## 7. Characterization of products

### (3, 3-diethoxyprop-1-yn-1-yl) benzene (3a)

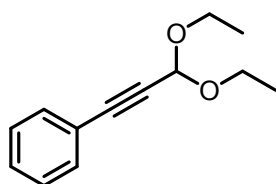

Colourless oil, yield 57%, <sup>1</sup>H NMR (400 MHz, CDCl<sub>3</sub>)  $\delta$  7.48 (d,  $J$  = 7.6 Hz, 2H), 7.32 (t,  $J$  = 6.4 Hz, 3H), 5.50 (s, 1H), 3.87 – 3.79 (m, 2H), 3.71 – 3.63 (m, 2H), 1.28 (t,  $J$  = 7.2 Hz, 6H). <sup>13</sup>C NMR (100 MHz, CDCl<sub>3</sub>)  $\delta$  132.1, 128.9, 128.4, 122.1, 92.0, 85.4, 84.6, 61.1, 15.3. NMR data were in close agreement with the literature<sup>1</sup>.

### 1-(3, 3-diethoxyprop-1-yn-1-yl)-4-methylbenzene (3b)

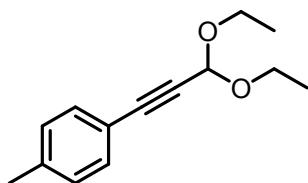

Colourless oil, yield 51%, <sup>1</sup>H NMR (400 MHz, CDCl<sub>3</sub>)  $\delta$  7.37 (d,  $J$  = 8.0 Hz, 2H), 7.12 (d,  $J$  = 8.0 Hz, 2H), 5.49 (s, 1H), 3.82 (m, 2H), 3.66 (m, 2H), 2.35 (s, 3H), 1.28 (t,  $J$  = 7.1 Hz, 6H). <sup>13</sup>C NMR (100 MHz, CDCl<sub>3</sub>)  $\delta$  139.1, 132.0, 129.2, 119.0, 92.0, 85.6, 83.9, 61.1, 21.7, 15.3. NMR data were in close agreement with the literature<sup>2</sup>.

### 1-(3,3-diethoxyprop-1-yn-1-yl)-4-ethylbenzene(3c)

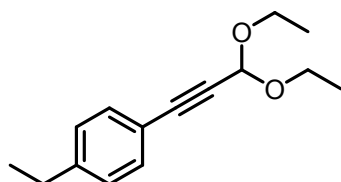

Colourless oil, yield 48%, <sup>1</sup>H NMR (400 MHz, CDCl<sub>3</sub>)  $\delta$  7.39 (d,  $J$  = 8.0 Hz, 2H), 7.14 (d,  $J$  = 8.0 Hz, 2H), 5.49 (s, 1H), 3.87 – 3.78 (m, 2H), 3.71 – 3.61 (m, 2H), 2.63 (q,  $J$  =

7.6 Hz, 2H), 1.27 (t,  $J = 7.2$  Hz, 6H), 1.22 (t,  $J = 7.6$  Hz, 3H).  $^{13}\text{C}$  NMR (100 MHz,  $\text{CDCl}_3$ )  $\delta$  145.3, 132.0, 127.9, 119.1, 92.0, 85.5, 83.8, 61.0, 28.9, 15.4, 15.2. The compound is new compound.

### 1-(3, 3-diethoxyprop-1-yn-1-yl)-4-propylbenzene(3d)

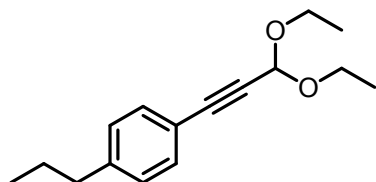

Colourless oil, yield 64%,  $^1\text{H}$  NMR (400 MHz,  $\text{CDCl}_3$ )  $\delta$  7.39 (d,  $J = 6.8$  Hz, 2H), 7.12 (d,  $J = 6.8$  Hz, 2H), 5.49 (s, 1H), 3.88 – 3.76 (m, 2H), 3.73 – 3.61 (m, 2H), 2.57 (t,  $J = 6.8$  Hz, 2H), 1.62 (dd,  $J = 14.0, 6.8$  Hz, 2H), 1.27 (t,  $J = 6.0$  Hz, 6H), 0.92 (t,  $J = 6.4$  Hz, 3H).  $^{13}\text{C}$  NMR (100 MHz,  $\text{CDCl}_3$ )  $\delta$  143.8, 132.0, 128.5, 119.1, 92.0, 85.6, 83.8, 61.0, 38.1, 24.4, 15.3, 13.9. The compound is new compound.

### 1-butyl-4-(3,3-diethoxyprop-1-yn-1-yl) benzene(3e)

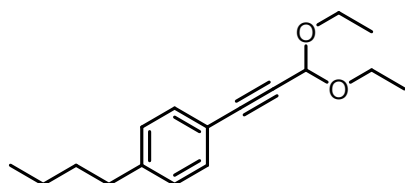

Yellow oil, yield 49%,  $^1\text{H}$  NMR (400 MHz,  $\text{CDCl}_3$ )  $\delta$  7.38 (d,  $J = 8.0$  Hz, 2H), 7.12 (d,  $J = 8.0$  Hz, 2H), 5.49 (s, 1H), 3.87 – 3.76 (m, 2H), 3.71 – 3.61 (m, 2H), 2.62 – 2.56 (m, 2H), 1.62 – 1.53 (m, 2H), 1.35 (dd,  $J = 14.0, 6.8$  Hz, 2H), 1.27 (t,  $J = 7.2$  Hz, 6H), 0.91 (t,  $J = 7.2$  Hz, 3H).  $^{13}\text{C}$  NMR (100 MHz,  $\text{CDCl}_3$ )  $\delta$  144.1, 132.0, 128.5, 119.1, 92.0, 85.6, 83.8, 61.0, 35.7, 33.5, 22.4, 15.3, 14.0. The compound is new compound.

### 1-(tert-butyl)-4-(3,3-diethoxyprop-1-yn-1-yl) benzene (3f)

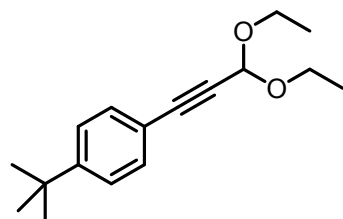

Yellow oil, yield 47%,  $^1\text{H}$  NMR (400 MHz,  $\text{CDCl}_3$ )  $\delta$  7.41 (d,  $J = 8.4$  Hz, 2H), 7.33 (d,  $J = 8.4$  Hz, 2H), 5.49 (s, 1H), 3.86 – 3.79 (m, 2H), 3.70 – 3.62 (m, 2H), 1.30 (s, 9H), 1.27 (t,  $J = 7.2$  Hz, 6H).  $^{13}\text{C}$  NMR (100 MHz,  $\text{CDCl}_3$ )  $\delta$  152.2, 131.8, 125.4, 118.9,

92.0, 85.5, 83.8, 61.0, 34.9, 31.3, 15.3. NMR data were in close agreement with the literature<sup>2</sup>.

#### 4-(3,3-diethoxyprop-1-yn-1-yl)-1,1'-biphenyl (3g)

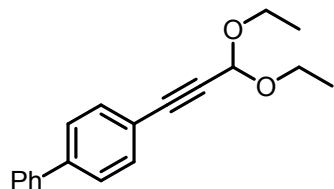

Colourless oil, yield 57%, <sup>1</sup>H NMR (400 MHz, CDCl<sub>3</sub>) δ 7.66 – 7.56 (m, 6H), 7.48 (t, *J* = 7.6 Hz, 2H), 7.40 (t, *J* = 7.2 Hz, 1H), 5.57 (s, 1H), 3.99 – 3.82 (m, 2H), 3.82 – 3.65 (m, 2H), 1.34 (t, *J* = 7.1 Hz, 6H). <sup>13</sup>C NMR (100 MHz, CDCl<sub>3</sub>) δ 140.7, 139.3, 131.5, 128.0, 126.9, 126.2, 126.1, 119.9, 91.0, 84.2, 84.1, 60.1, 14.3. The compound is new compound.

#### 1-(3,3-diethoxyprop-1-yn-1-yl)-4-methoxybenzene(3h)

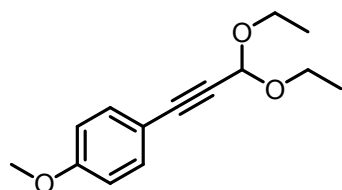

Colourless oil, yield 34%, <sup>1</sup>H NMR (400 MHz, CDCl<sub>3</sub>) δ 7.41 (d, *J* = 8.4 Hz, 2H), 6.83 (d, *J* = 8.5 Hz, 2H), 5.48 (s, 1H), 3.87 – 3.76 (m, 5H), 3.70 – 3.61 (m, 2H), 1.27 (t, *J* = 7.2 Hz, 6H). <sup>13</sup>C NMR (100 MHz, CDCl<sub>3</sub>) δ 160.1, 133.5, 114.0, 114.0, 92.0, 85.4, 83.2, 61.0, 55.4, 15.3. NMR data were in close agreement with the literature<sup>2</sup>.

#### 5-(3,3-diethoxyprop-1-yn-1-yl) benzo[*d*] [1,3] dioxole (3i)

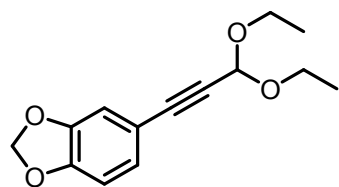

Yellow oil, yield 43%, <sup>1</sup>H NMR (400 MHz, CDCl<sub>3</sub>) δ 7.00 (d, *J* = 9.6 Hz, 1H), 6.91 (s, 1H), 6.74 (d, *J* = 8.0 Hz, 1H), 5.97 (s, 2H), 5.46 (s, 1H), 3.85 – 3.76 (m, 2H), 3.64 (m, 2H), 1.27 (t, *J* = 7.2 Hz, 6H). <sup>13</sup>C NMR (100 MHz, CDCl<sub>3</sub>) δ 148.4, 147.5, 126.9, 115.2, 112.0, 108.5, 101.5, 91.9, 85.3, 82.9, 61.0, 15.3. The compound is new compound.

#### 6-(3,3-diethoxyprop-1-yn-1-yl)-2,3-dihydrobenzo[*b*] [1,4] dioxine (3j)

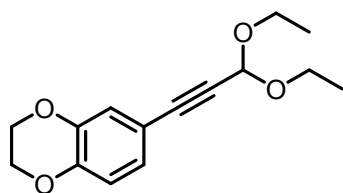

Colourless oil, yield 43%,  $^1\text{H NMR}$  (400 MHz,  $\text{CDCl}_3$ )  $\delta$  6.98 (d,  $J = 1.6$  Hz, 1H), 6.96 (d,  $J = 8.4$  Hz, 1H), 6.77 (d,  $J = 8.4$  Hz, 1H), 5.46 (s, 1H), 4.23 (q,  $J = 4.8$  Hz, 4H), 3.85 – 3.75 (m, 2H), 3.68 – 3.59 (m, 2H), 1.26 (t,  $J = 7.2$  Hz, 6H).  $^{13}\text{C NMR}$  (100 MHz,  $\text{CDCl}_3$ )  $\delta$  144.6, 143.3, 125.7, 120.9, 117.4, 114.7, 91.9, 85.1, 82.9, 64.5, 64.3, 61.0, 15.2. The compound is new compound.

### N-(3-(3,3-diethoxyprop-1-yn-1-yl)phenyl) benzamide (3k)

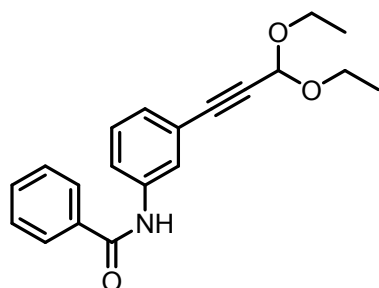

Colourless solid, yield 49%, M.p 125°C,  $^1\text{H NMR}$  (400 MHz,  $\text{CDCl}_3$ )  $\delta$  8.01 (s, 1H), 7.83 (d,  $J = 7.2$  Hz, 2H), 7.74 (s, 1H), 7.66 (d,  $J = 8.0$  Hz, 1H), 7.53 (t,  $J = 7.2$  Hz, 1H), 7.45 (t,  $J = 7.6$  Hz, 2H), 7.28 (t,  $J = 8.0$  Hz, 1H), 7.24 (d,  $J = 7.6$  Hz, 1H), 5.48 (s, 1H), 3.81 (m, 2H), 3.65 (m, 2H), 1.27 (t,  $J = 7.2$  Hz, 6H).  $^{13}\text{C NMR}$  (100 MHz,  $\text{CDCl}_3$ )  $\delta$  166.0, 138.1, 134.8, 132.1, 129.2, 128.9, 128.2, 127.2, 123.5, 122.8, 120.9, 91.9, 84.8, 84.8, 61.1, 15.2. The compound is new compound.

### 1-(3-(3,3-diethoxyprop-1-yn-1-yl)-2-fluorobenzene(3l)

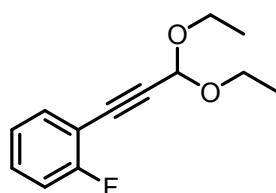

yellowish oil, yield 52%,  $^1\text{H NMR}$  (400 MHz,  $\text{CDCl}_3$ )  $\delta$  7.49 – 7.43 (m, 1H), 7.31 (tdd,  $J = 7.6, 5.4, 1.6$  Hz, 1H), 7.07 (dd,  $J = 16.8, 8.8$  Hz, 2H), 5.51 (s, 1H), 3.83 (m, 2H), 3.67 (m, 2H), 1.27 (t,  $J = 7.2$  Hz, 6H).  $^{13}\text{C NMR}$  (100 MHz,  $\text{CDCl}_3$ )  $\delta$  163.1(d,  $J = 251.0$  Hz), 133.8, 130.71 (d,  $J = 7.9$  Hz), 124.00 (d,  $J = 3.9$  Hz), 115.6 (d,  $J = 21.0$  Hz), 110.7 (d,  $J = 15.8$  Hz), 91.8, 89.7, 78.8, 61.2, 15.2.  $^{19}\text{F NMR}$  (376 MHz,  $\text{CDCl}_3$ )  $\delta$  -

113.95 (dd,  $J = 14.7, 6.5$  Hz, 1F). NMR data were in close agreement with the literature<sup>2</sup>.

### 1-(3,3-diethoxyprop-1-yn-1-yl)-4-fluorobenzene (3m)

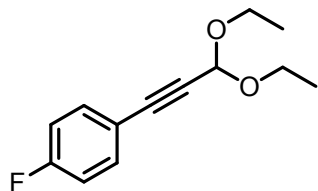

Colourless oil, yield 44%, <sup>1</sup>H NMR (400 MHz, CDCl<sub>3</sub>)  $\delta$  7.48 – 7.41 (m, 2H), 7.00 (t,  $J = 8.8$  Hz, 2H), 5.47 (s, 1H), 3.87 – 3.76 (m, 2H), 3.70 – 3.60 (m, 2H), 1.27 (t,  $J = 7.2$  Hz, 6H). <sup>13</sup>C NMR (100 MHz, CDCl<sub>3</sub>)  $\delta$  164.2 (d,  $J = 252.5$  Hz), 134.0 (d,  $J = 8.5$  Hz), 118.1, 115.7 (d,  $J = 22$  Hz), 91.9, 84.3, 77.5, 61.1, 15.2. <sup>19</sup>F NMR (376 MHz, CDCl<sub>3</sub>)  $\delta$  -114.48 – -114.76 (m). 1F NMR data were in close agreement with the literature<sup>2</sup>.

### 1-chloro-2-(3,3-diethoxyprop-1-yn-1-yl) benzene(3n)

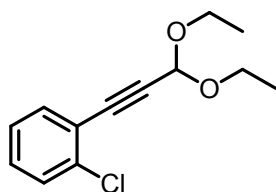

Colourless oil, yield 48%, <sup>1</sup>H NMR (400 MHz, CDCl<sub>3</sub>)  $\delta$  7.51 (d,  $J = 7.6$  Hz, 1H), 7.39 (d,  $J = 8.0$  Hz, 1H), 7.27 (t,  $J = 7.2$  Hz, 1H), 7.20 (t,  $J = 7.6$  Hz, 1H), 5.54 (s, 1H), 3.87 (m, 2H), 3.69 (m, 2H), 1.28 (t,  $J = 7.2$  Hz, 6H). <sup>13</sup>C NMR (100 MHz, CDCl<sub>3</sub>)  $\delta$  136.3, 133.8, 130.0, 129.4, 126.5, 122.1, 91.9, 89.7, 82.0, 61.2, 15.3. The compound is new compound.

### 1-chloro-3-(3,3-diethoxyprop-1-yn-1-yl) benzene (3o)

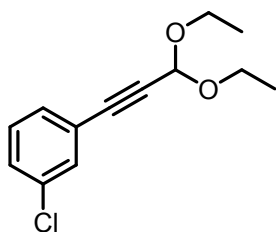

yellowish oil, yield 54%, <sup>1</sup>H NMR (400 MHz, CDCl<sub>3</sub>)  $\delta$  7.39 (s, 1H), 7.26 (dd,  $J = 16.0, 7.6$  Hz, 2H), 7.17 (dd,  $J = 8.8, 6.8$  Hz, 1H), 5.41 (s, 1H), 3.80 – 3.69 (m, 2H), 3.64 – 3.54 (m, 2H), 1.20 (t,  $J = 6.0$  Hz, 6H). <sup>13</sup>C NMR (100 MHz, CDCl<sub>3</sub>)  $\delta$  134.2, 131.9,

130.2, 129.6, 129.2, 123.7, 91.8, 85.7, 83.8, 61.2, 15.2. The compound is new compound.

**1-chloro-4-(3, 3-diethoxyprop-1-yn-1-yl) benzene (3p)**

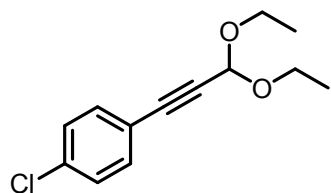

Colourless oil, yield 55%,  $^1\text{H NMR}$  (400 MHz,  $\text{CDCl}_3$ )  $\delta$  7.40 (d,  $J = 8.4$  Hz, 2H), 7.28 (d,  $J = 8.4$  Hz, 2H), 5.47 (s, 1H), 3.81 (m, 2H), 3.65 (m, 2H), 1.27 (t,  $J = 7.2$  Hz, 6H).  $^{13}\text{C NMR}$  (100 MHz,  $\text{CDCl}_3$ )  $\delta$  135.1, 133.3, 128.8, 120.5, 91.8, 85.5, 84.2, 61.1, 15.2. The compound is new compound.

**1-bromo-4-(3, 3-diethoxyprop-1-yn-1-yl) benzene (3q)**

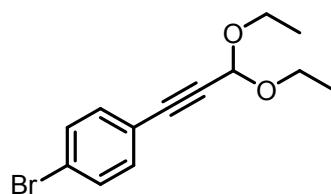

Colourless oil, yield 49%,  $^1\text{H NMR}$  (400 MHz,  $\text{CDCl}_3$ )  $\delta$  7.45 (d,  $J = 7.2$  Hz, 2H), 7.33 (d,  $J = 7.2$  Hz, 2H), 5.47 (s, 1H), 3.86 – 3.76 (m, 2H), 3.70 – 3.61 (m, 2H), 1.27 (t,  $J = 7.2$  Hz, 6H).  $^{13}\text{C NMR}$  (100 MHz,  $\text{CDCl}_3$ )  $\delta$  133.4, 131.6, 123.2, 120.8, 91.7, 85.6, 84.1, 61.0, 15.2. The compound is new compound.

**1-(3, 3-diethoxyprop-1-yn-1-yl)-4-(trifluoromethyl) benzene (3r)**

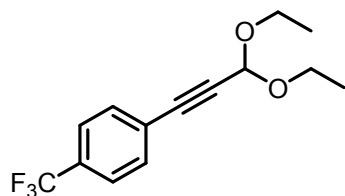

Colourless oil, yield 42%,  $^1\text{H NMR}$  (400 MHz,  $\text{CDCl}_3$ )  $\delta$  7.57 (s, 4H), 5.50 (s, 1H), 3.86 – 3.78 (m, 2H), 3.70 – 3.63 (m, 2H), 1.28 (t,  $J = 7.2$  Hz, 6H).  $^{13}\text{C NMR}$  (100 MHz,  $\text{CDCl}_3$ )  $\delta$  131.3 (q,  $J = 33$  Hz), 125.8, 125.4 (q,  $J = 3.7$  Hz), 122.6, 91.8, 87.0, 83.8, 61.3, 15.3.  $^{19}\text{F NMR}$  (376 MHz,  $\text{CDCl}_3$ )  $\delta$  -67.46 (s).  $^3\text{F NMR}$  data were in close agreement with the literature<sup>2</sup>.

**4-(3, 3-diethoxyprop-1-yn-1-yl) benzonitrile (3s)**



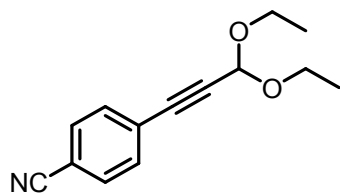

Colourless oil, yield 43%,  $^1\text{H NMR}$  (400 MHz,  $\text{CDCl}_3$ )  $\delta$  7.59 (dd,  $J = 22.4, 8.4$  Hz, 4H), 5.50 (s, 1H), 3.81 (m, 2H), 3.67 (m, 2H), 1.28 (t,  $J = 7.2$  Hz, 6H).  $^{13}\text{C NMR}$  (100 MHz,  $\text{CDCl}_3$ )  $\delta$  132.5, 132.0, 126.8, 118.3, 112.3, 91.6, 88.7, 83.3, 61.2, 15.1. NMR data were in close agreement with the literature<sup>2</sup>.

### 2-(3, 3-diethoxyprop-1-yn-1-yl) benzonitrile (3t)

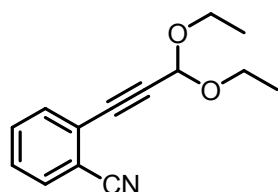

Colourless oil, yield 55%,  $^1\text{H NMR}$  (400 MHz,  $\text{CDCl}_3$ )  $\delta$  7.64 (d,  $J = 7.6$  Hz, 1H), 7.57 (t,  $J = 6.0$  Hz, 1H), 7.53 (d,  $J = 7.6$  Hz, 1H), 7.43 (t,  $J = 7.6$  Hz, 1H), 5.53 (s, 1H), 3.88 – 3.82 (m, 2H), 3.73 – 3.64 (m, 2H), 1.27 (t,  $J = 7.2$  Hz, 6H).  $^{13}\text{C NMR}$  (100 MHz,  $\text{CDCl}_3$ )  $\delta$  132.9, 132.8, 132.5, 129.1, 125.9, 117.3, 115.7, 91.7, 90.9, 81.1, 61.4, 15.2. NMR data were in close agreement with the literature<sup>2</sup>.

### 1-(4-(3, 3-diethoxyprop-1-yn-1-yl) phenyl) ethenone (3u)

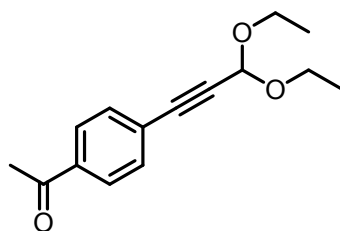

Colourless oil, yield 30%,  $^1\text{H NMR}$  (400 MHz,  $\text{CDCl}_3$ )  $\delta$  7.91 (d,  $J = 8.4$  Hz, 2H), 7.56 (d,  $J = 8.4$  Hz, 2H), 5.51 (s, 1H), 3.83 (m, 2H), 3.68 (m, 2H), 2.60 (s, 3H), 1.29 (t,  $J = 7.2$  Hz, 6H).  $^{13}\text{C NMR}$  (100 MHz,  $\text{CDCl}_3$ )  $\delta$  197.4, 136.8, 132.2, 128.3, 126.8, 91.8, 87.6, 84.3, 61.2, 26.8, 15.2. NMR data were in close agreement with the literature<sup>2</sup>.

### methyl 4-(3, 3-diethoxyprop-1-yn-1-yl) benzoate (3v)

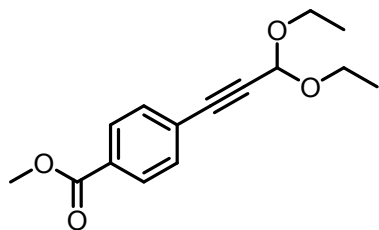

Colourless oil, yield 45%,  $^1\text{H NMR}$  (400 MHz,  $\text{CDCl}_3$ )  $\delta$  7.97 (d,  $J = 8.4$  Hz, 2H), 7.52 (d,  $J = 8.4$  Hz, 2H), 5.49 (s, 1H), 3.90 (s, 3H), 3.84 – 3.78 (m, 2H), 3.70 – 3.61 (m, 2H), 1.26 (t,  $J = 7.2$  Hz, 6H)  $^{13}\text{C NMR}$  (100 MHz,  $\text{CDCl}_3$ )  $\delta$  166.5, 132.0, 130.2, 129.5, 126.6, 91.8, 87.3, 84.4, 61.2, 52.4, 15.2. NMR data were in close agreement with the literature<sup>2</sup>.

### 1, 3-dichloro-5-(3, 3-diethoxyprop-1-yn-1-yl) benzene (3w)

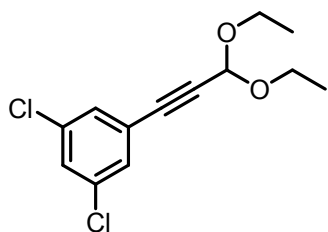

Colourless oil, yield 40%,  $^1\text{H NMR}$  (400 MHz,  $\text{CDCl}_3$ )  $\delta$  7.34 (d,  $J = 1.6$  Hz, 2H), 7.33 – 7.32 (m, 1H), 5.46 (s, 1H), 3.84 – 3.75 (m, 2H), 3.65 (m, 2H), 1.27 (t,  $J = 7.2$  Hz, 6H).  $^{13}\text{C NMR}$  (100 MHz,  $\text{CDCl}_3$ )  $\delta$  135.0, 130.2, 129.3, 124.8, 91.6, 86.9, 82.5, 61.2, 15.2. The compound is new compound.

### 3-(3, 3-diethoxyprop-1-yn-1-yl) thiophene (3x)

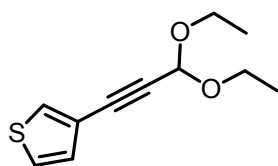

Yellowish oil, yield 34%,  $^1\text{H NMR}$  (400 MHz,  $\text{CDCl}_3$ )  $\delta$  7.52 (dd,  $J = 3.2, 1.6$  Hz, 1H), 7.27 (dd,  $J = 3.2, 1.6$  Hz, 1H), 7.15 (dd,  $J = 5.2, 1.2$  Hz, 1H), 5.50 (d,  $J = 8.8$  Hz, 1H), 3.83 (m, 2H), 3.67 (m, 2H), 1.29 (t,  $J = 7.2$  Hz, 6H).  $^{13}\text{C NMR}$  (100 MHz,  $\text{CDCl}_3$ )  $\delta$  130.0, 130.0, 125.5, 121.0, 91.9, 84.1, 80.6, 61.1, 15.3. NMR data were in close agreement with the literature<sup>2</sup>.

### 3-(3, 3-diethoxyprop-1-yn-1-yl) pyridine (3y)

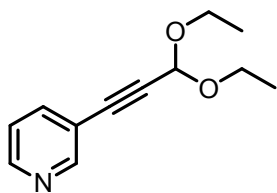

Yellow oil, yield 56%,  $^1\text{H NMR}$  (400 MHz,  $\text{CDCl}_3$ )  $\delta$  8.69 (s, 1H), 8.53 (s, 1H), 7.73 (d,  $J = 8.0$  Hz, 1H), 7.23 (dd,  $J = 7.6, 4.8$  Hz, 1H), 5.47 (s, 1H), 3.83 – 3.75 (m, 2H), 3.68 – 3.63 (m, 2H), 1.25 (t,  $J = 7.2$  Hz, 6H).  $^{13}\text{C NMR}$  (100 MHz,  $\text{CDCl}_3$ )  $\delta$  152.6, 149.2, 138.9, 123.1, 119.2, 91.7, 87.9, 81.9, 61.2, 15.2. NMR data were in close agreement with the literature<sup>2</sup>.

### 2-bromo-5-(3,3-diethoxyprop-1-yn-1-yl)-1-methyl-1H-indole (3z)

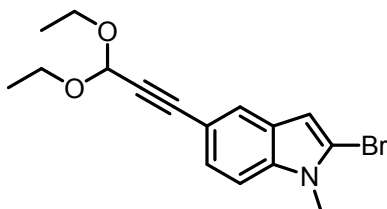

Colourless oil, yield 55%,  $^1\text{H NMR}$  (400 MHz,  $\text{CDCl}_3$ )  $\delta$  7.73 (s, 1H), 7.36 (d,  $J = 8.4$  Hz, 1H), 7.22 (d,  $J = 8.5$  Hz, 1H), 7.08 (s, 1H), 5.53 (s, 1H), 3.90 – 3.82 (m, 2H), 3.76 (s, 3H), 3.73 – 3.64 (m, 2H), 1.29 (t,  $J = 7.2$  Hz, 6H).  $^{13}\text{C NMR}$  (100 MHz,  $\text{CDCl}_3$ )  $\delta$  136.2, 128.8, 127.2, 126.5, 123.9, 113.5, 109.7, 92.1, 89.8, 86.5, 82.8, 61.0, 33.3, 15.3. The compound is new compound.

### 1-((allyloxy)methyl)-2-(3,3-diethoxyprop-1-yn-1-yl) benzene (3aa)

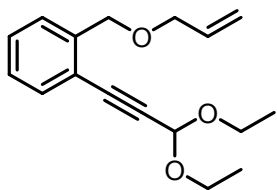

Light pink oil, yield 43%,  $^1\text{H NMR}$  (400 MHz,  $\text{CDCl}_3$ )  $\delta$  7.48 (t,  $J = 6.8$  Hz, 2H), 7.35 (t,  $J = 7.6$  Hz, 1H), 7.23 (t,  $J = 7.6$  Hz, 1H), 5.98 (ddd,  $J = 22.8, 10.8, 5.6$  Hz, 1H), 5.52 (s, 1H), 5.37 – 5.29 (m, 1H), 5.21 (dd,  $J = 10.4, 1.2$  Hz, 1H), 4.69 (s, 2H), 4.09 (dt,  $J = 5.6, 1.2$  Hz, 2H), 3.82 (m, 2H), 3.67 (m, 2H), 1.28 (t,  $J = 7.2$  Hz, 6H).  $^{13}\text{C NMR}$  (100 MHz,  $\text{CDCl}_3$ )  $\delta$  140.7, 134.8, 132.6, 129.2, 127.5, 127.3, 120.5, 117.2, 92.0, 89.1, 82.9, 71.7, 70.2, 61.1, 15.3. The compound is new compound.

**(8*R*,9*S*,13*S*,14*S*)-3-(3-ethoxy-4-methoxybut-1-yn-1-yl)-13-methyl-6,7,8,9,11,12,13,14,15,16-decahydro-17*H*-cyclopenta[*a*]phenanthren-17-one (3ab)**

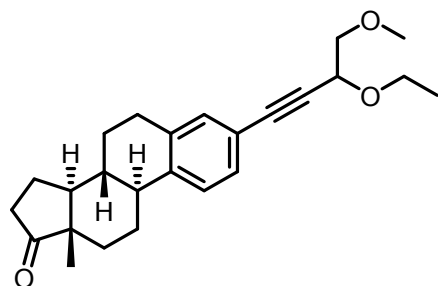

Yellowish oil, yield 27%,

**<sup>1</sup>H NMR** (400 MHz, CDCl<sub>3</sub>)  $\delta$  7.26 (s, 1H), 7.23 (d,  $J = 3.6$  Hz, 2H), 5.48 (s, 1H), 3.82 (tt,  $J = 14.4, 7.2$  Hz, 2H), 3.71 – 3.61 (m, 2H), 2.88 (dd,  $J = 8.8, 4.0$  Hz, 2H), 2.51 (dd,  $J = 18.8, 8.8$  Hz, 1H), 2.44 – 2.36 (m, 1H), 2.29 (t,  $J = 8.4$  Hz, 1H), 2.16 (dd,  $J = 18.4, 9.2$  Hz, 1H), 2.11 – 1.94 (m, 3H), 1.69 – 1.62 (m, 1H), 1.49 (tdd,  $J = 24.8, 15.2, 9.6$  Hz, 5H), 1.27 (t,  $J = 7.2$  Hz, 6H), 0.91 (s, 3H). **<sup>13</sup>C NMR** (100 MHz, CDCl<sub>3</sub>)  $\delta$  220.9, 140.9, 136.7, 132.6, 129.4, 125.5, 119.3, 92.0, 85.5, 83.9, 61.0, 50.6, 48.1, 44.6, 38.1, 36.0, 31.7, 29.2, 26.4, 25.7, 21.7, 15.3, 14.0. The compound is new compound.

**3-(3,3-diethoxyprop-1-yn-1-yl) phenyl palmitate (3ac)**

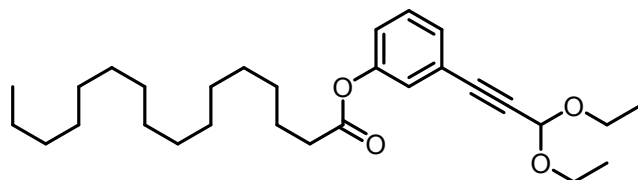

Colourless oil, yield 30%, **<sup>1</sup>H NMR** (400 MHz, CDCl<sub>3</sub>)  $\delta$  7.31 (d,  $J = 8.0$  Hz, 2H), 7.20 (s, 1H), 7.06 (d,  $J = 6.4$  Hz, 1H), 5.47 (s, 1H), 3.86 – 3.76 (m, 2H), 3.70 – 3.61 (m, 2H), 2.54 (t,  $J = 7.6$  Hz, 2H), 1.79 – 1.70 (m, 2H), 1.26 (s, 30H), 0.88 (t,  $J = 6.4$  Hz, 3H). **<sup>13</sup>C NMR** (100 MHz, CDCl<sub>3</sub>)  $\delta$  172.1, 150.6, 129.3, 129.3, 125.2, 123.3, 122.5, 91.8, 85.3, 84.3, 61.1, 34.5, 32.1, 29.7, 29.7, 29.7, 29.6, 29.5, 29.4, 29.3, 29.1, 25.0, 22.8, 15.2, 14.3. The compound is new compound.

**3-(*m*-tolyl)propionaldehyde (3ad)**

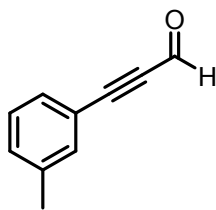

Brown oil, yield 48%,  $^1\text{H NMR}$  (400 MHz,  $\text{CDCl}_3$ )  $\delta$  9.74 (s, 1H), 7.77 – 7.71 (m, 2H), 7.62 (d,  $J = 5.2$  Hz, 2H), 2.69 (s, 3H).  $^{13}\text{C NMR}$  (100 MHz,  $\text{CDCl}_3$ )  $\delta$  176.9, 138.7, 133.9, 132.4, 130.6, 128.7, 119.3, 95.7, 88.4, 21.3. NMR data were in close agreement with the literature<sup>3</sup>.

### 3-(4-(tert-butyl)phenyl)prop-2-ynal (3ae)

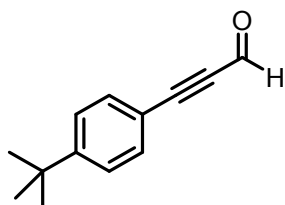

Brown oil, yield 45%,  $^1\text{H NMR}$  (400 MHz,  $\text{CDCl}_3$ )  $\delta$  9.41 (s, 1H), 7.55 (d,  $J = 8.4$  Hz, 2H), 7.43 (d,  $J = 8.4$  Hz, 2H), 1.33 (s, 9H).  $^{13}\text{C NMR}$  (100 MHz,  $\text{CDCl}_3$ )  $\delta$  177.0, 155.3, 133.4, 126.0, 116.4, 96.1, 88.6, 35.3, 31.1. The compound is new compound.

### 8 Another proposed mechanism.

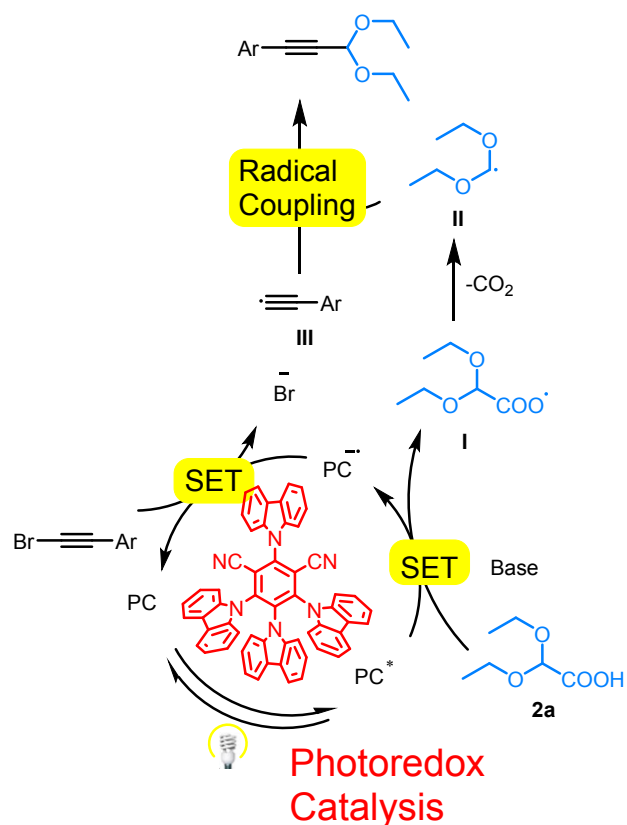

**Scheme S1. Another proposed mechanism**

The other plausible mechanism for the reaction is shown in Scheme S1. The metal-free photocatalyst 4CzIPN is irradiated to its photoexcited state 4CzIPN\* under 5W blue LEDs. With the help of Cs<sub>2</sub>CO<sub>3</sub>, the readily available 2, 2-diethoxyacetic acid [Eox (2a Cs salt) = +0.95V vs. SCE]<sup>4</sup> is easily oxidized to produce carboxyl radical intermediate **I** by 4CzIPN\* due to its featured higher redox potential [E (PC\*/PC<sup>-</sup>) = +1.35V vs. SCE]<sup>5</sup>. **I** then removes one molecule of CO<sub>2</sub> to form a 2, 2-diethoxyacetal radical **II**. At the same time, arylethynyl bromide undergoes a SET process to produce an arylethynyl radical **III**<sup>6</sup> and a bromine anion by the photocatalyst in a reduced state [E (PC/PC<sup>-</sup>) = -1.21 V vs. SCE]<sup>4</sup>, and the photocatalyst completes the cycle. Finally, the radical-radical cross-coupling between **II** and **III** provides the cross-coupling product.

## 9. References

1. Z.-S. Ye, M.-C. Liu, B.-D. Lin, H.-Y. Wu, J.-C. Ding, J. Cheng. *Tetrahedron Lett.* **2009**, *50*, 530.
2. M. Lemhadri, H. Doucet, M. Santelli. *Tetrahedron* **2005**, *61*, 9839.
3. S. Belot, K. A. Vogt, C. Besnard, N. Krause, A. Alexakis. *Angew. Chem. Int. Ed.* **2009**, *48*, 8923.
4. H. Huang, X.-M. Li, C.-G. Yu, Y.-T. Zhang, P. S. Mariano and W. Wang *Angew. Chem., Int. Ed.* **2017**, *56*, 1500-1505.

5. J. Luo and J. Zhang, *ACS Catal.* **2016**, *6*, 873-877.

6. (a) Y.-C. Zhao, J.-W. Jin and P. W. H. Chan, *Adv. Synth. Catal.* 2019, *361*, 1313-1321. (b) K. Ni, L.-G. Meng, K. Wang and L. Wang, *Org. Lett.* **2018**, *20*, 2245-2248.

### 10. Copies of $^1\text{H}$ NMR $^{13}\text{C}$ NMR and $^{19}\text{F}$ NMR spectra for compounds

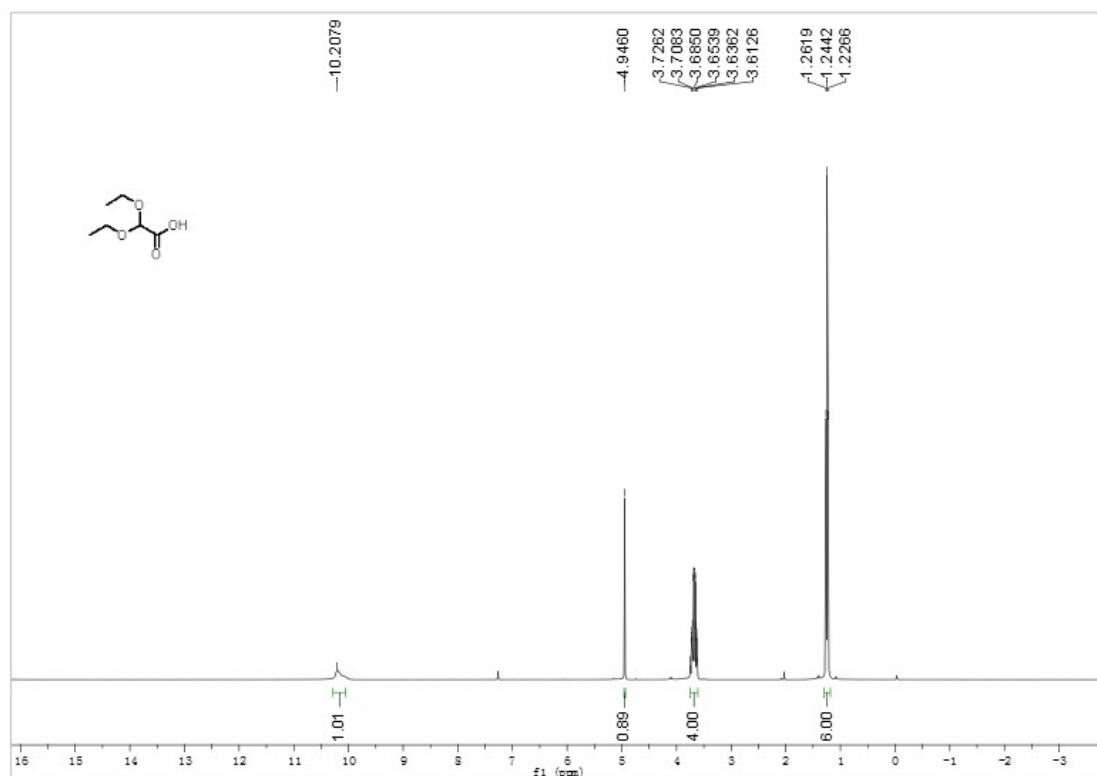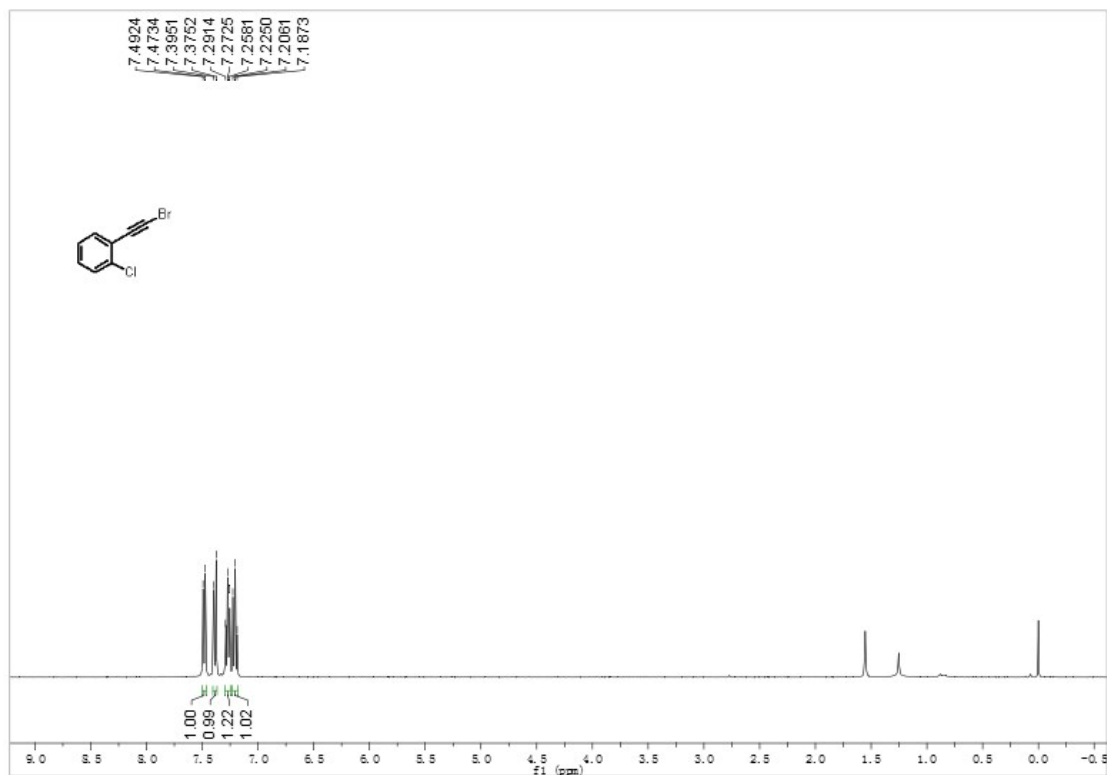

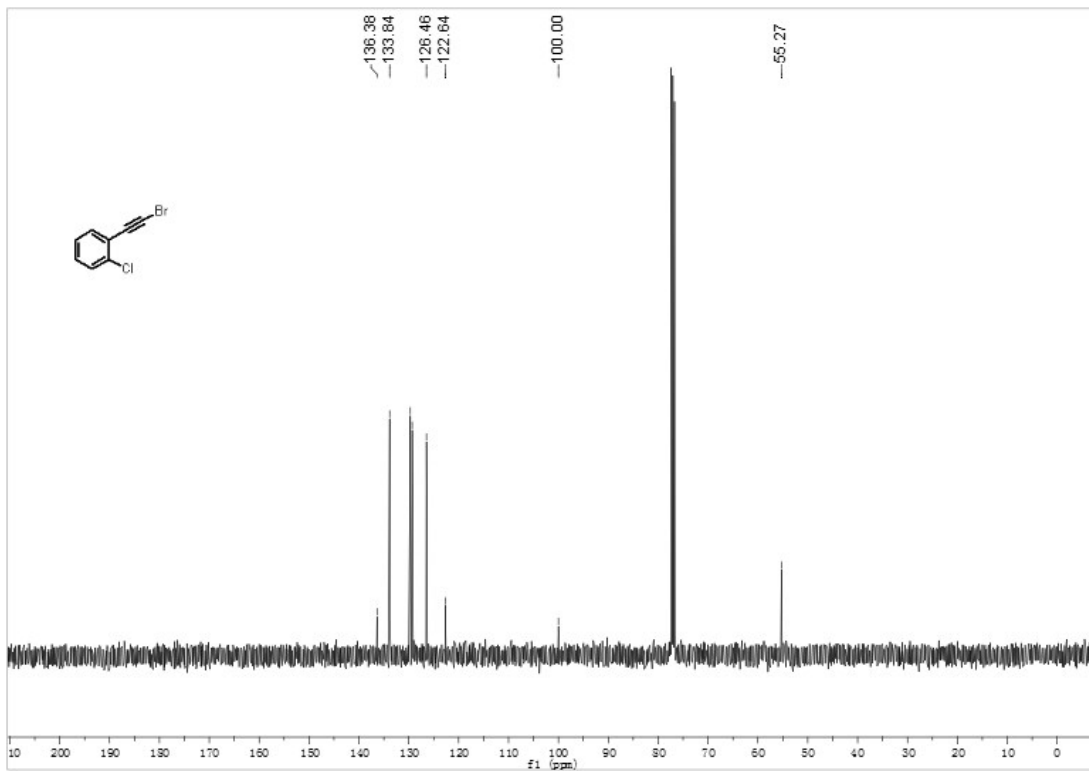

7.8953  
7.8770  
7.7949  
7.7702  
7.6967  
7.6764  
7.6151  
7.5968  
7.5785  
7.5471  
7.5275  
7.5097  
7.3652  
7.3456  
7.3256  
7.2700  
7.2507

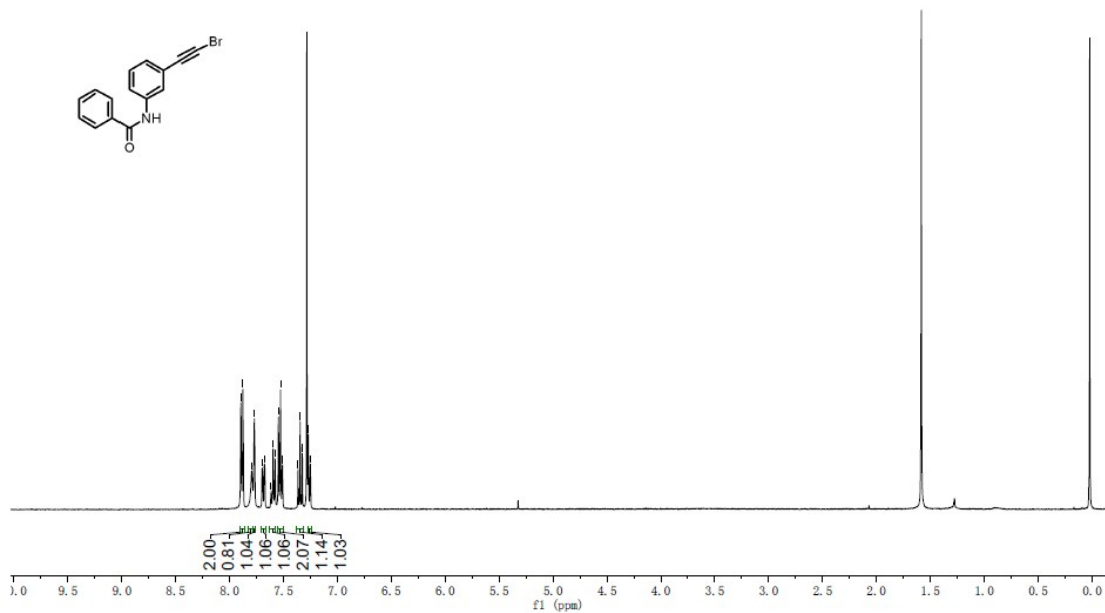



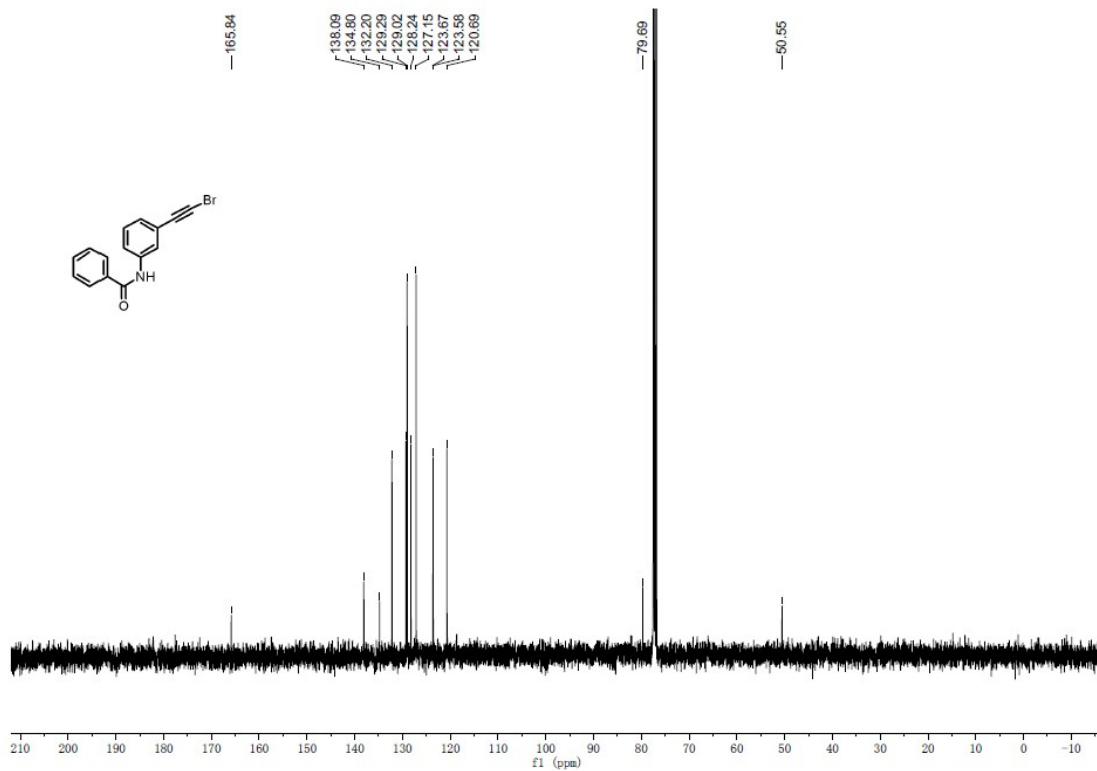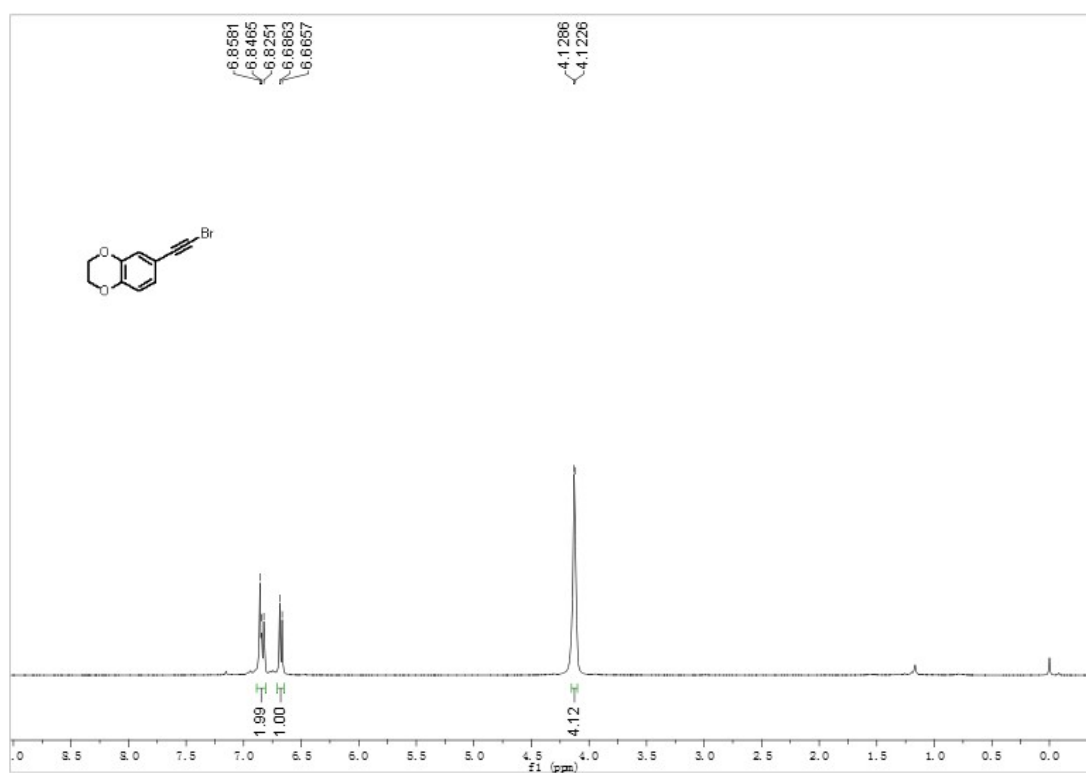

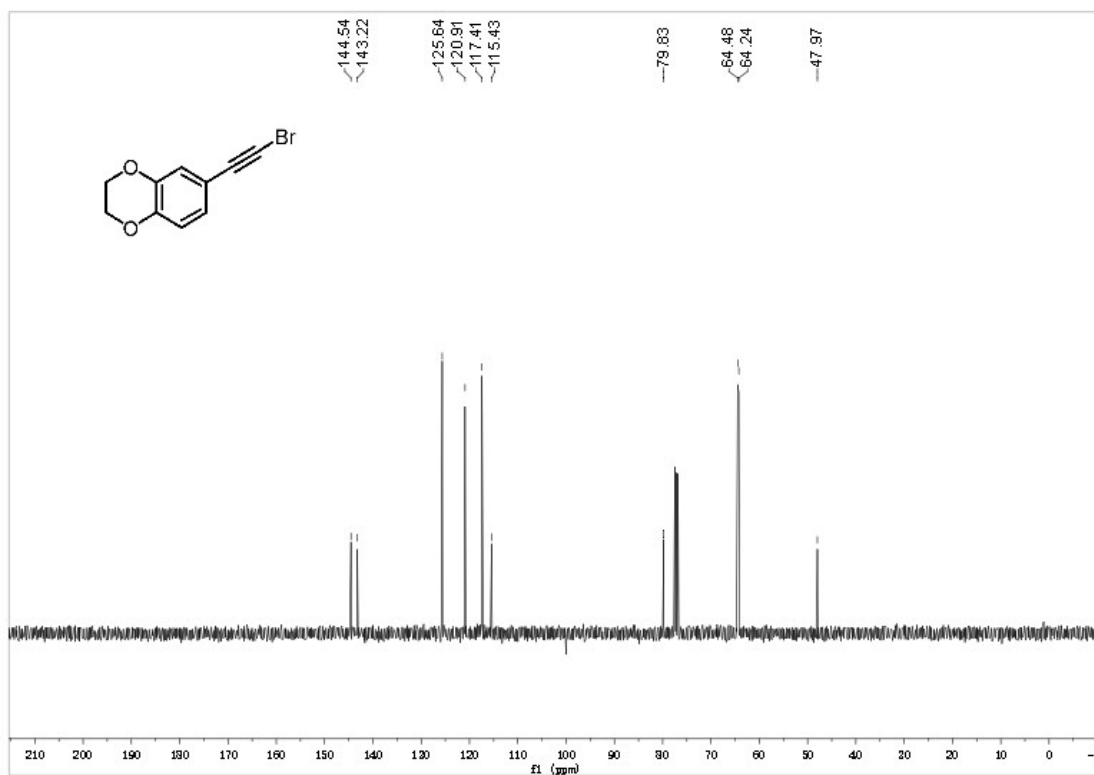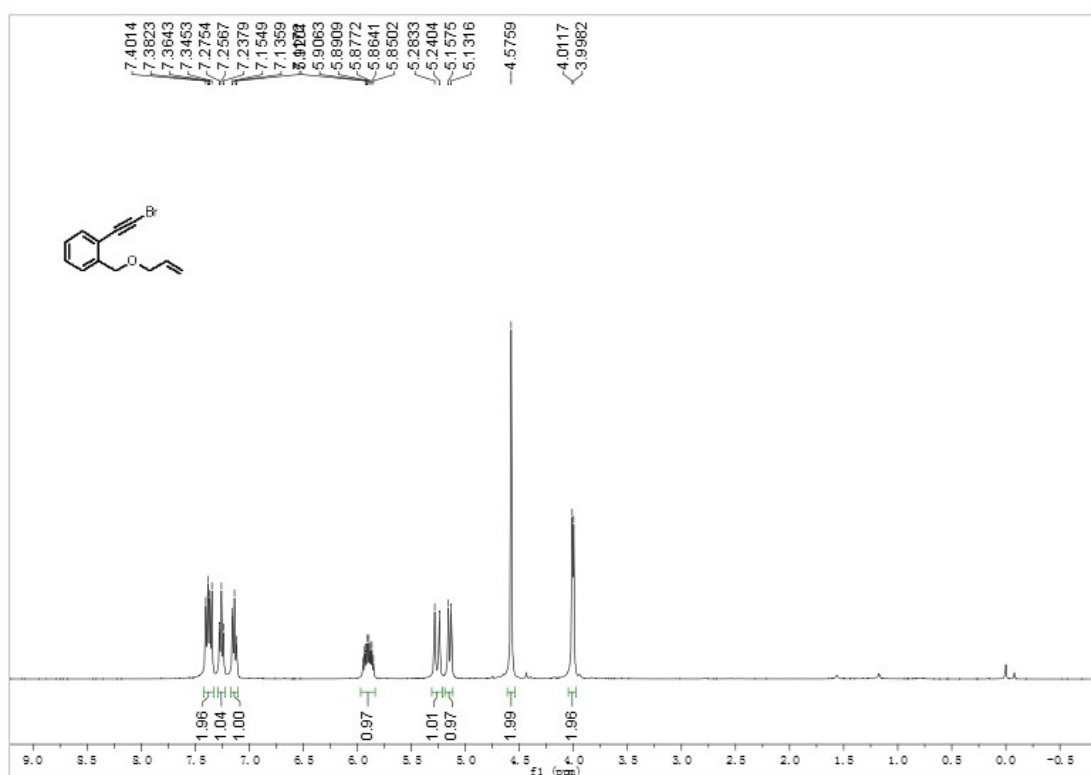

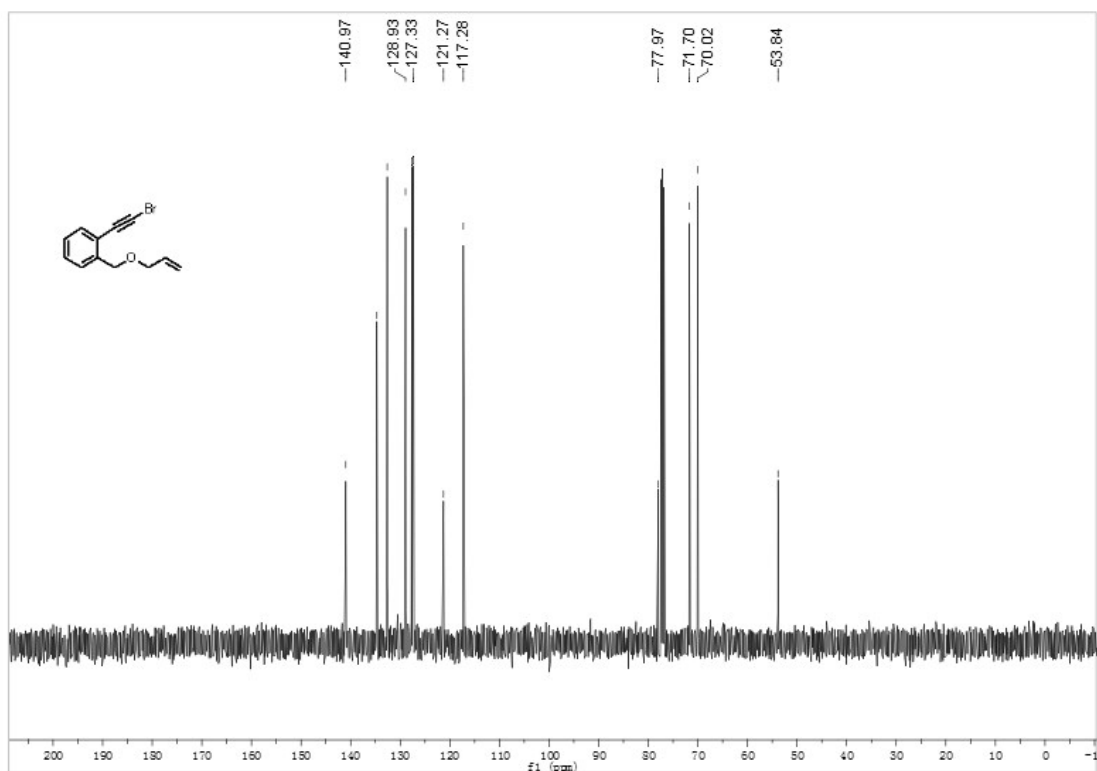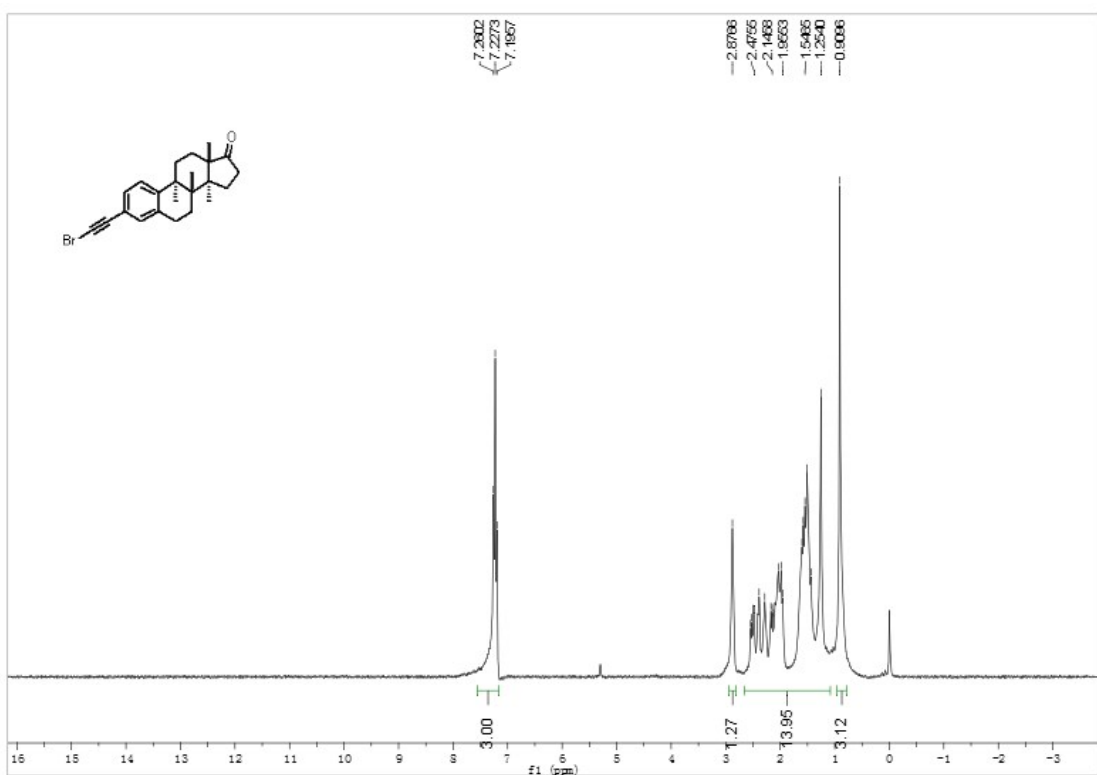

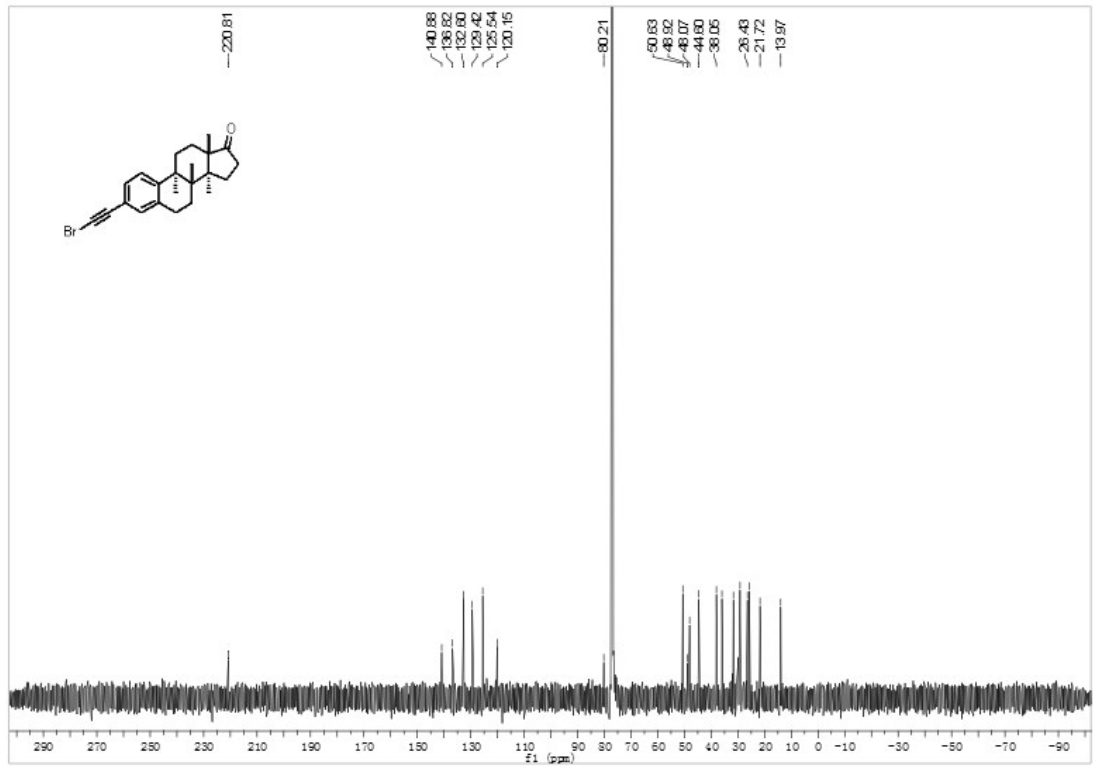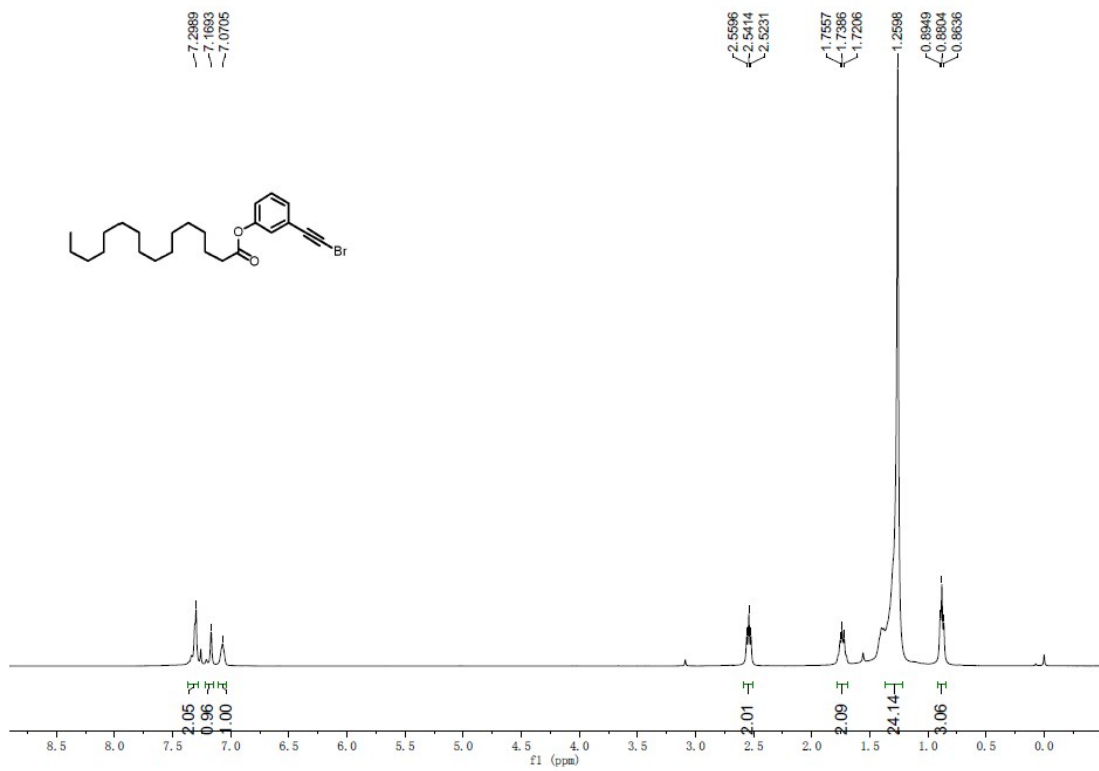

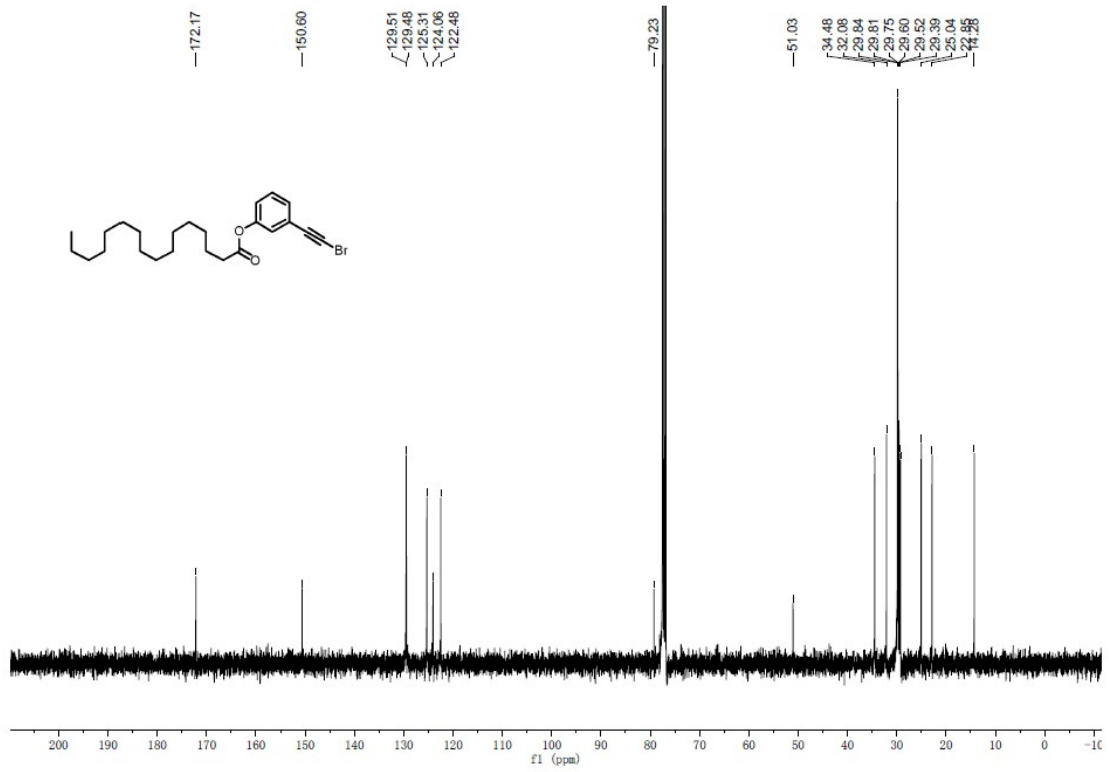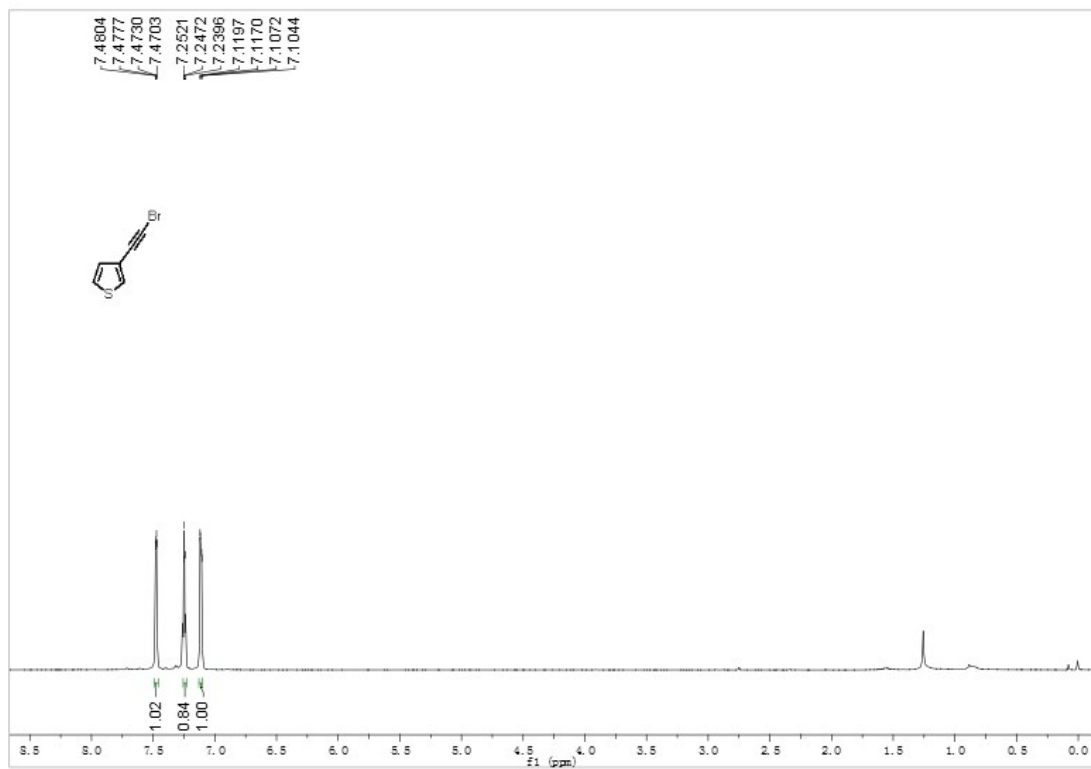

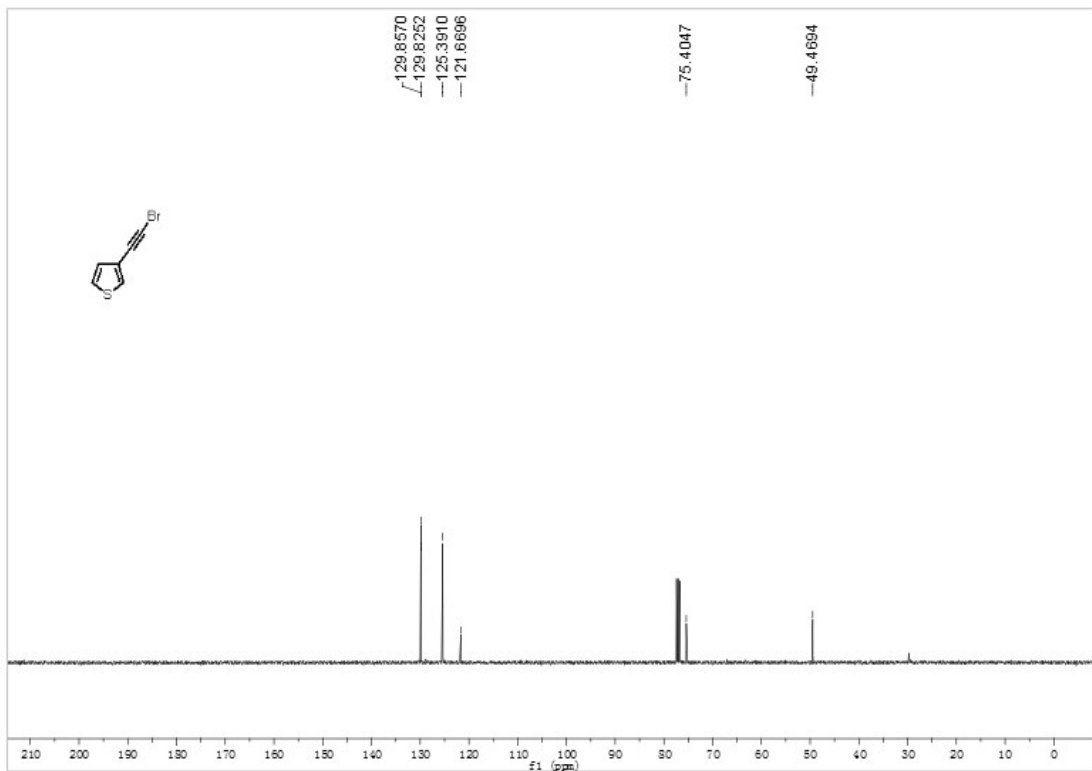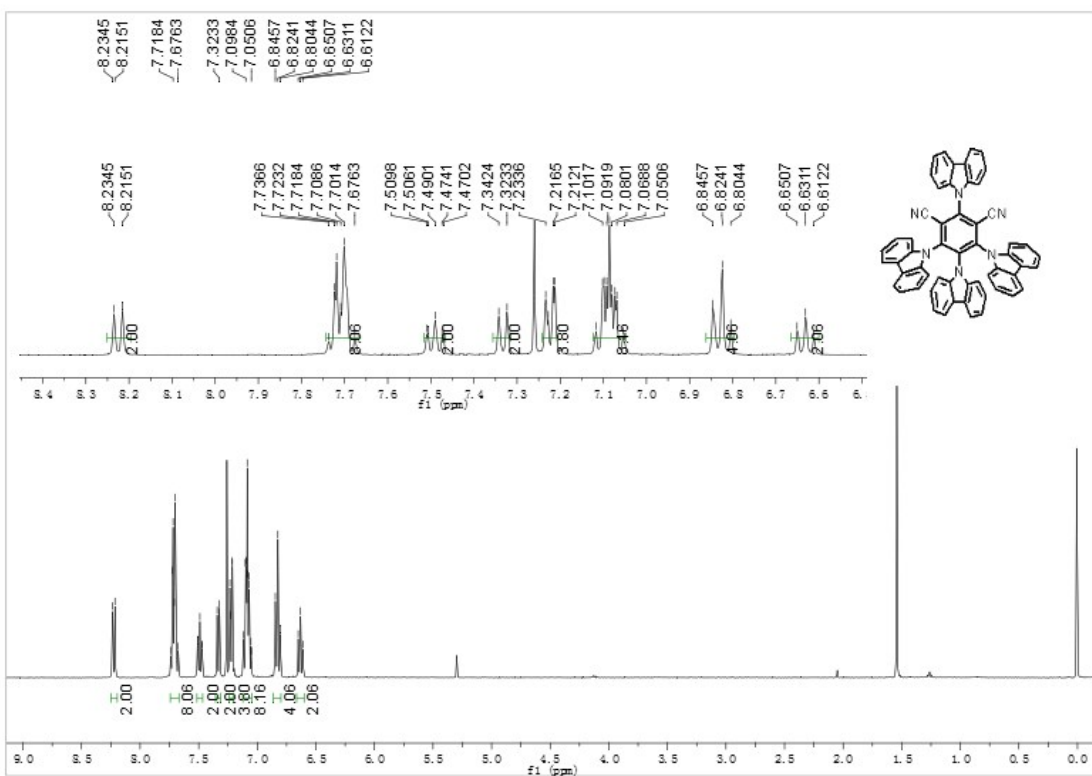

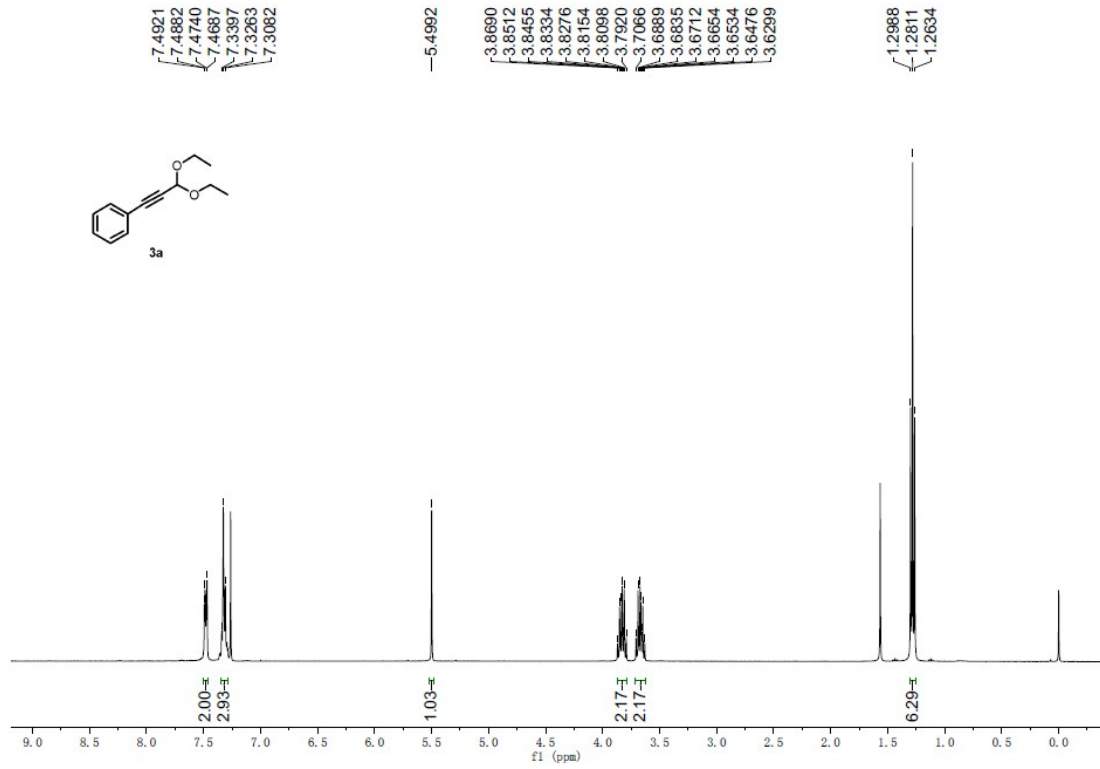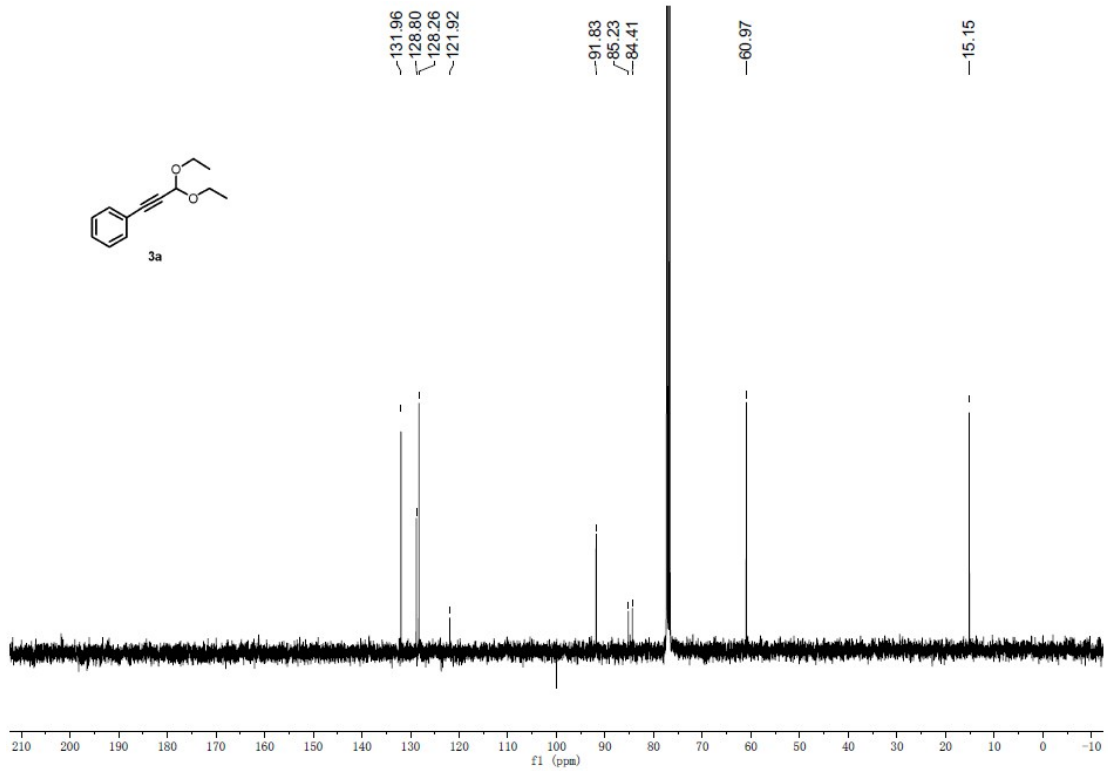

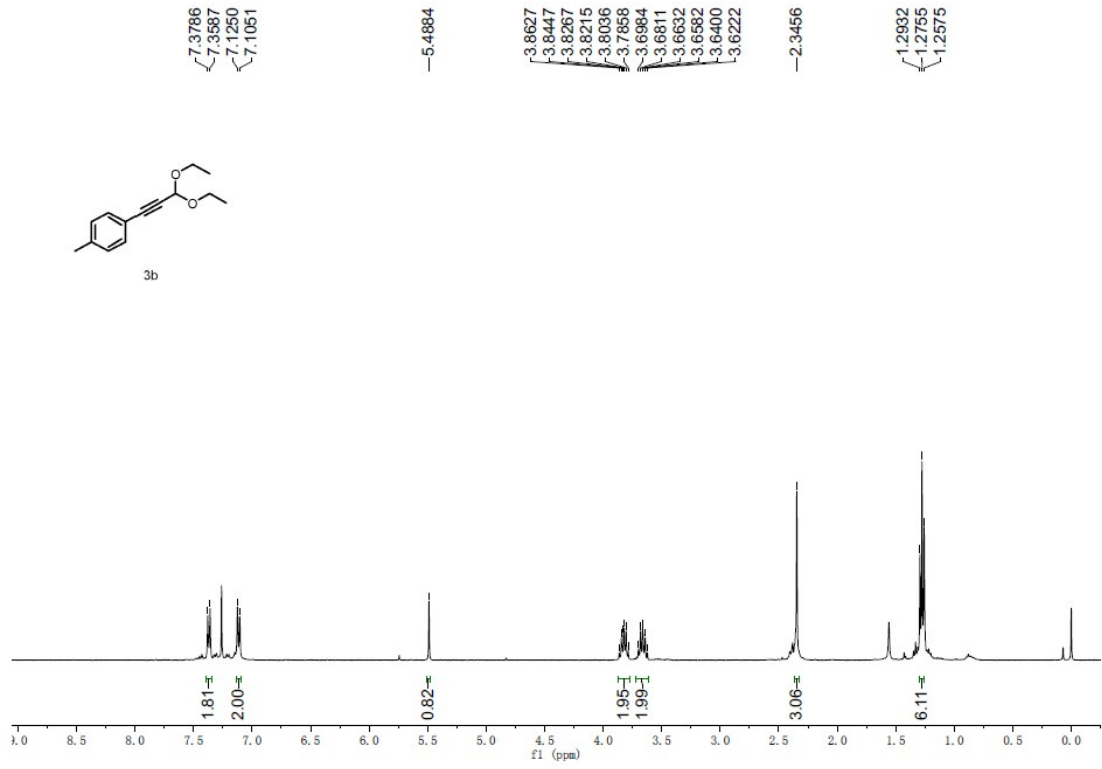



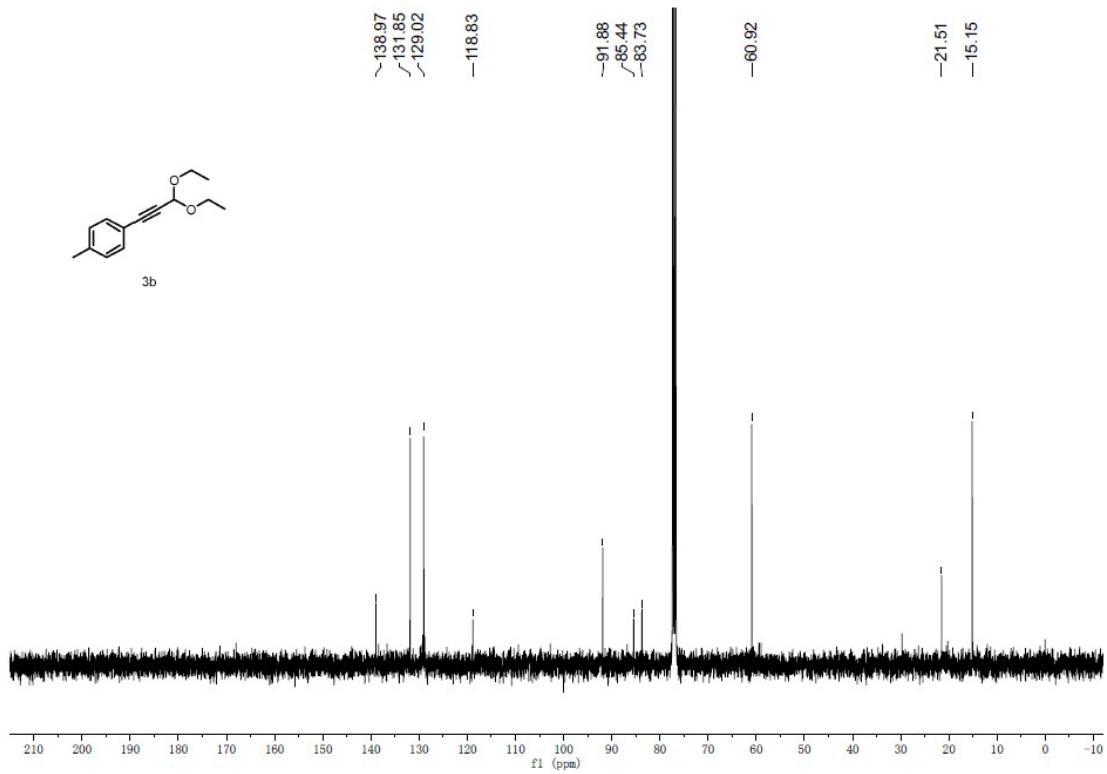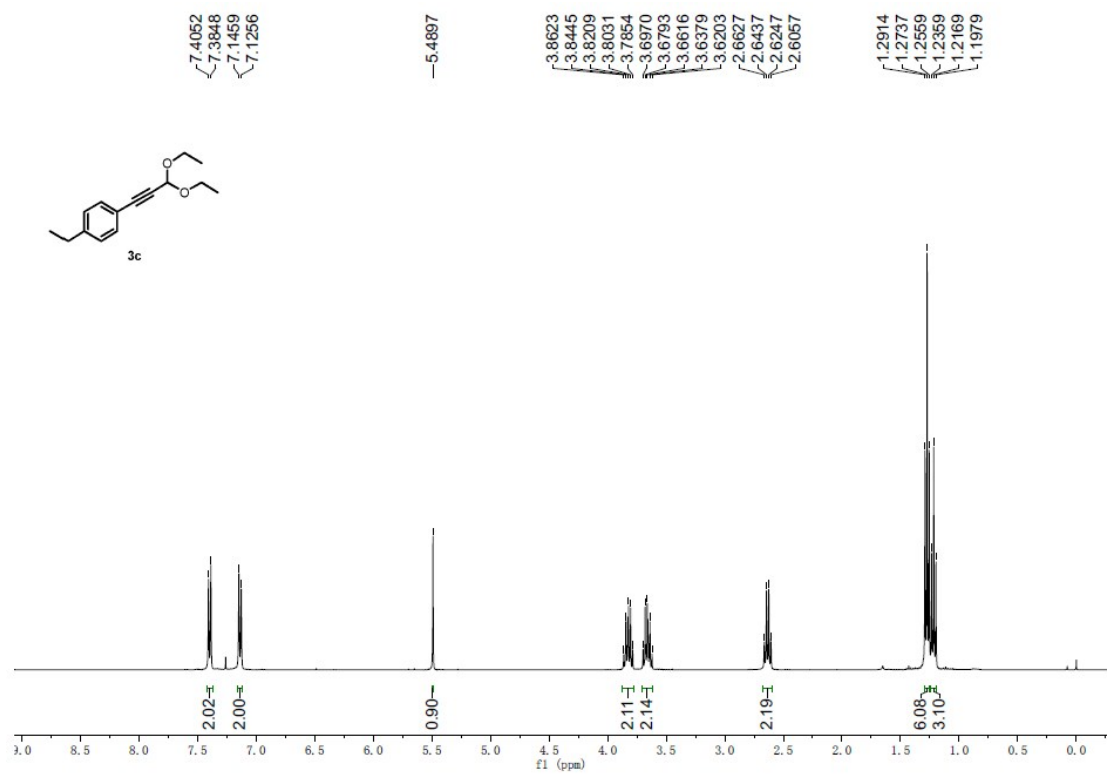

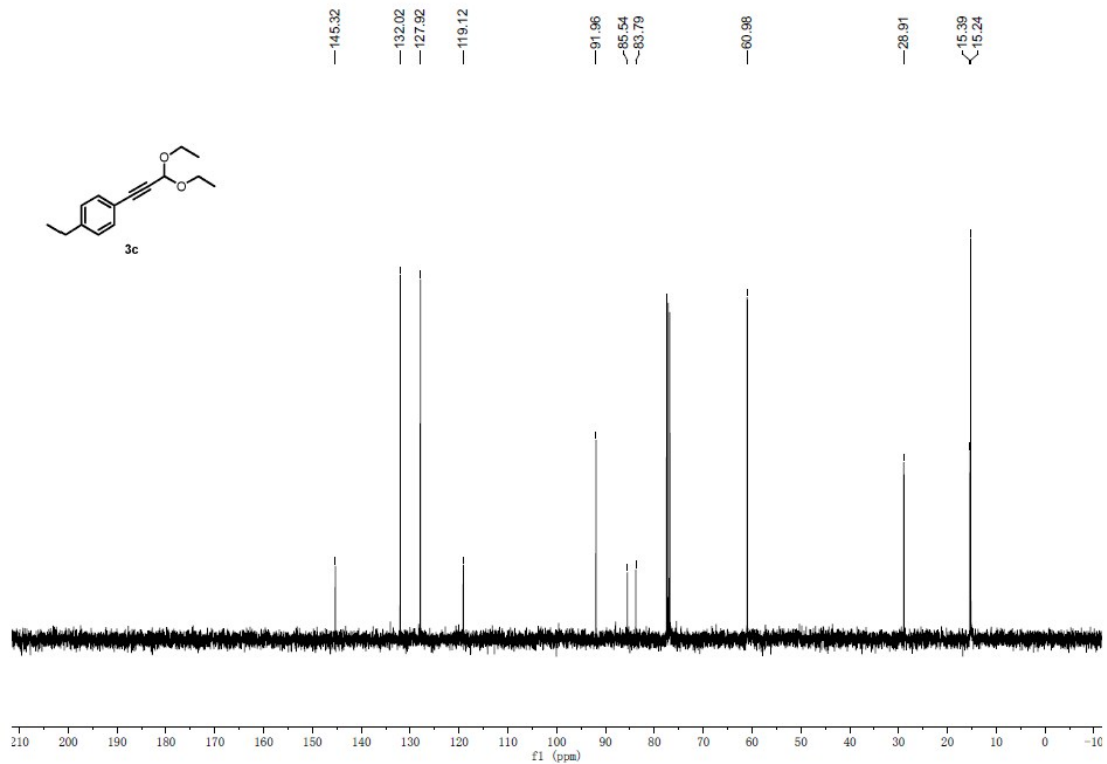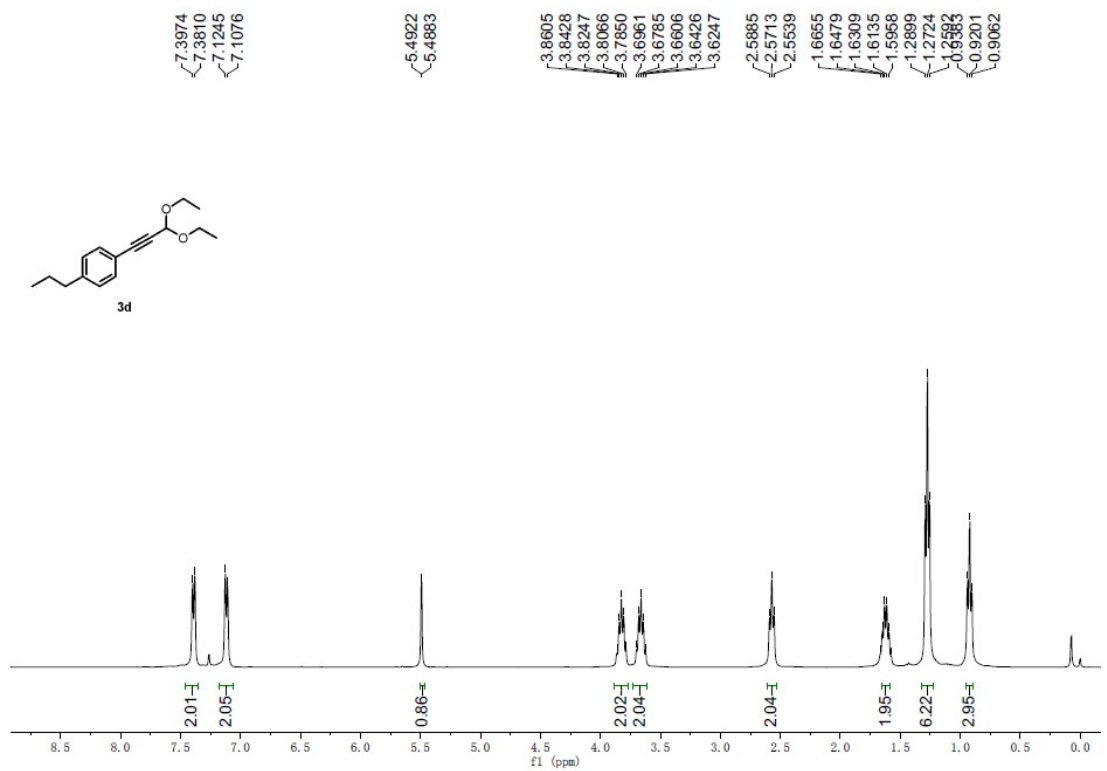

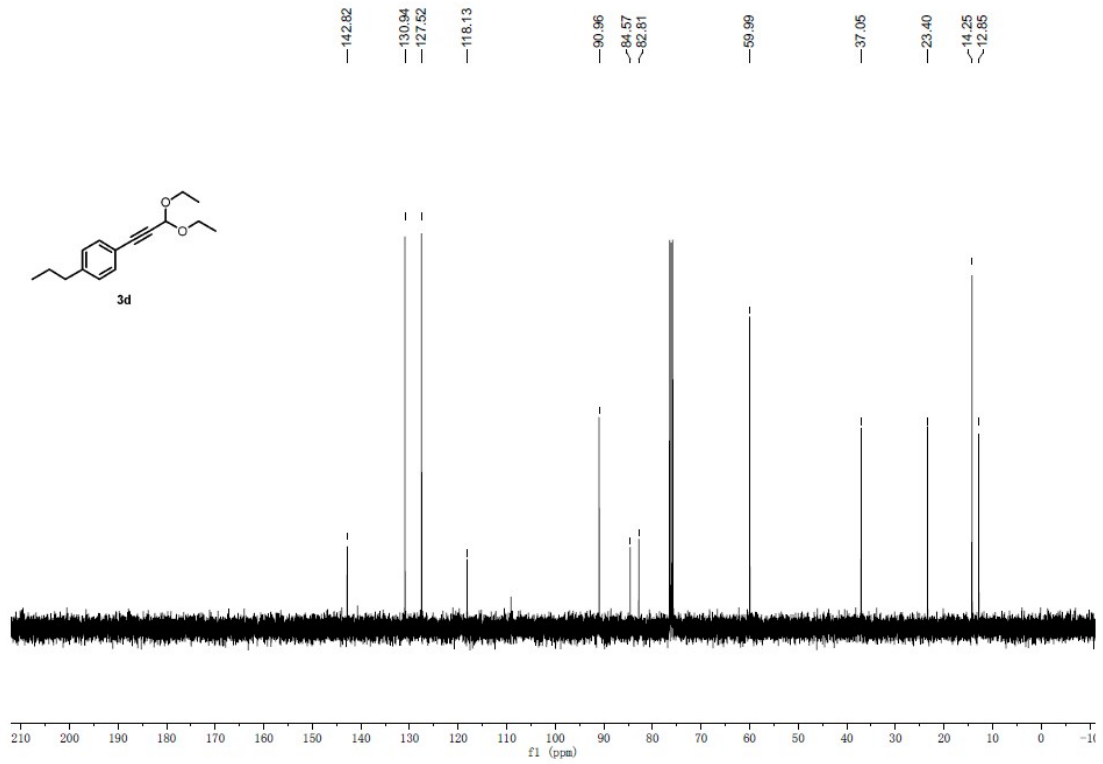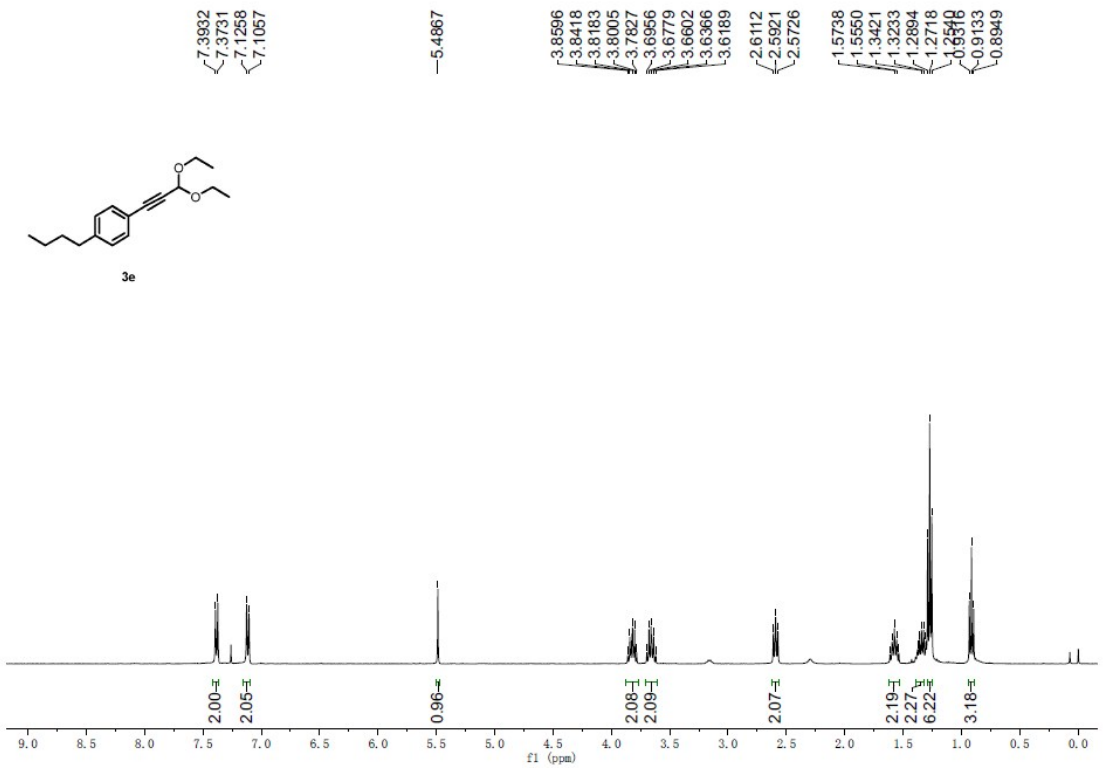

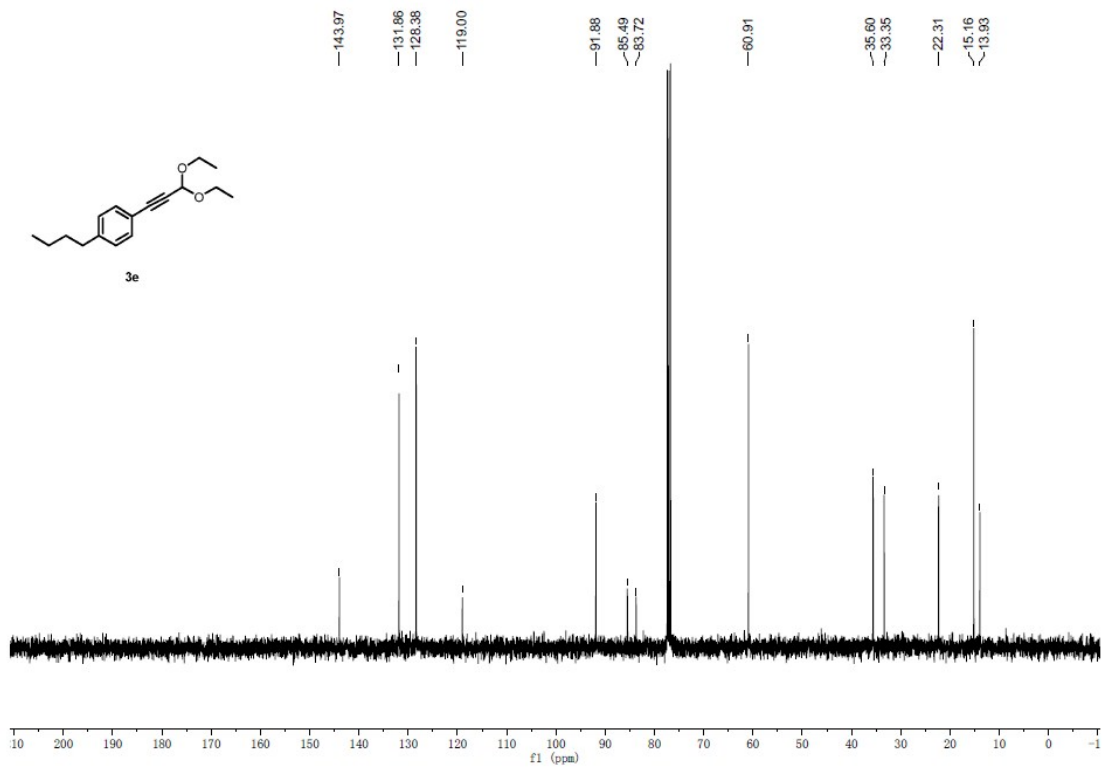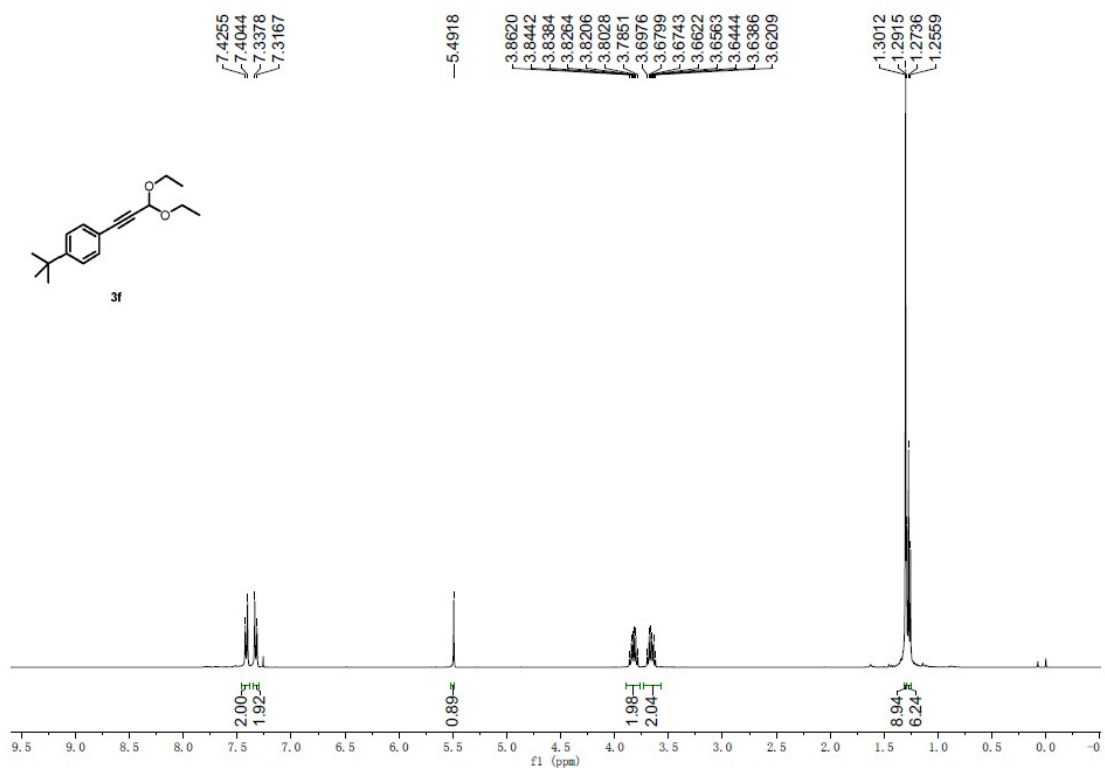

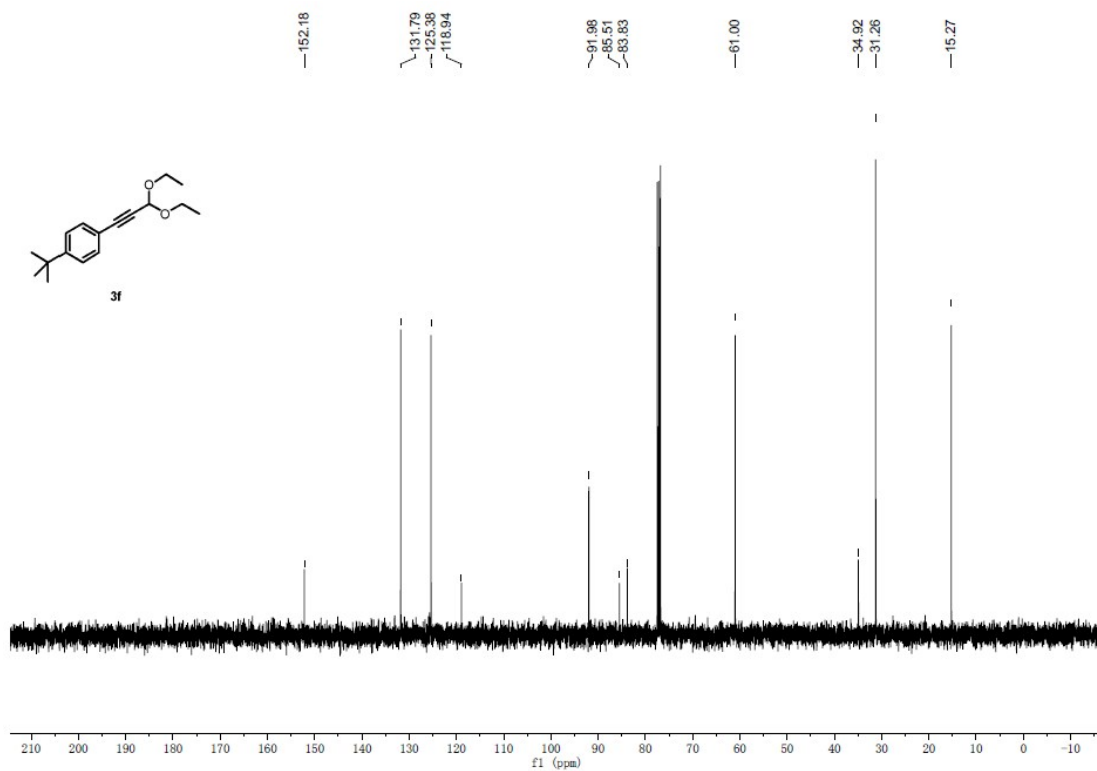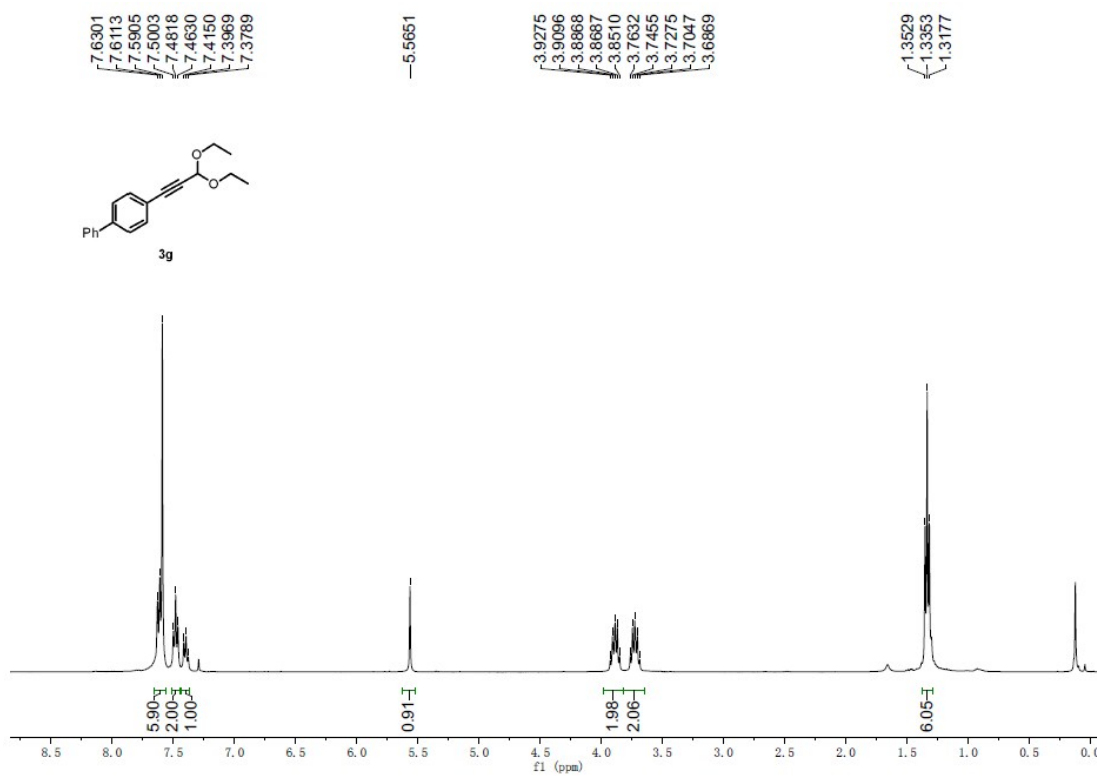

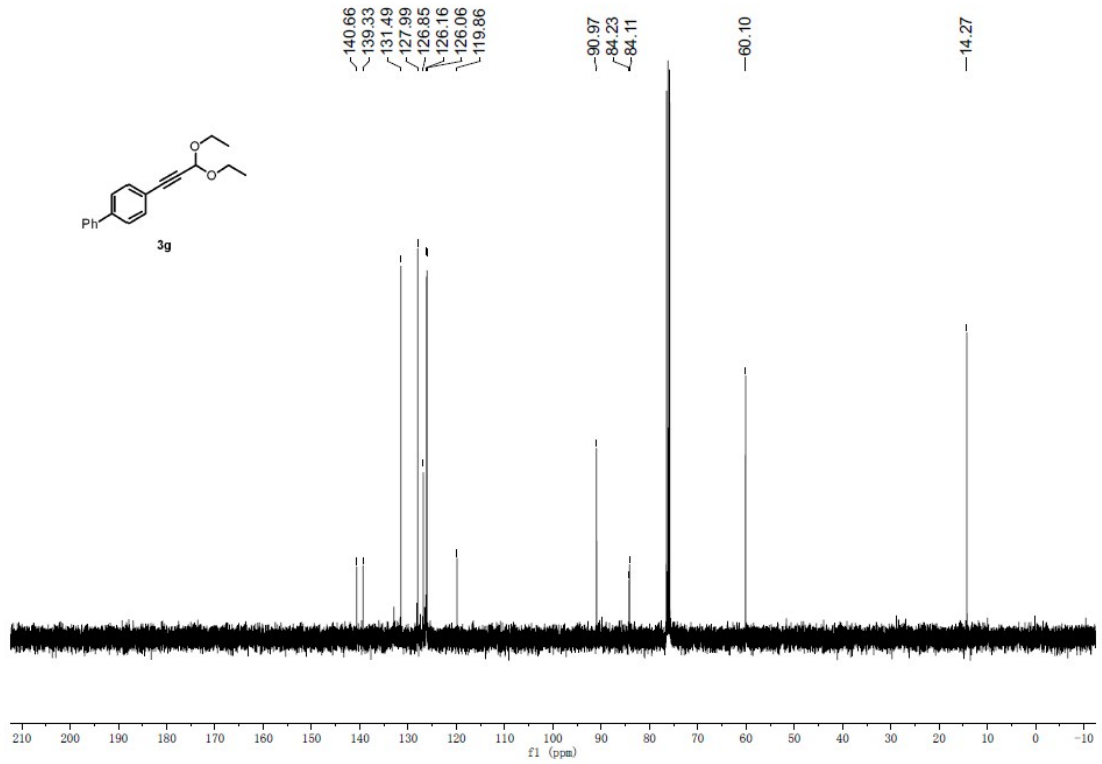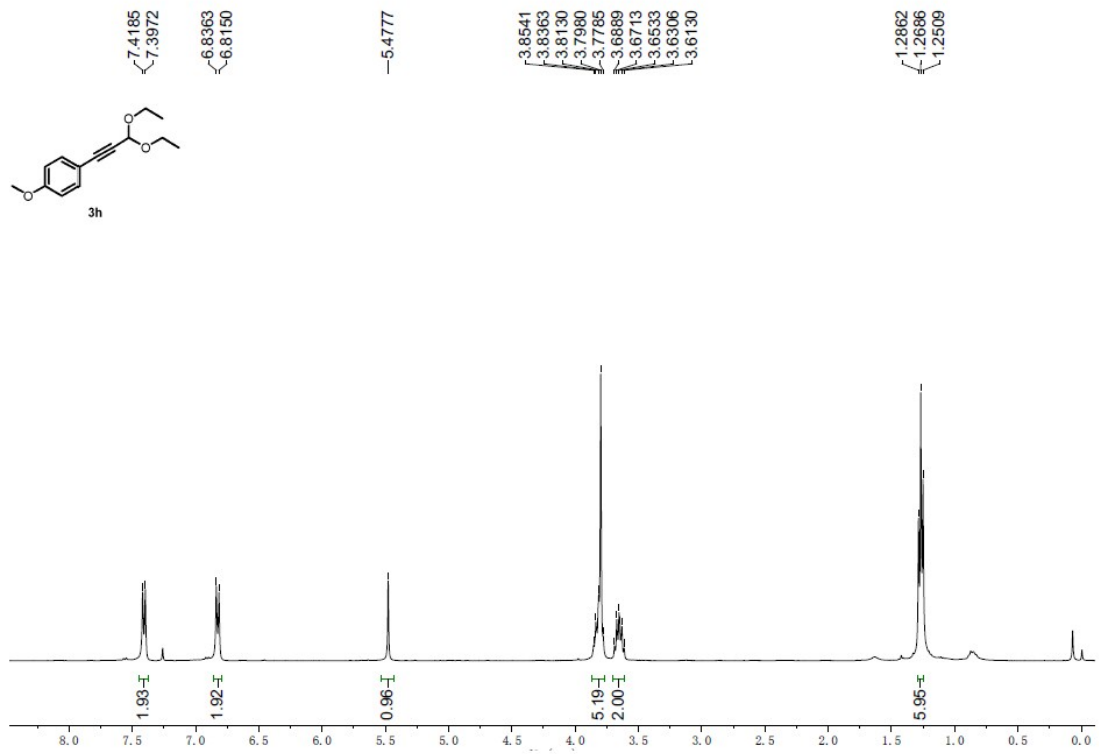

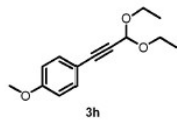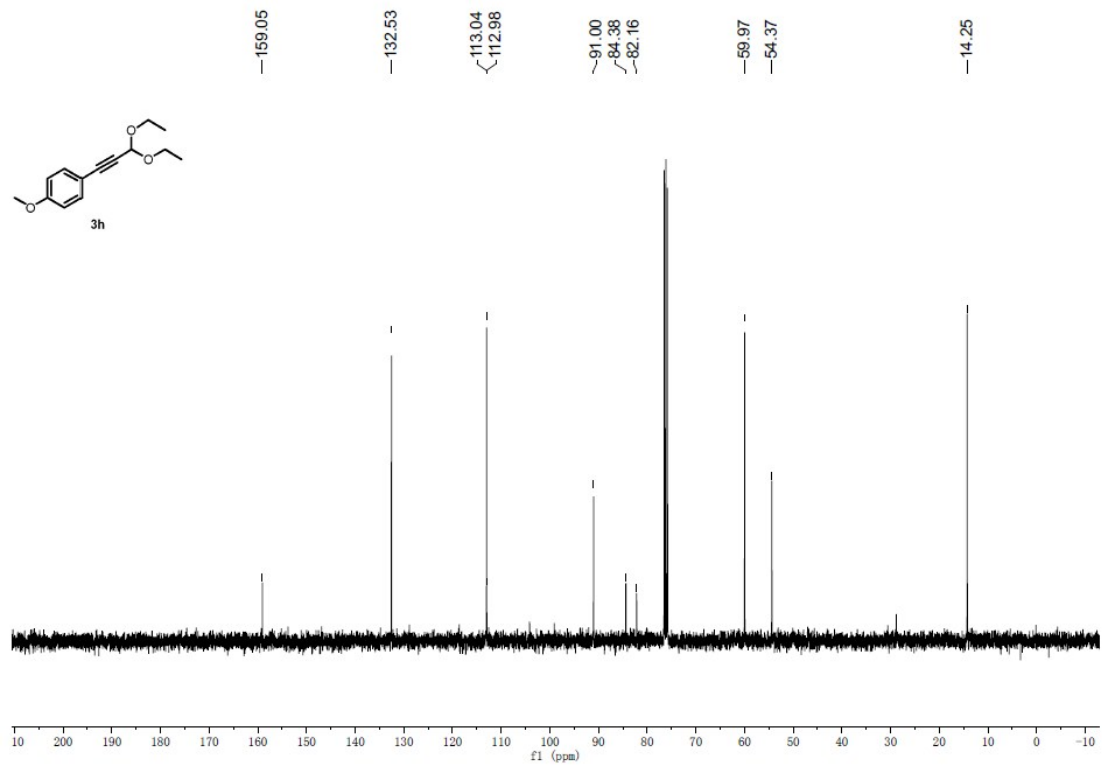

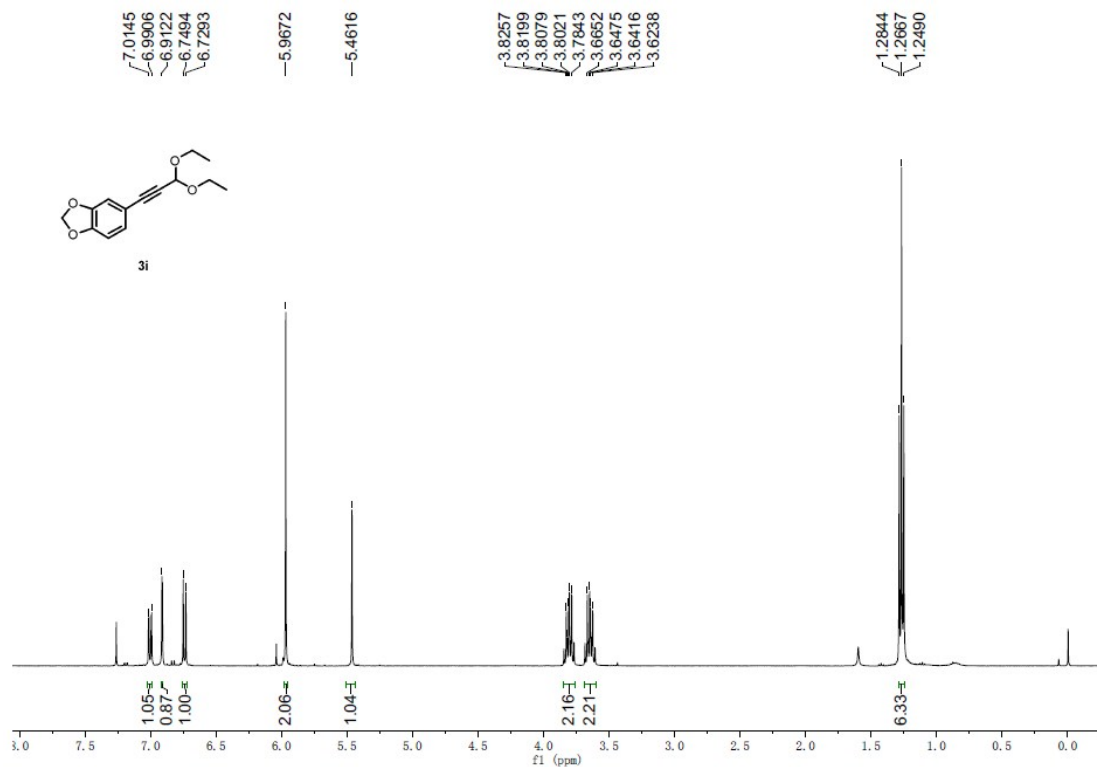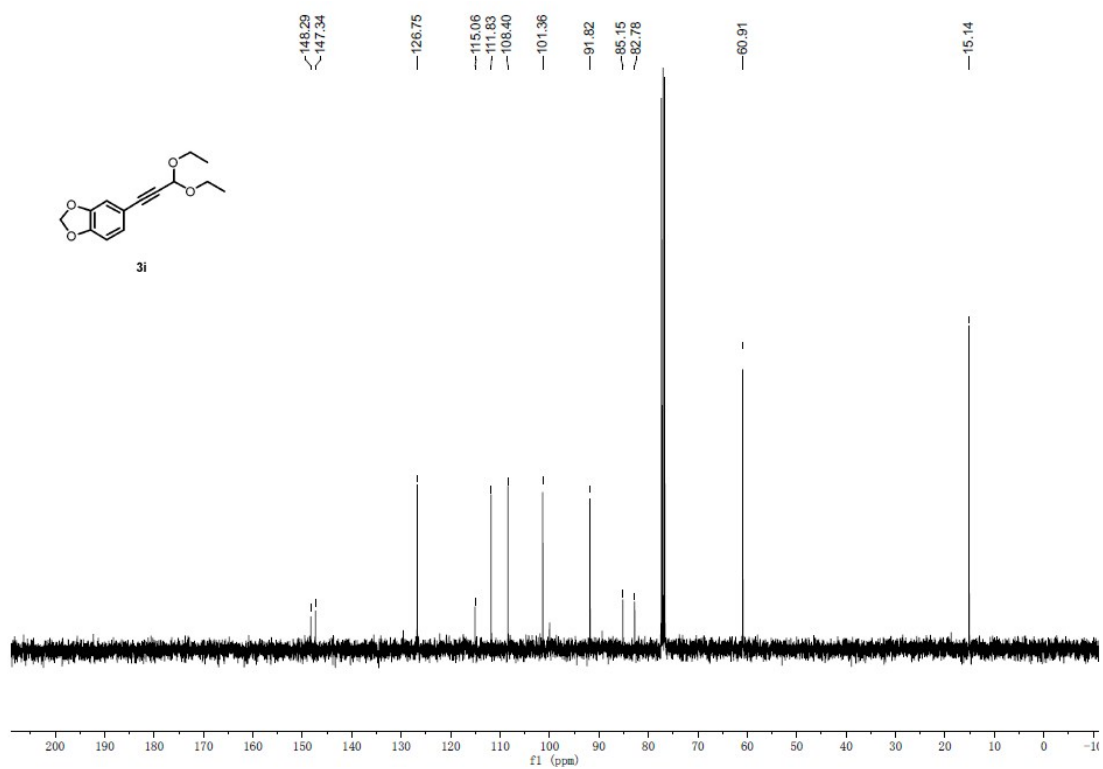



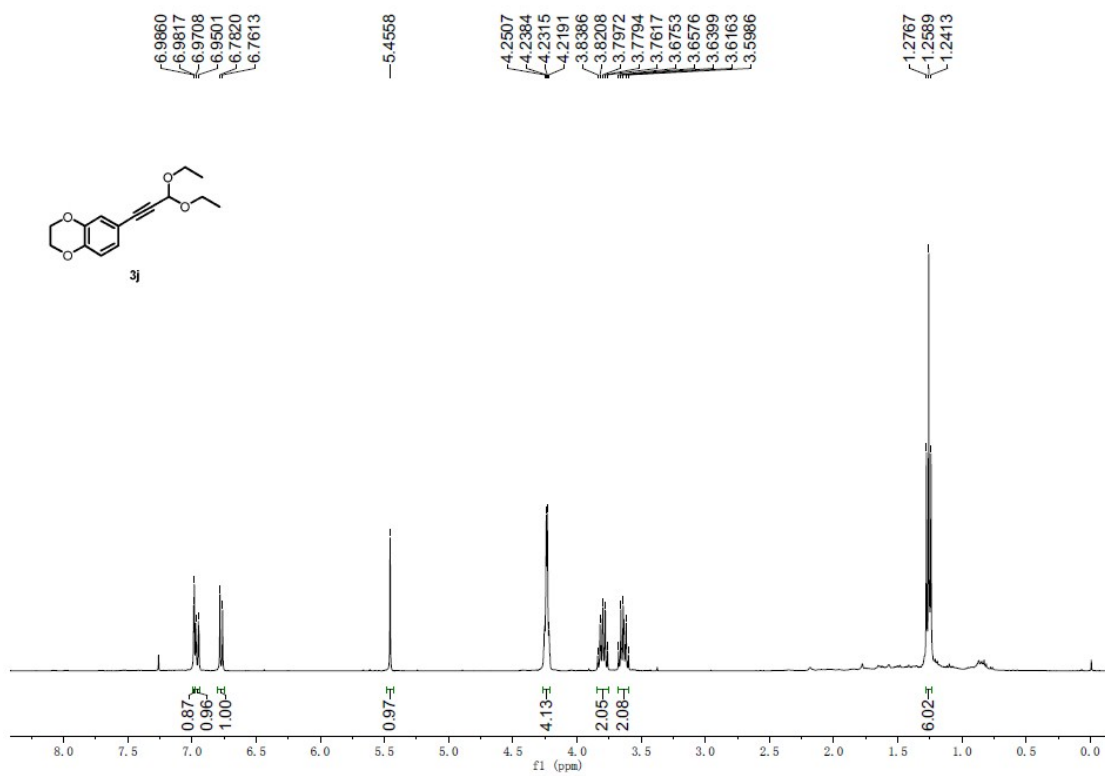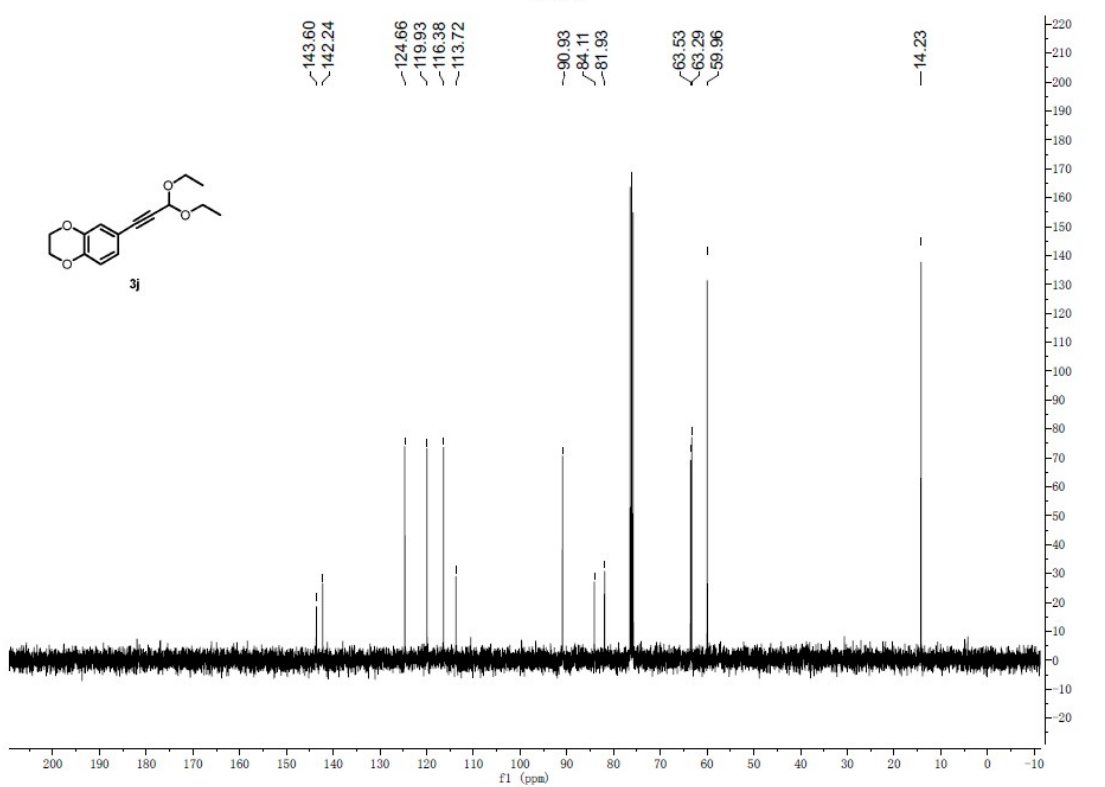

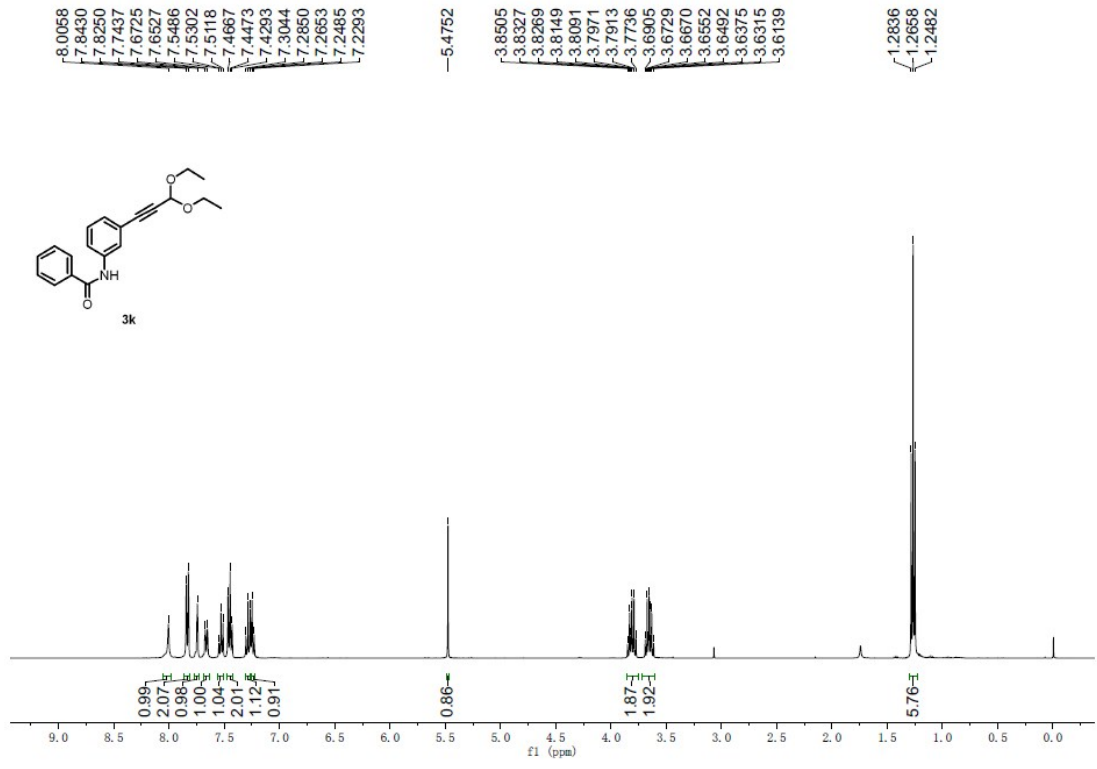

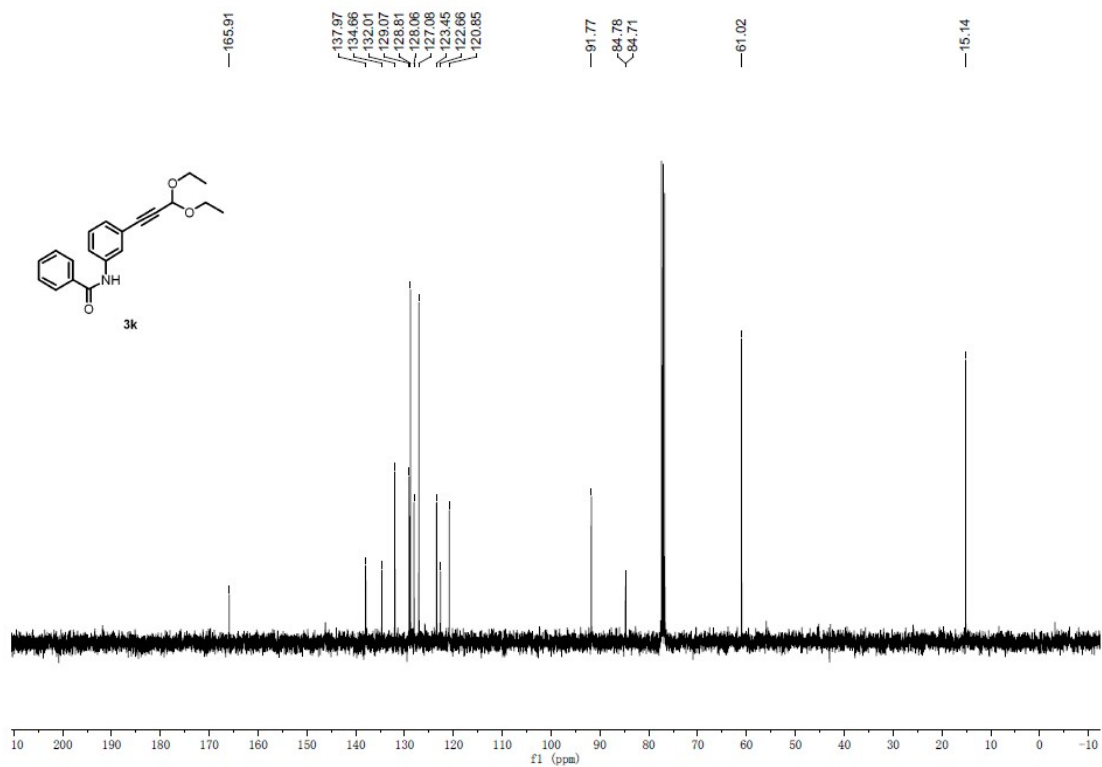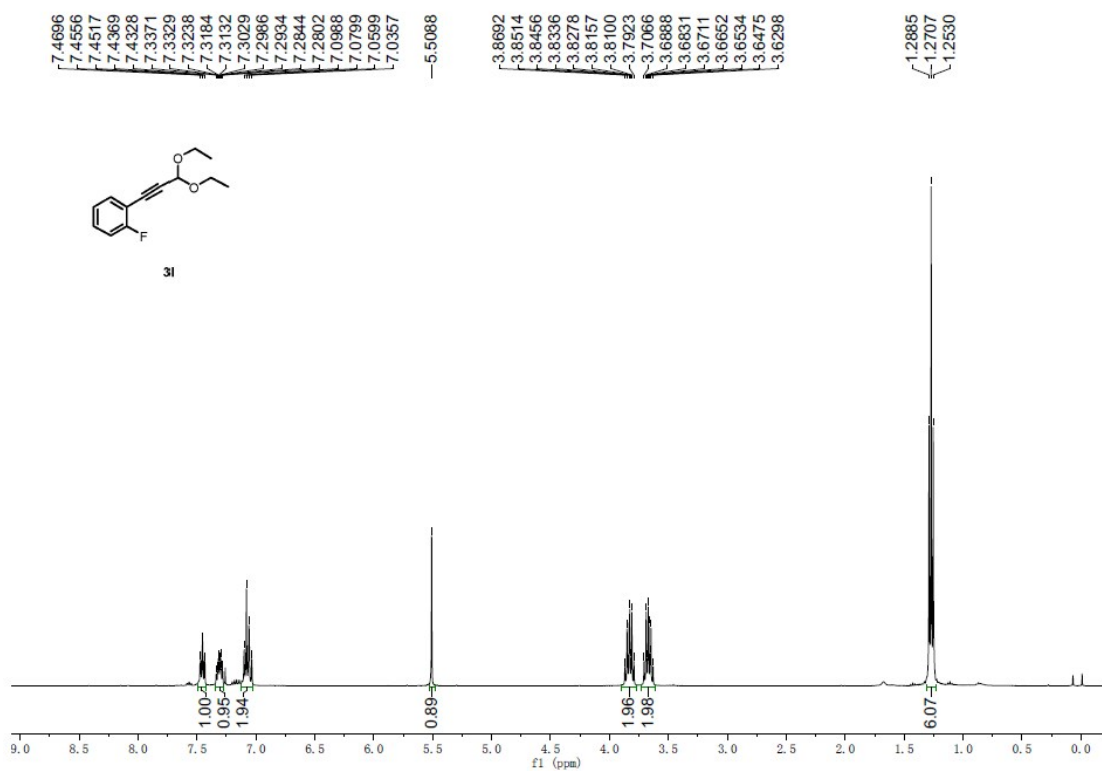

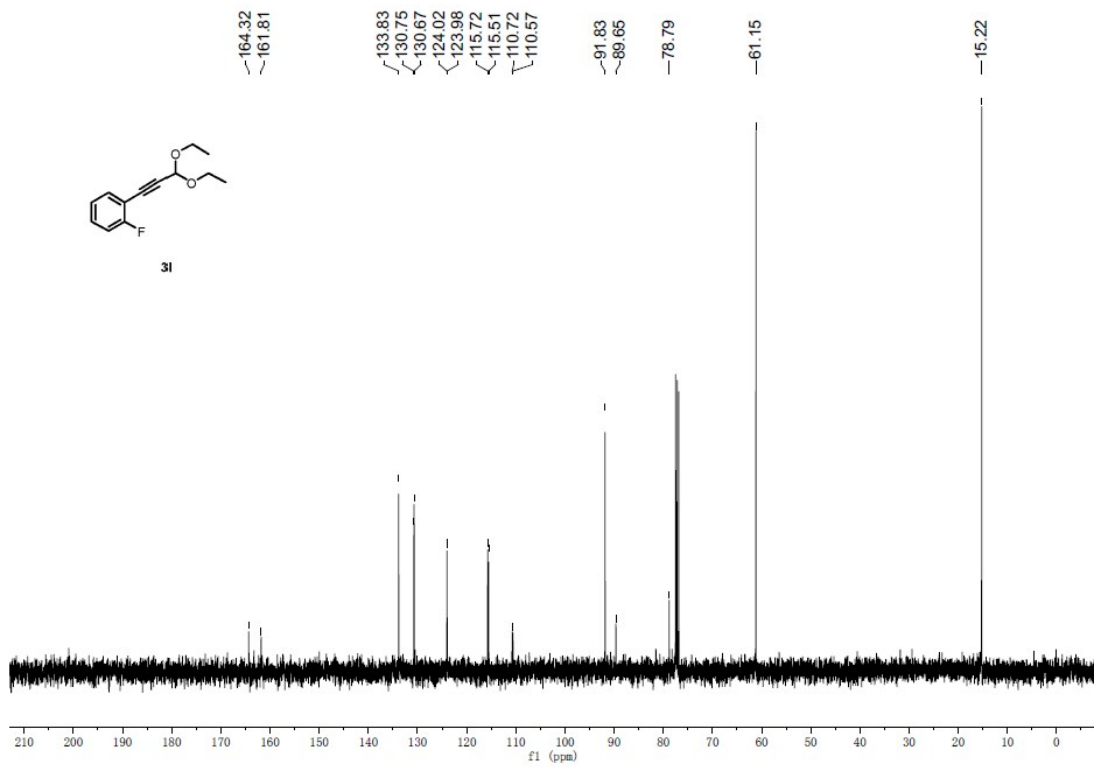

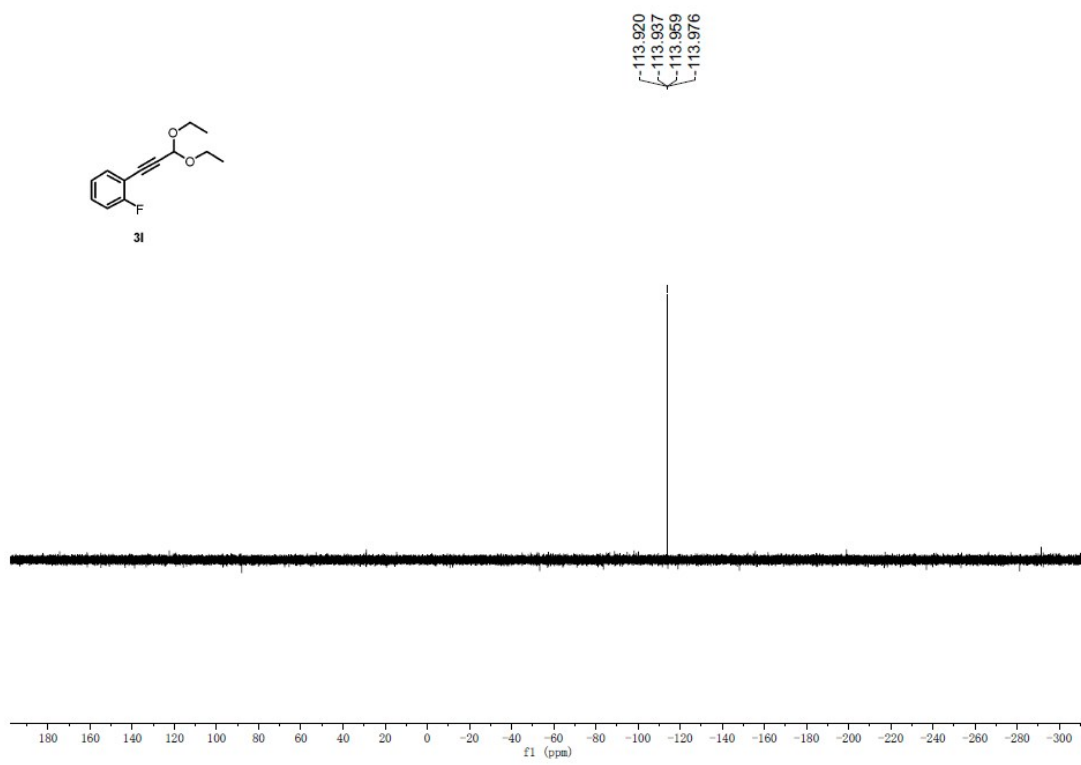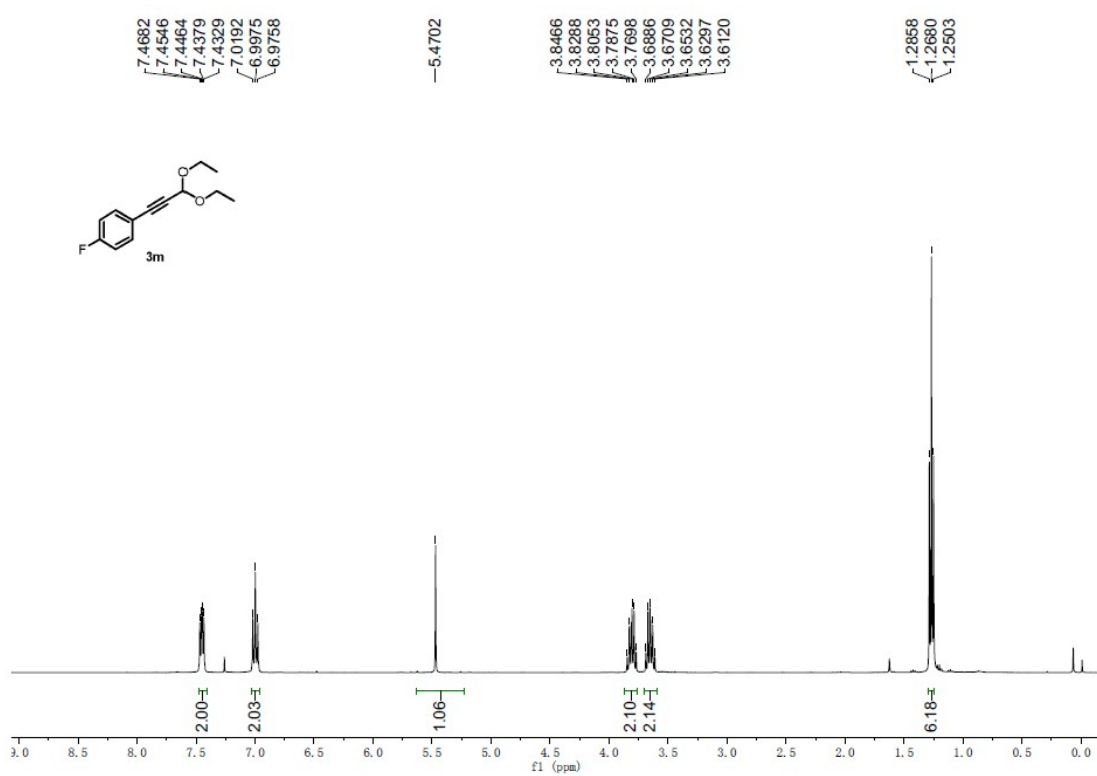

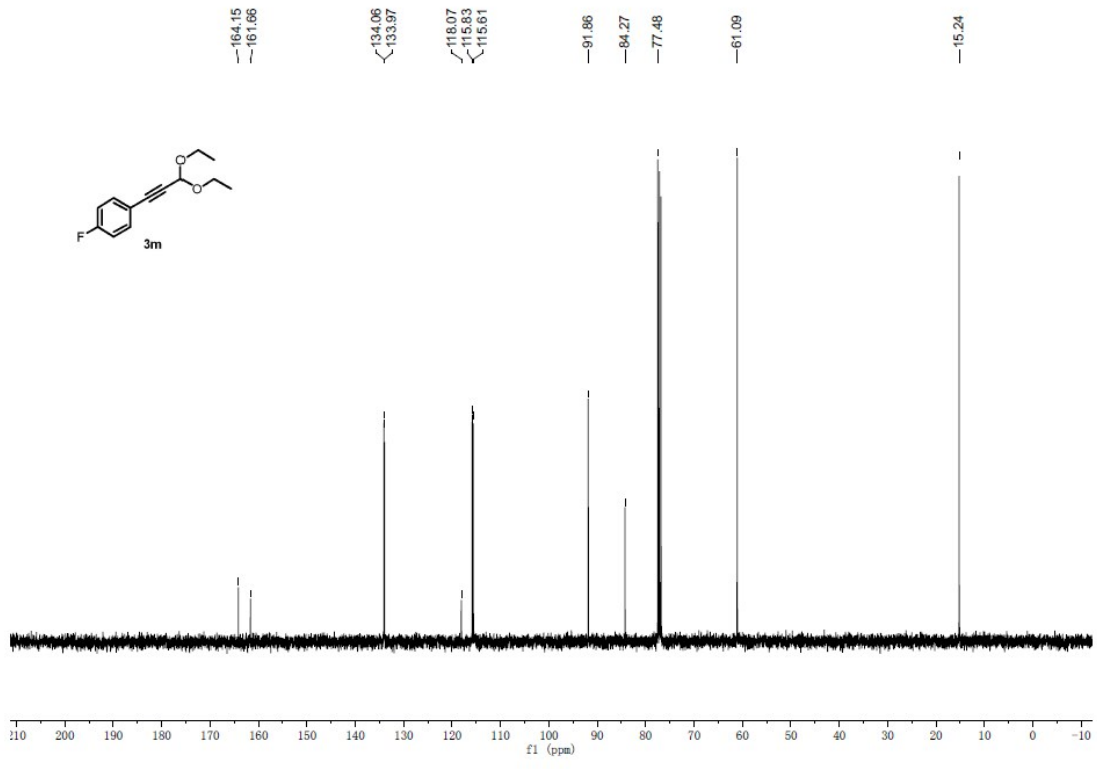

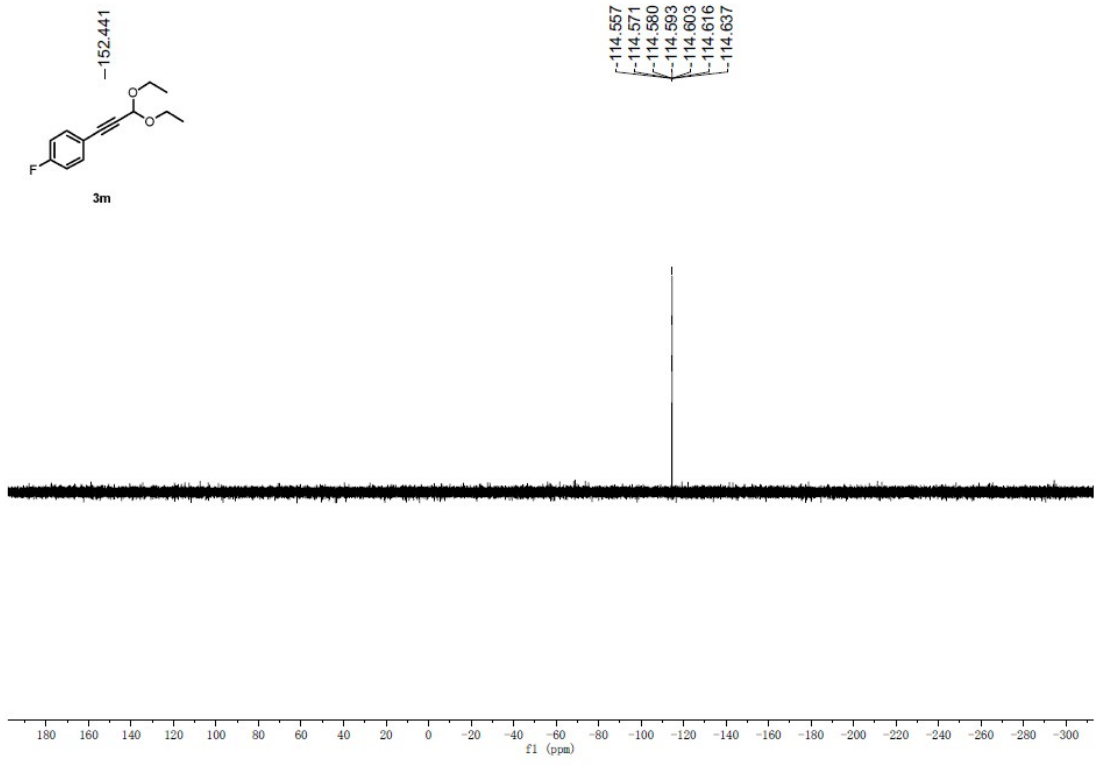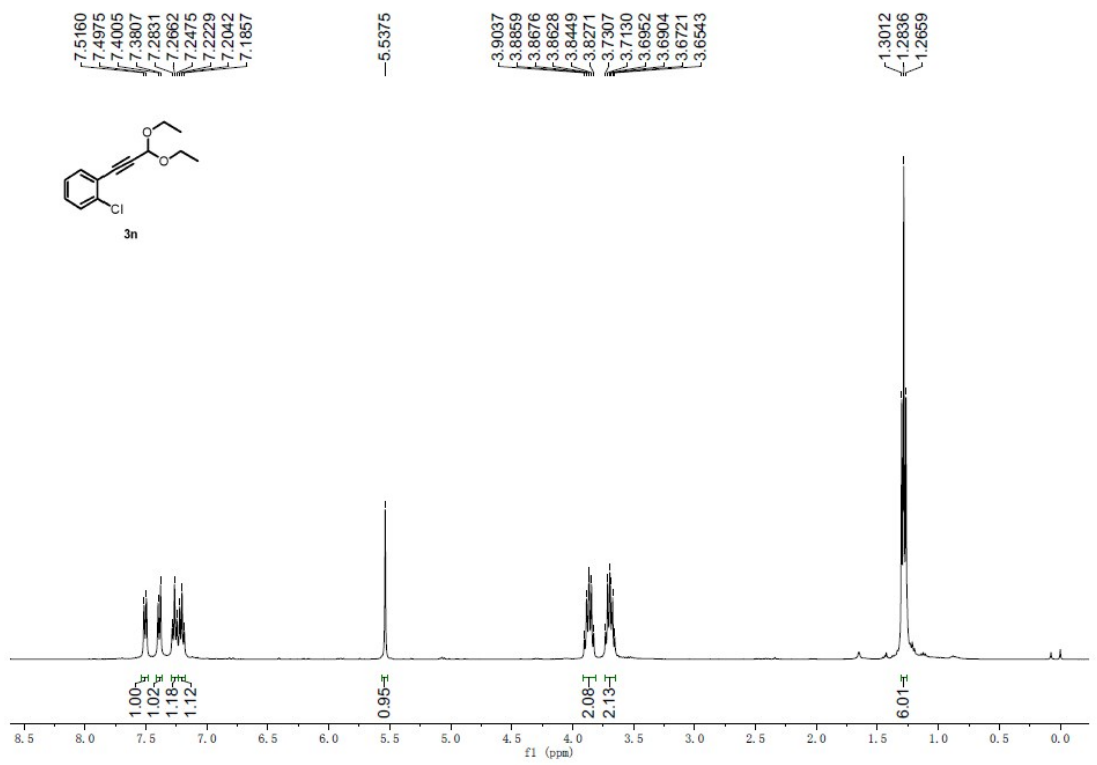

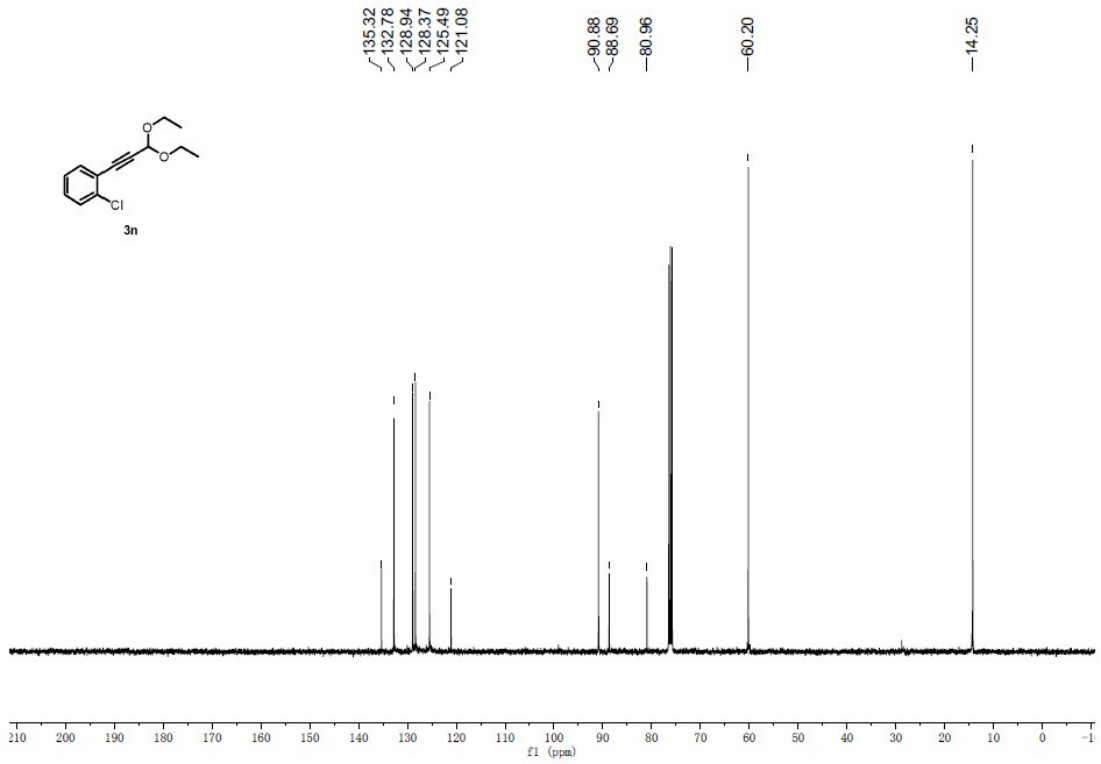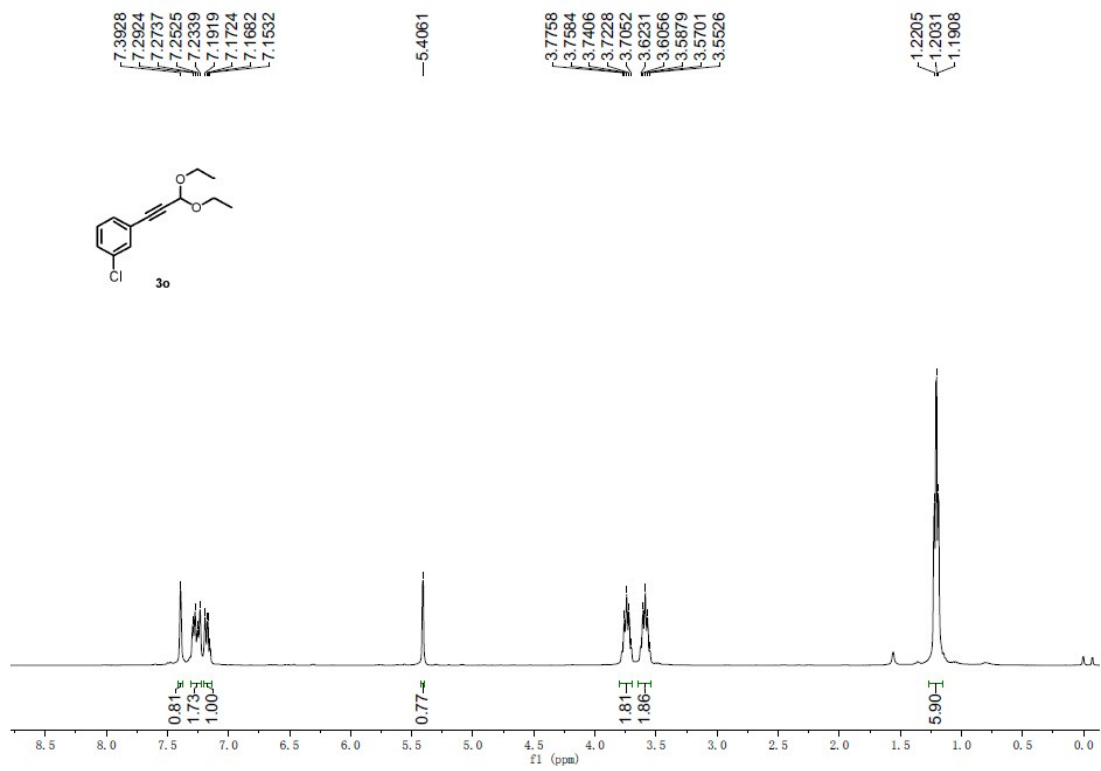



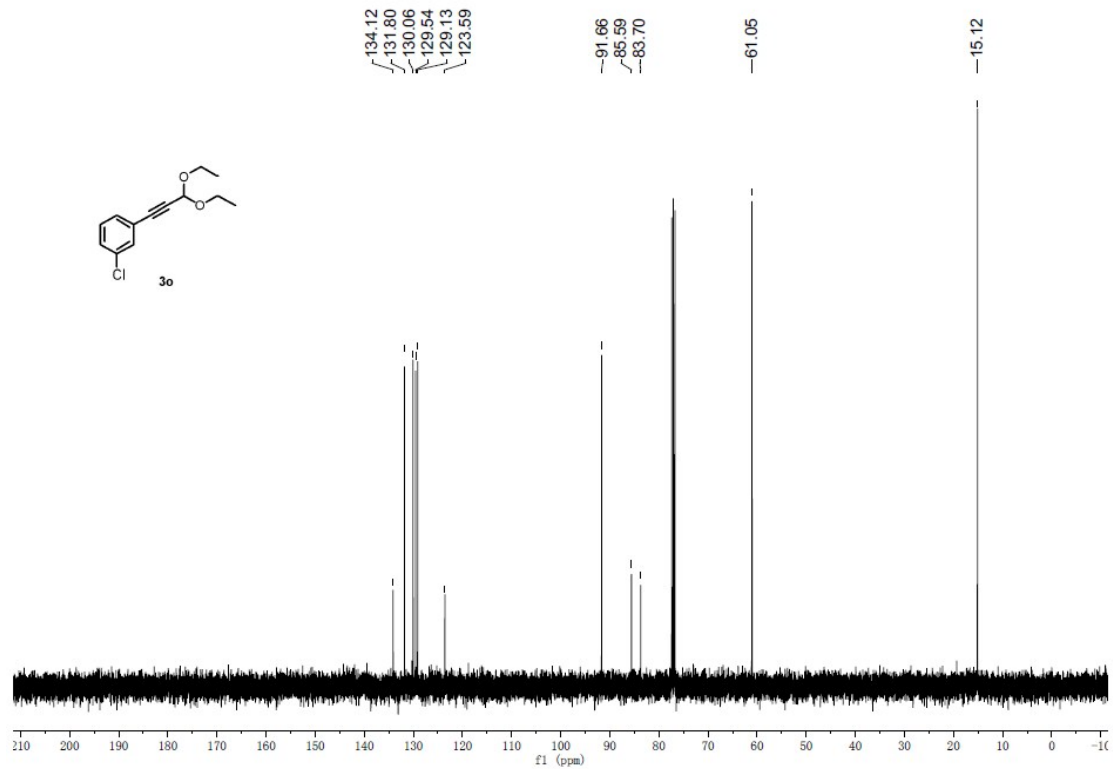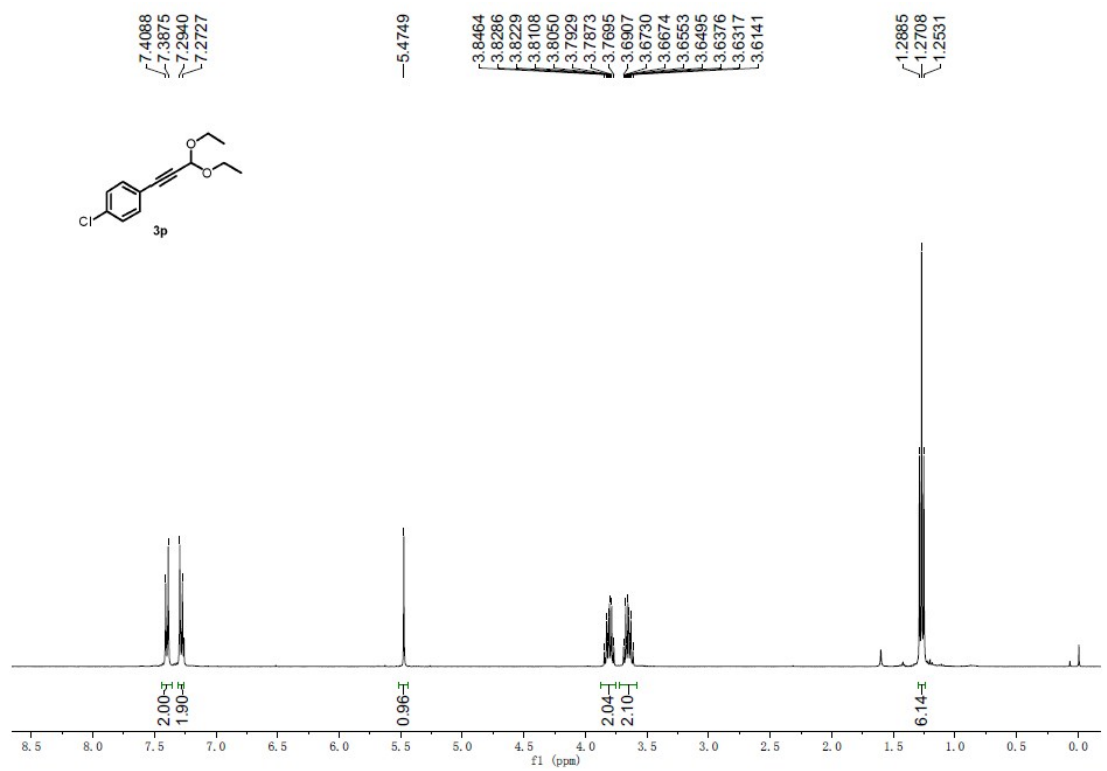

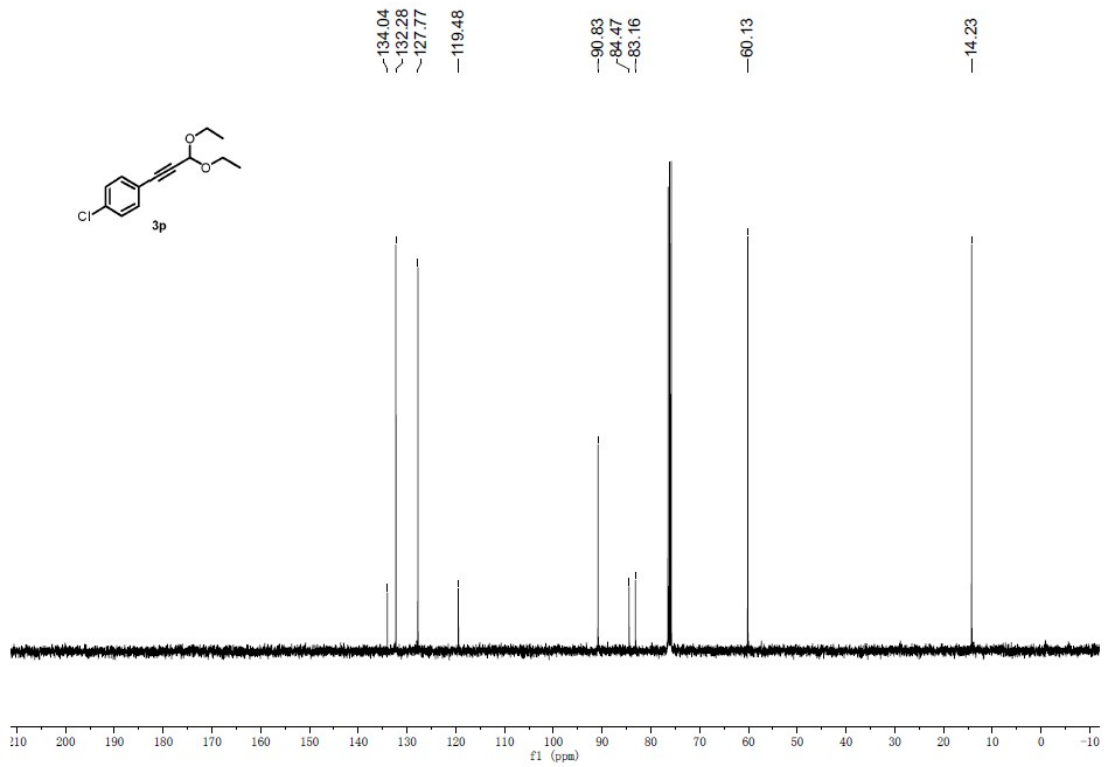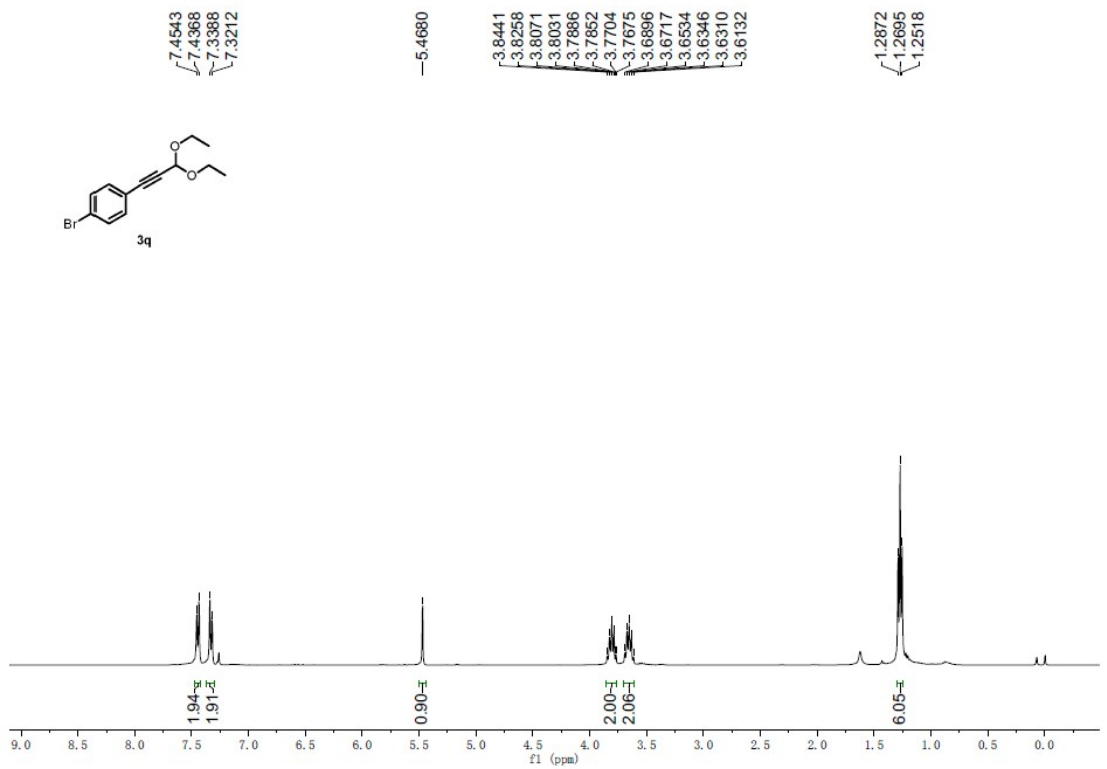

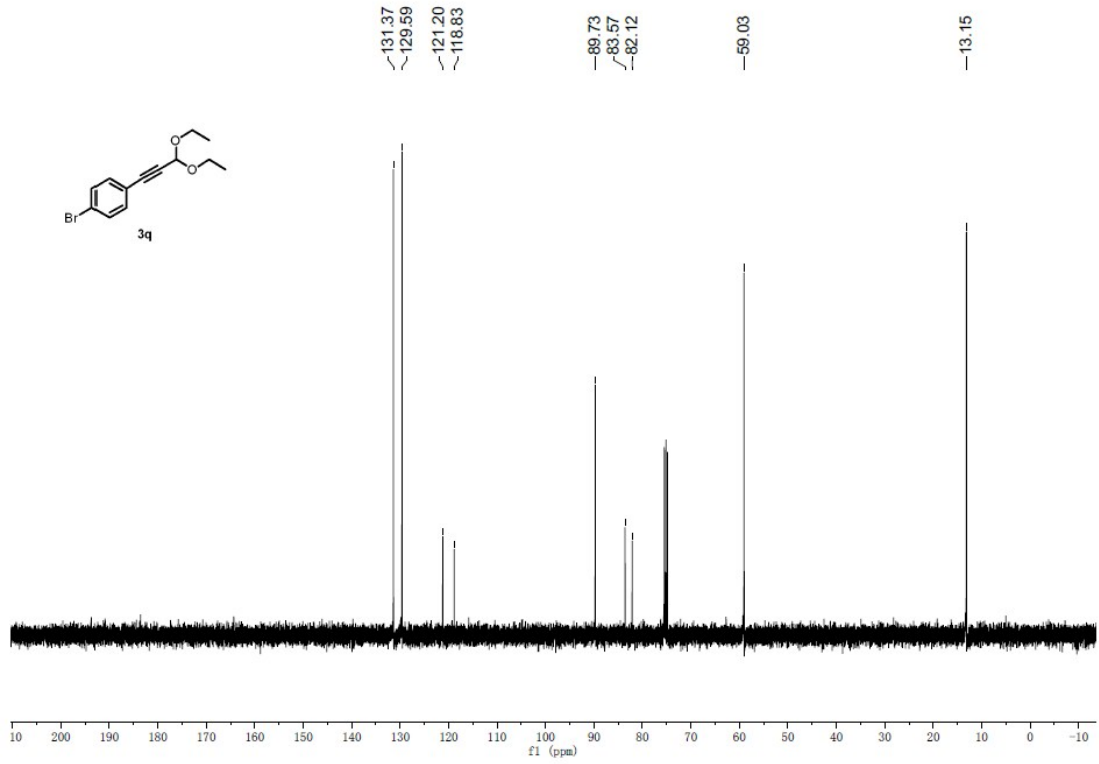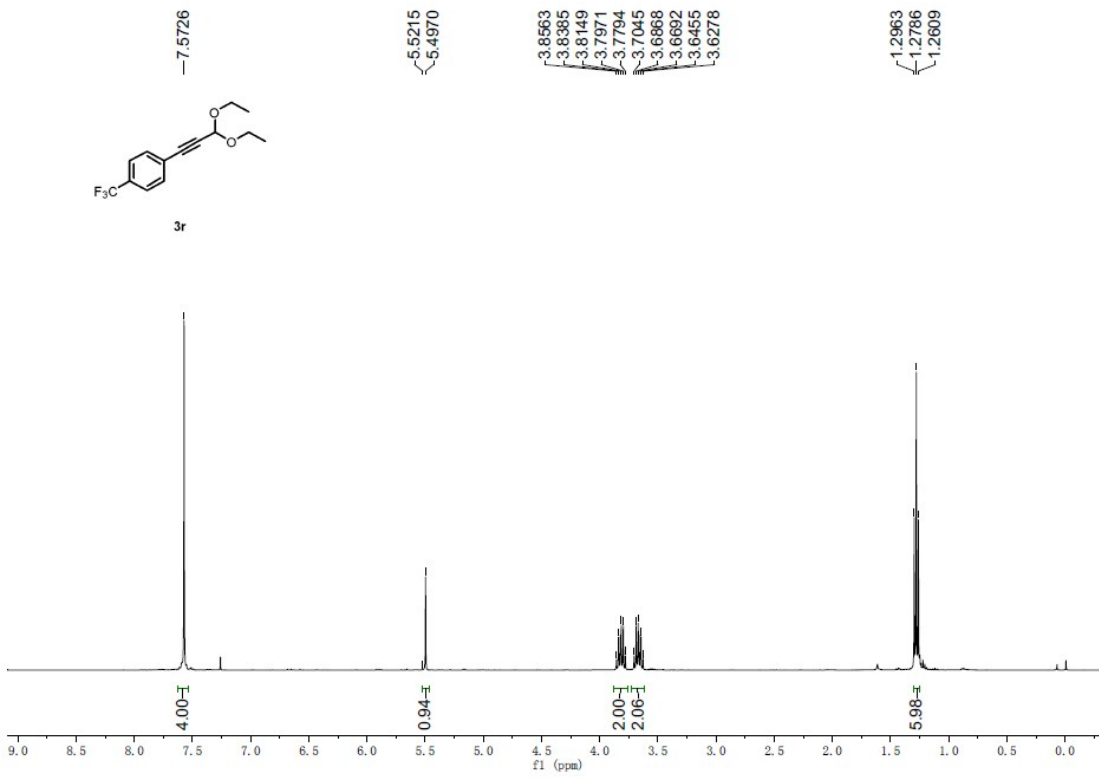

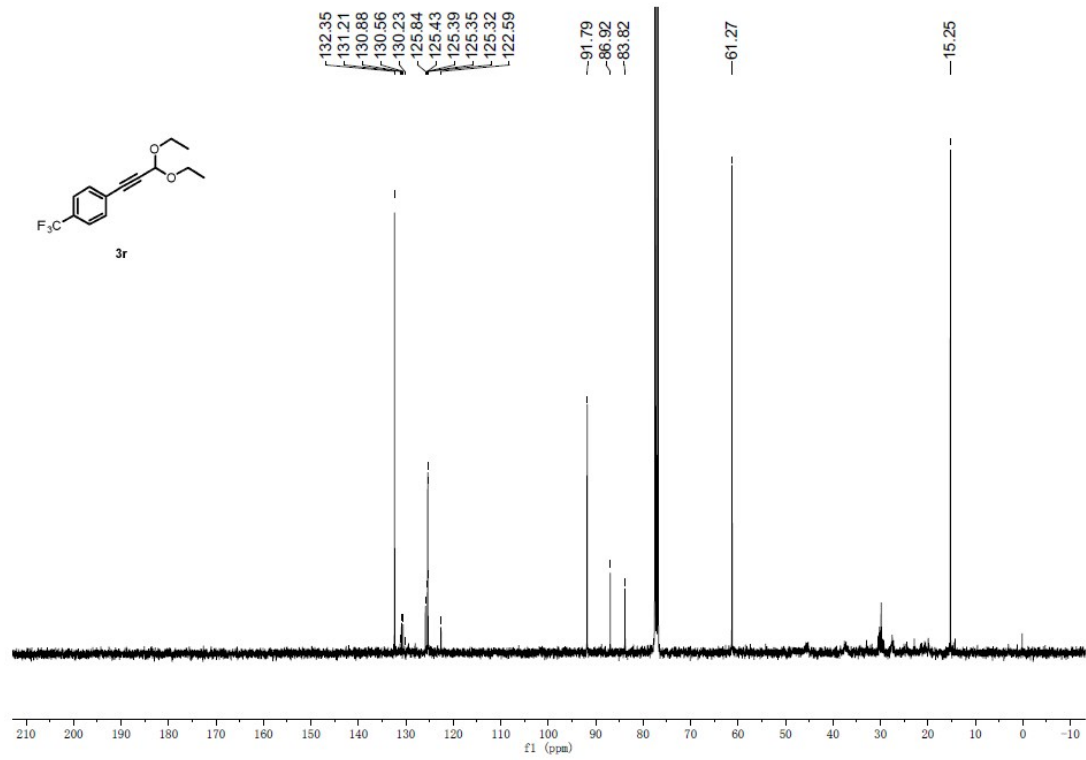

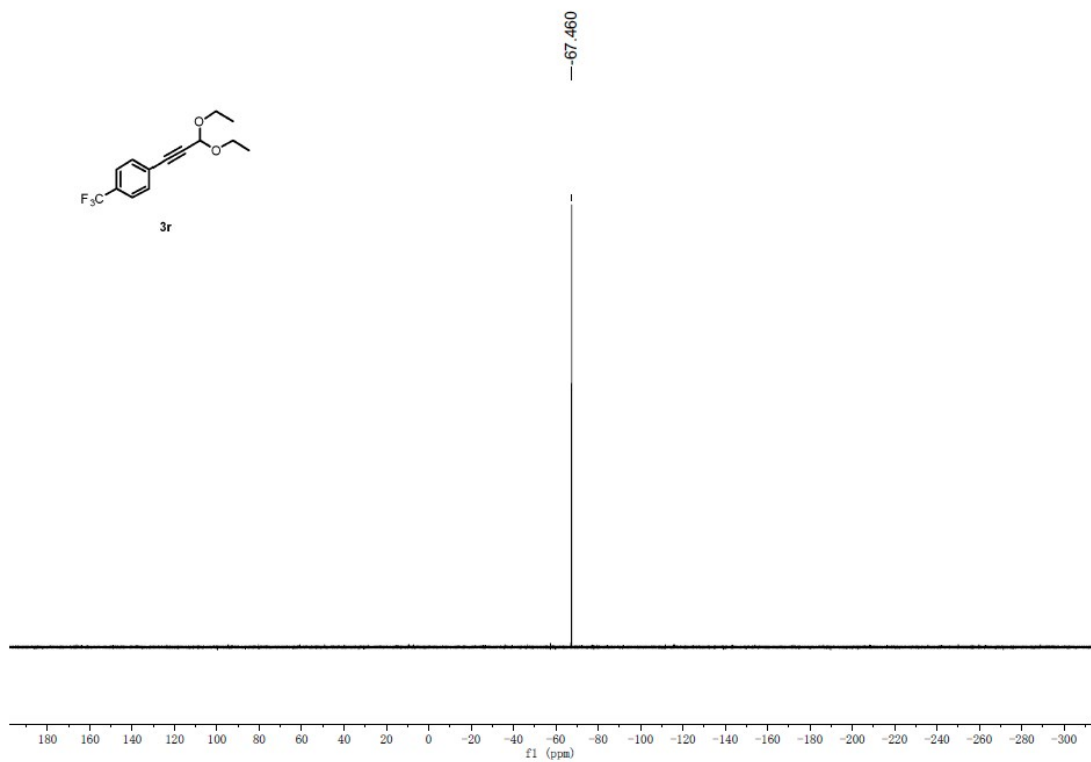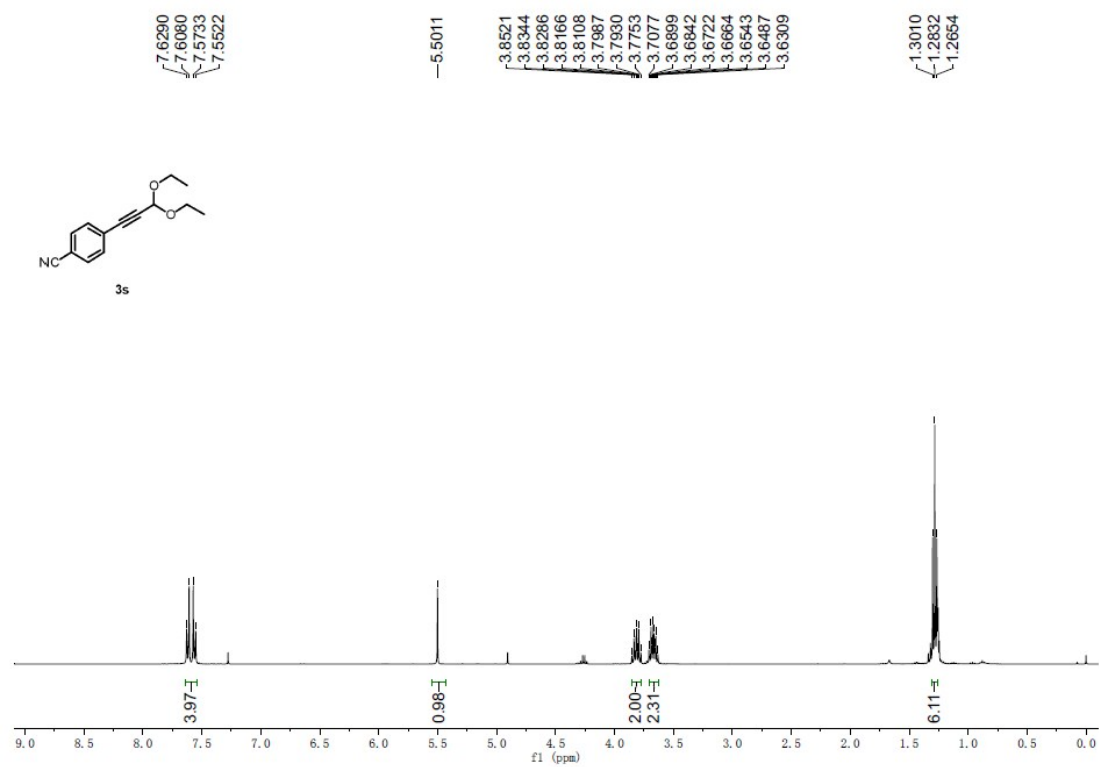

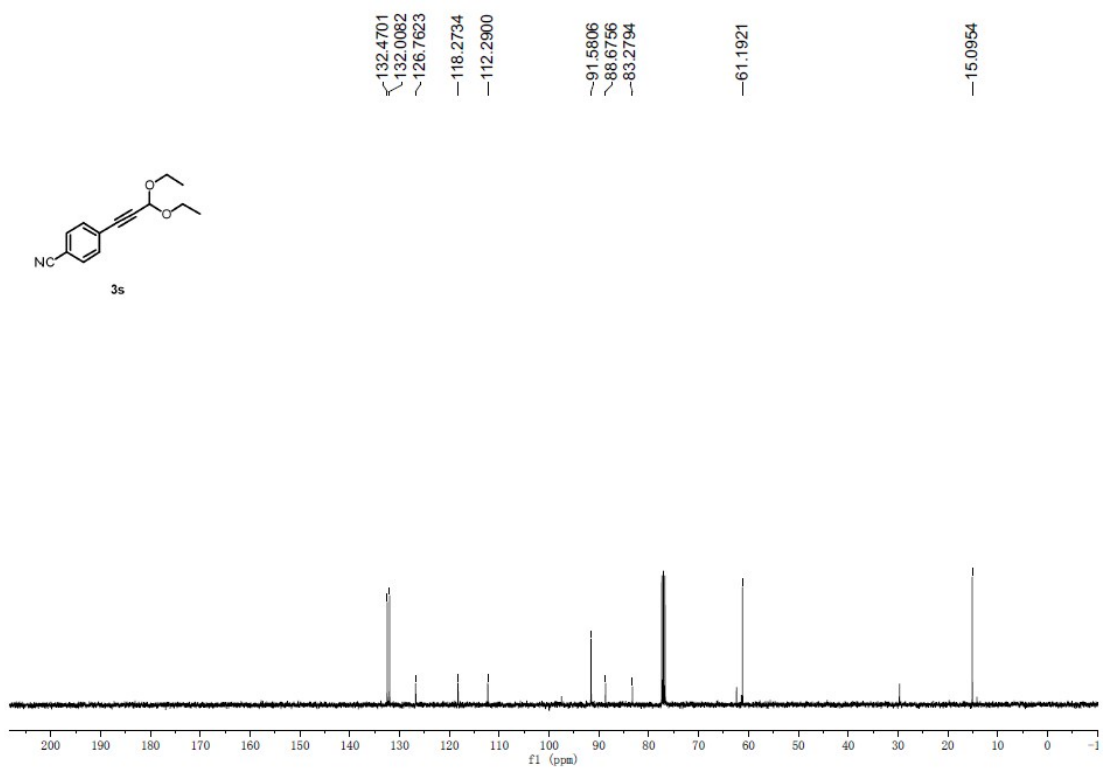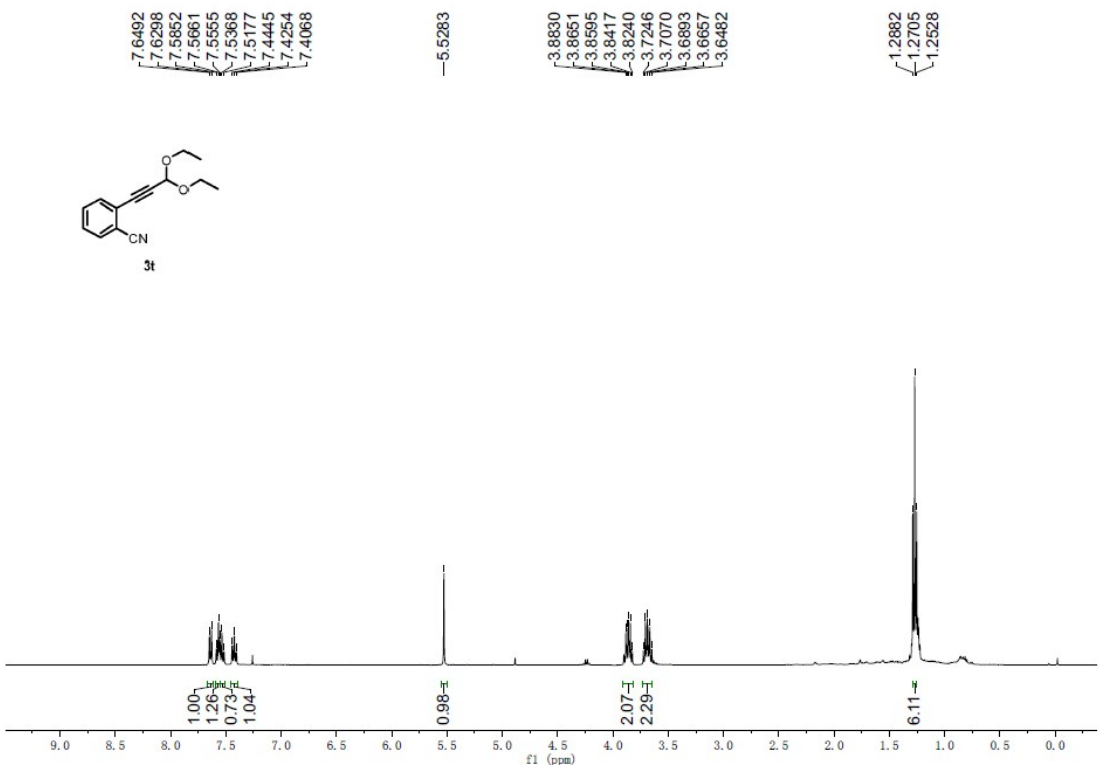

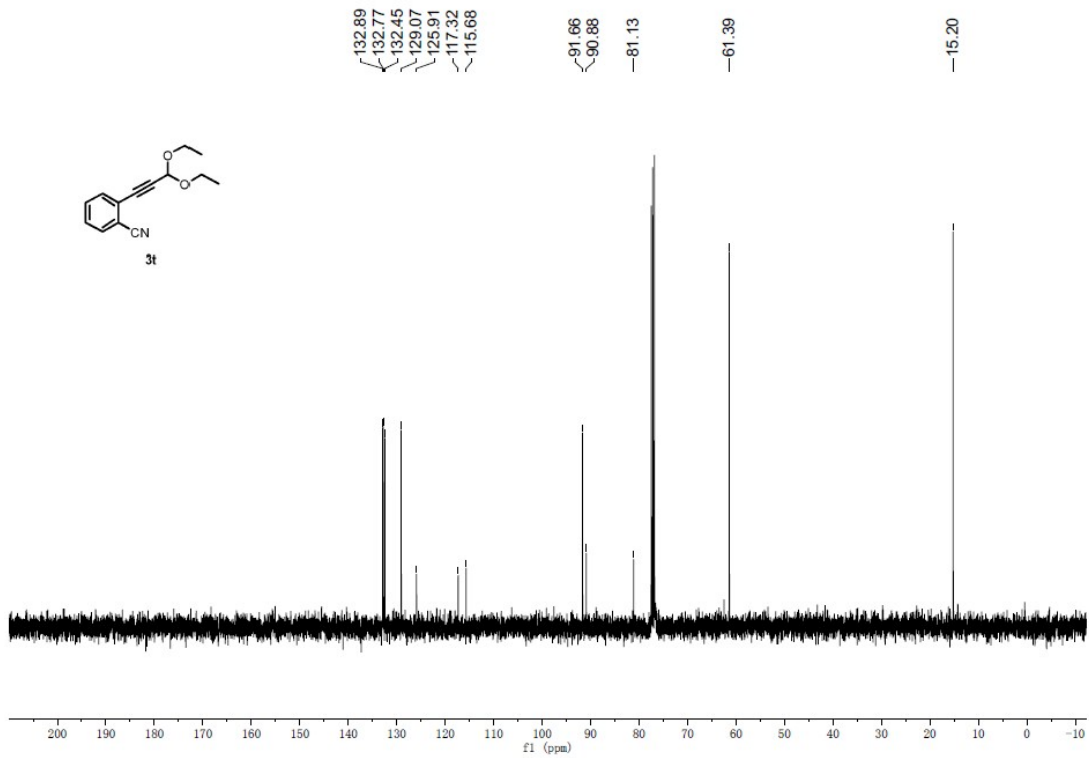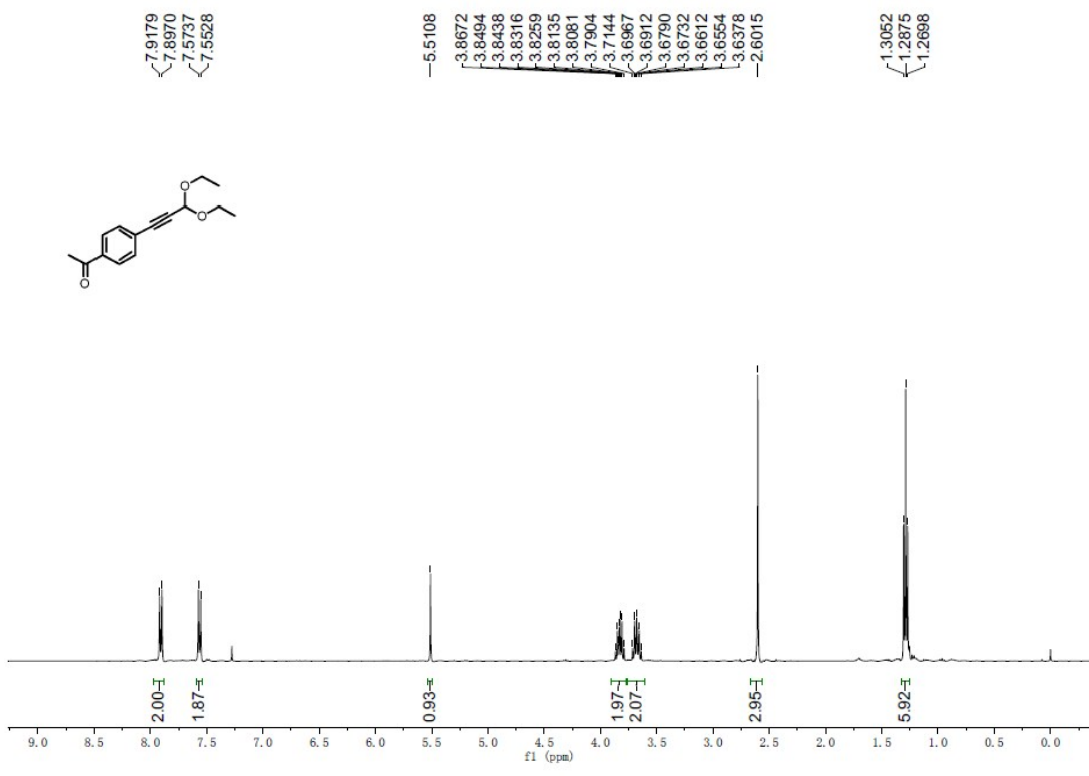

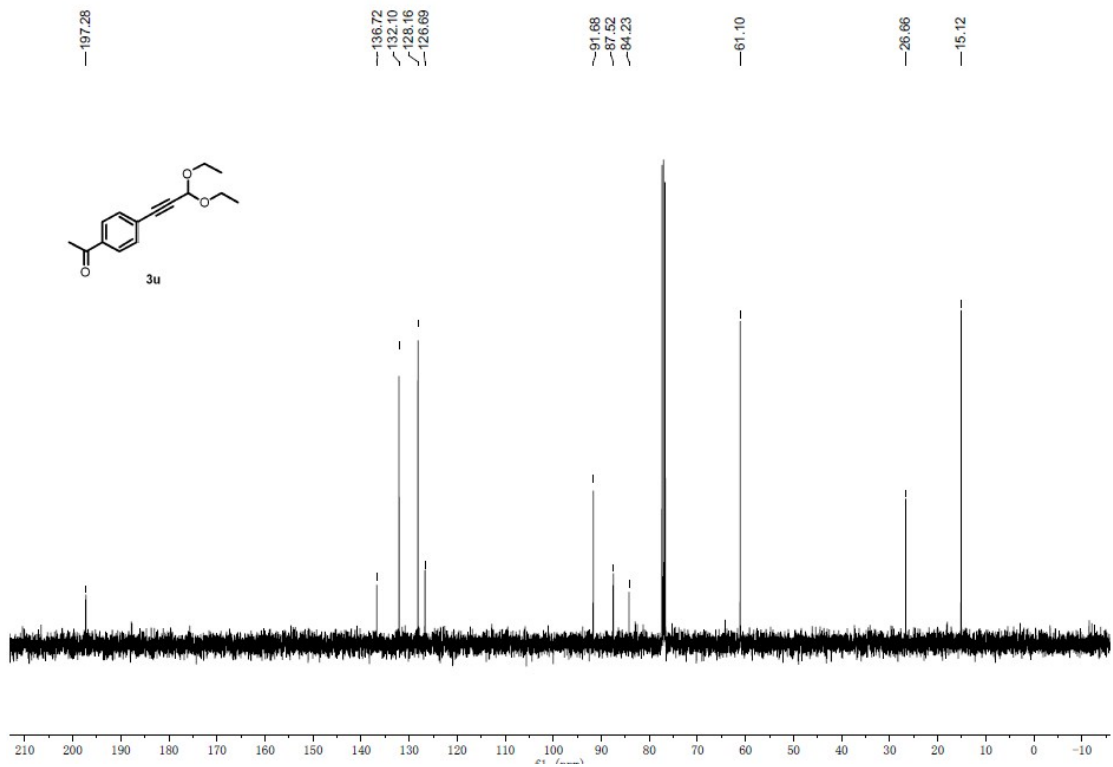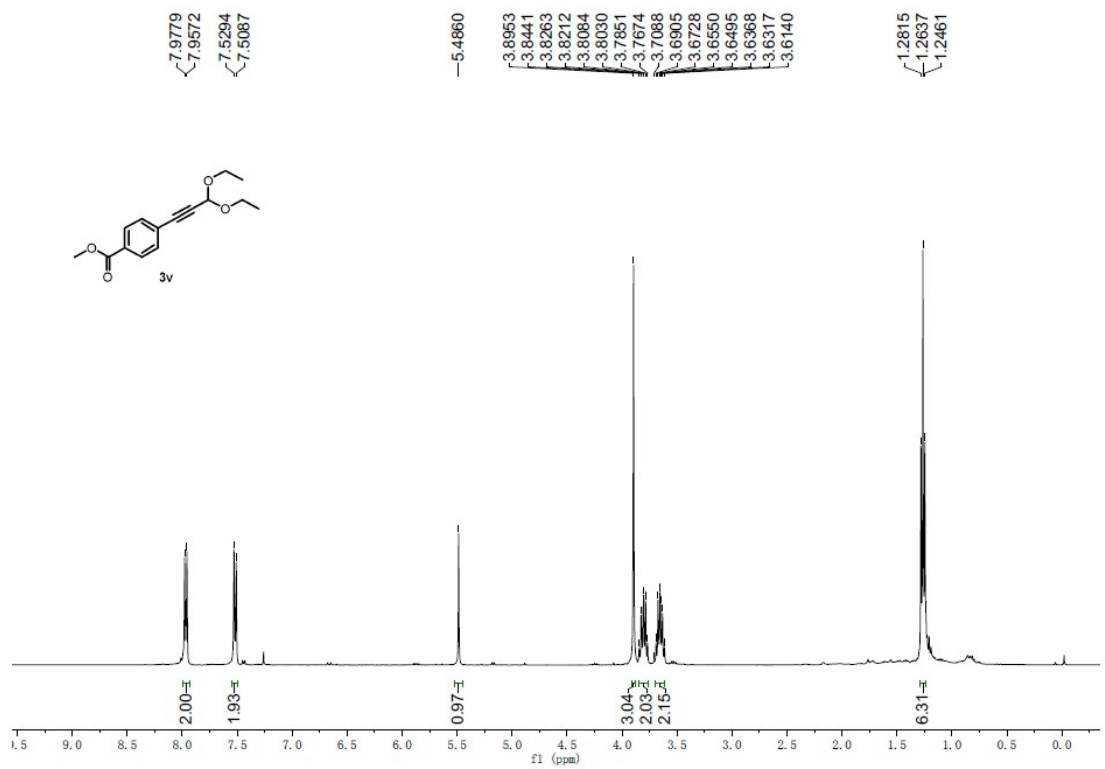



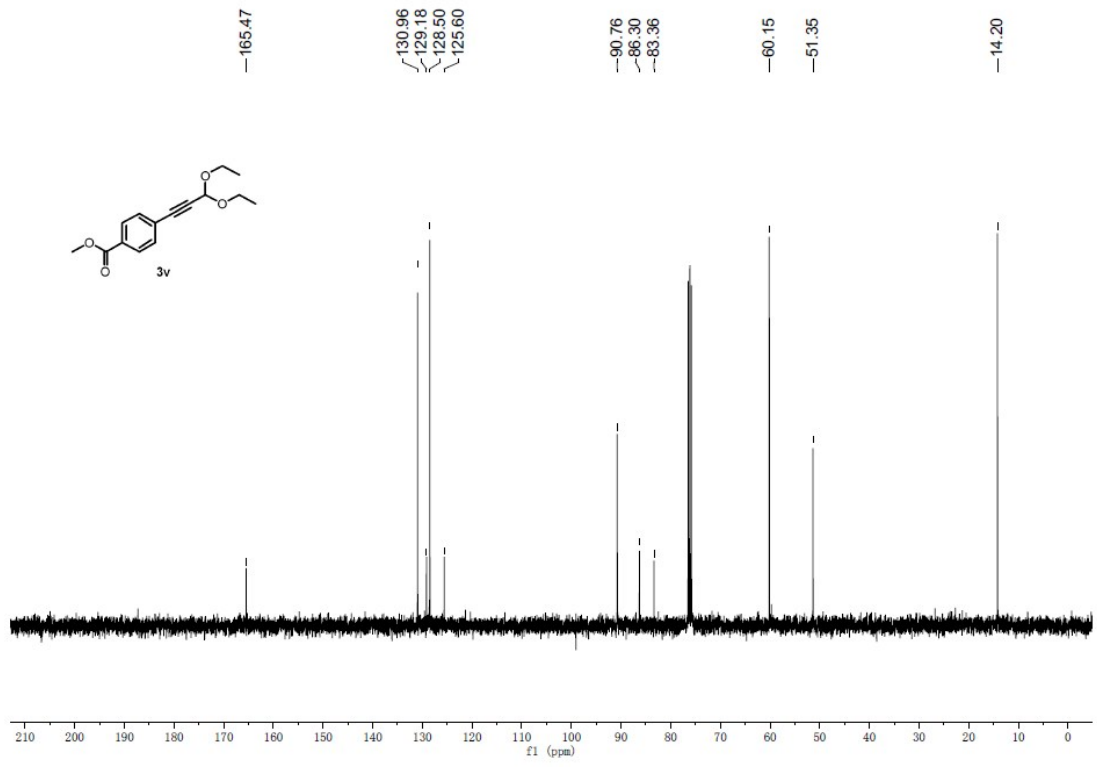

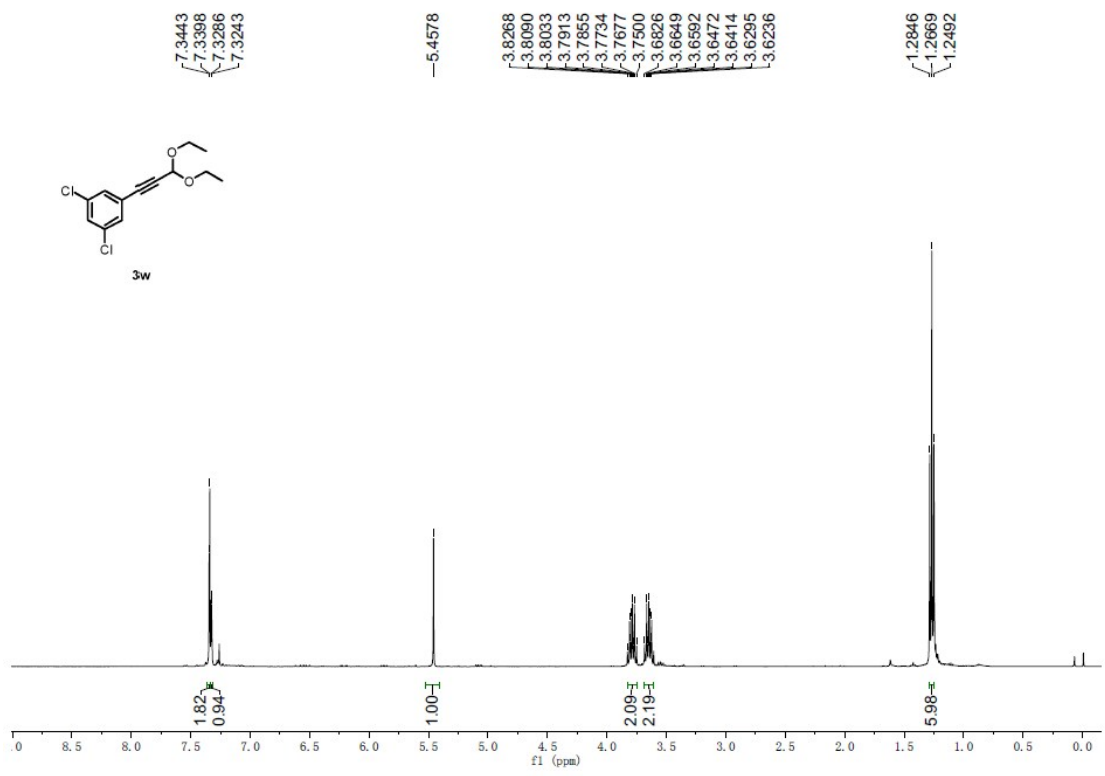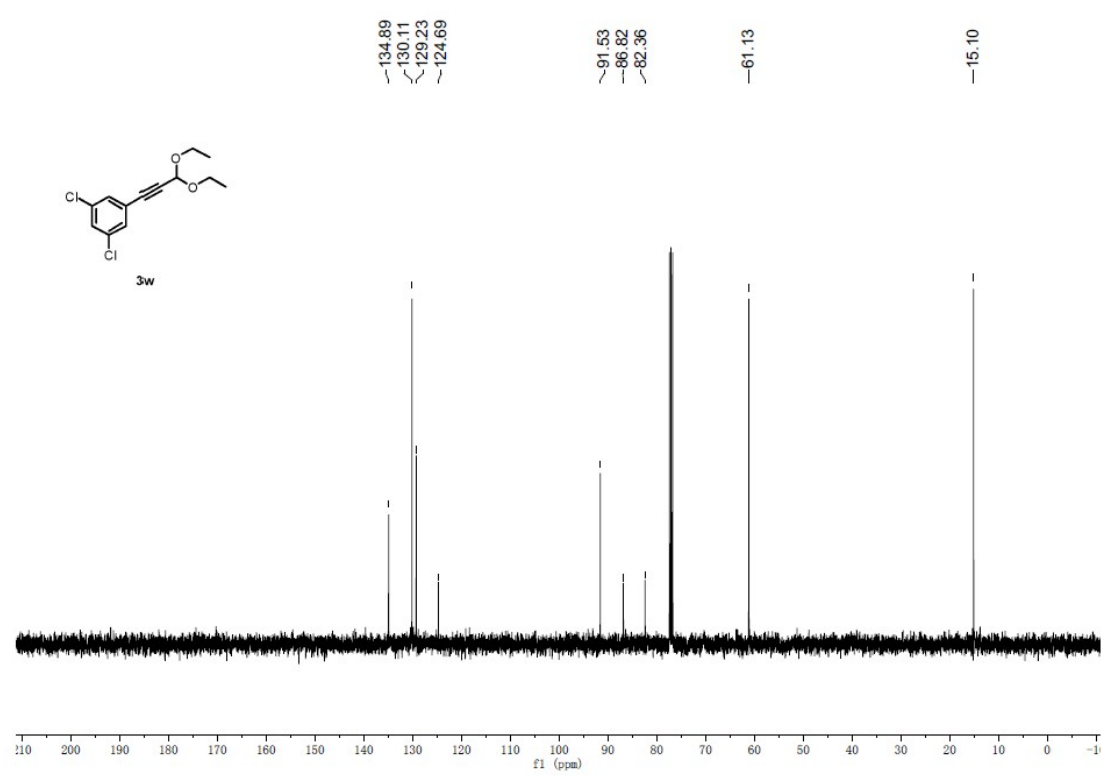

7.5253  
7.5228  
7.5179  
7.5155  
7.2801  
7.2771  
7.2728  
7.2677  
7.1594  
7.1569  
7.1469  
7.1444

3.8648  
3.8470  
3.8412  
3.8293  
3.8234  
3.8114  
3.8057  
3.7879  
3.7053  
3.6876  
3.6818  
3.6700  
3.6640  
3.6523  
3.6463  
3.6287

1.3039  
1.2862  
1.2685

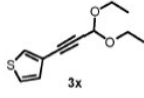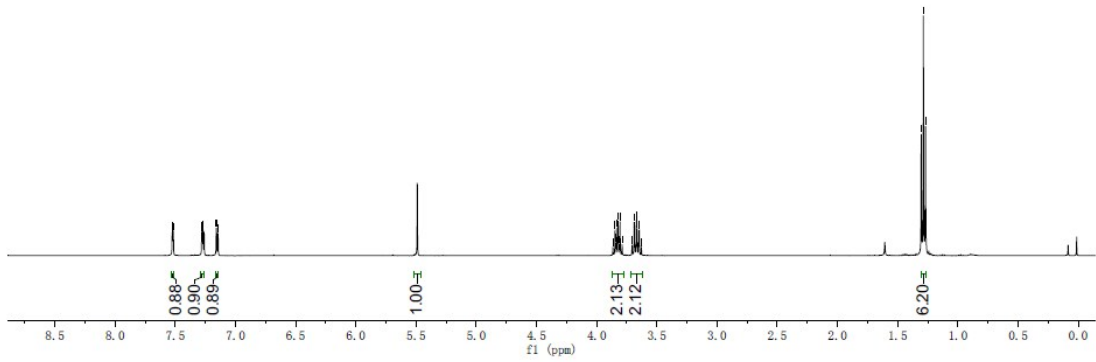

129.05  
128.94  
124.45  
120.01

90.92

83.13

79.60

60.06

14.24

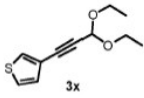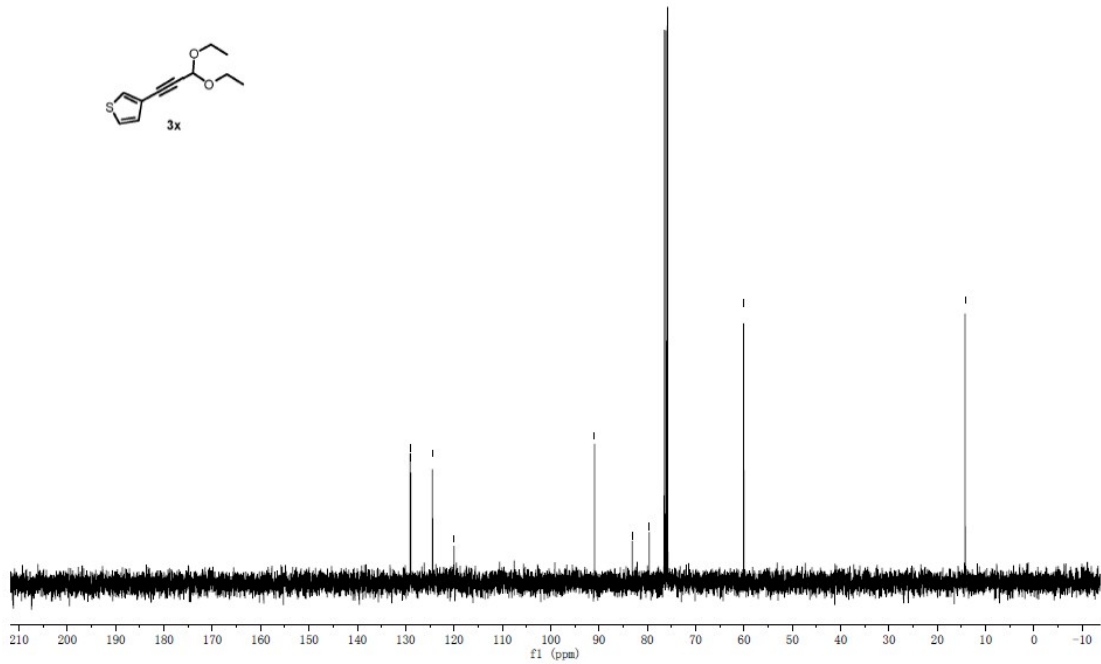

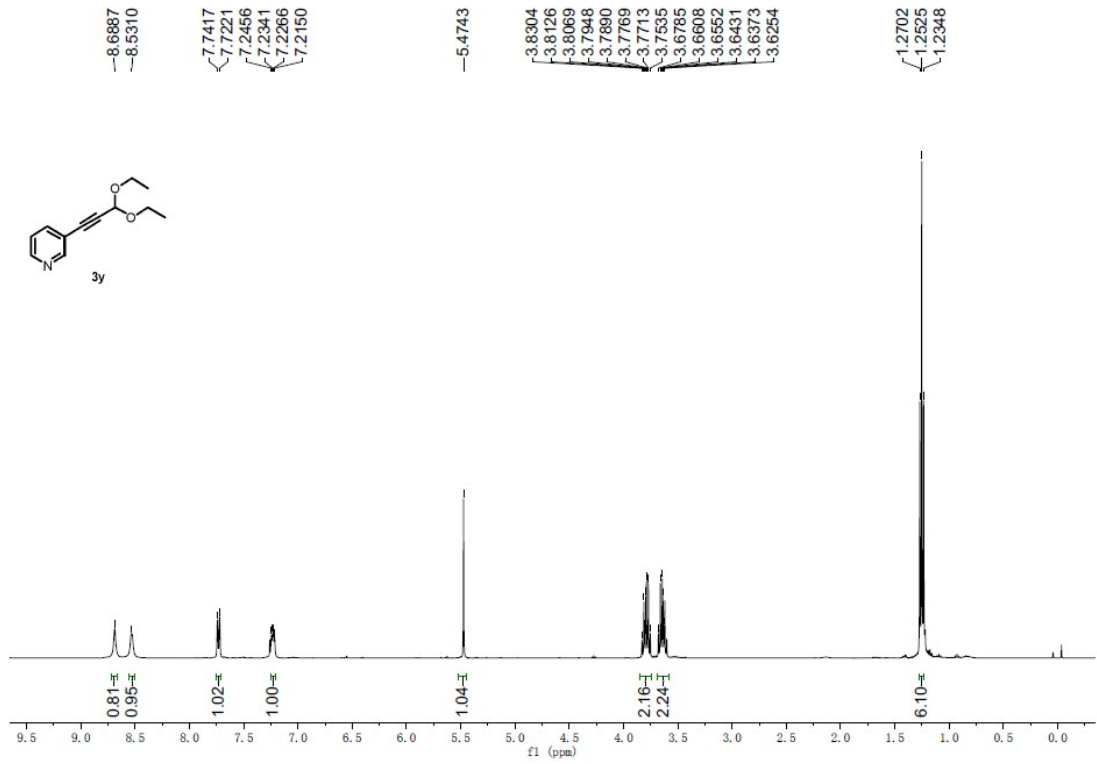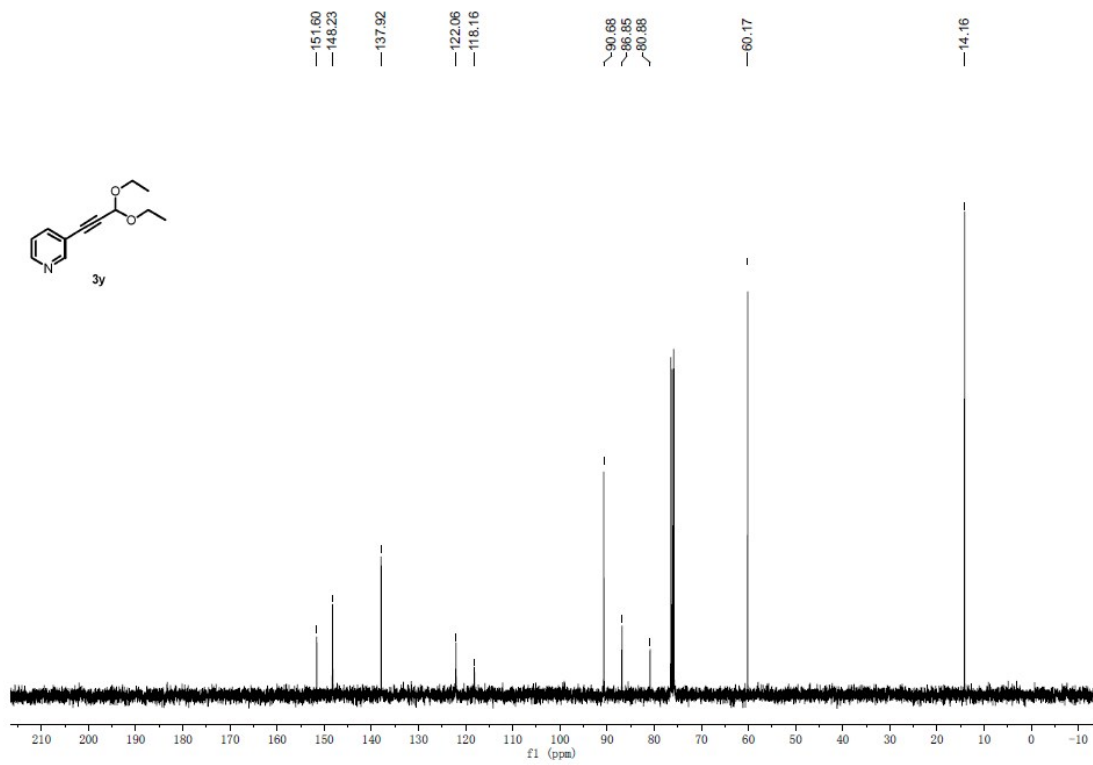

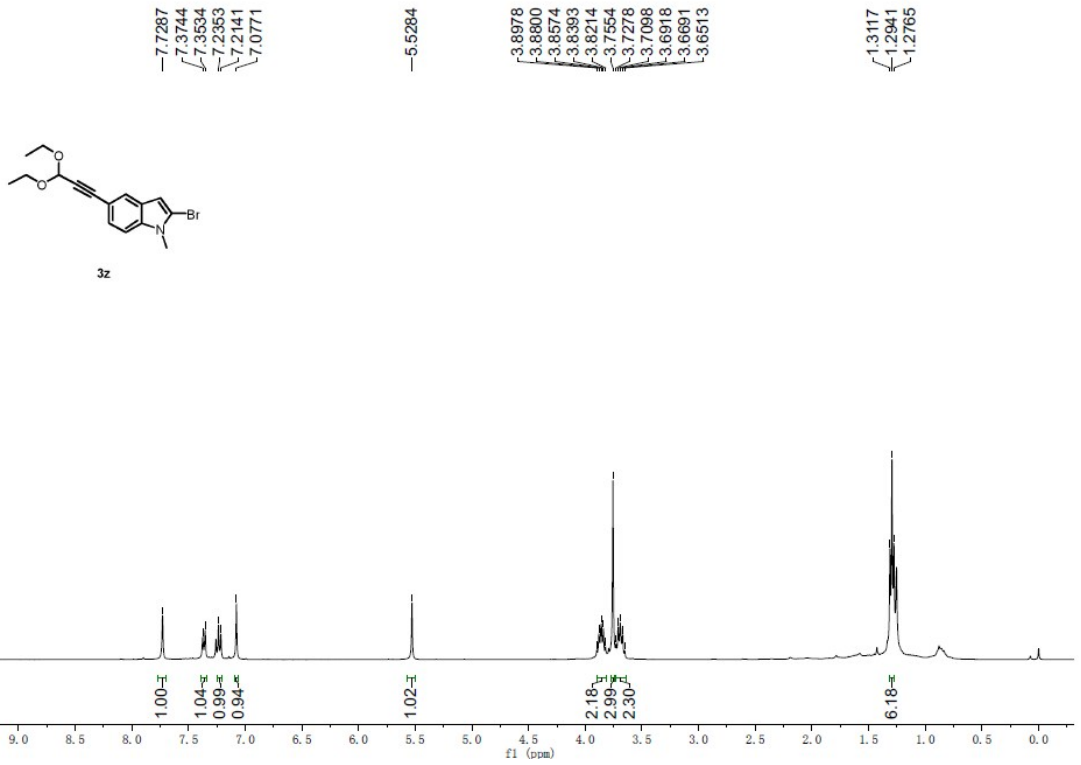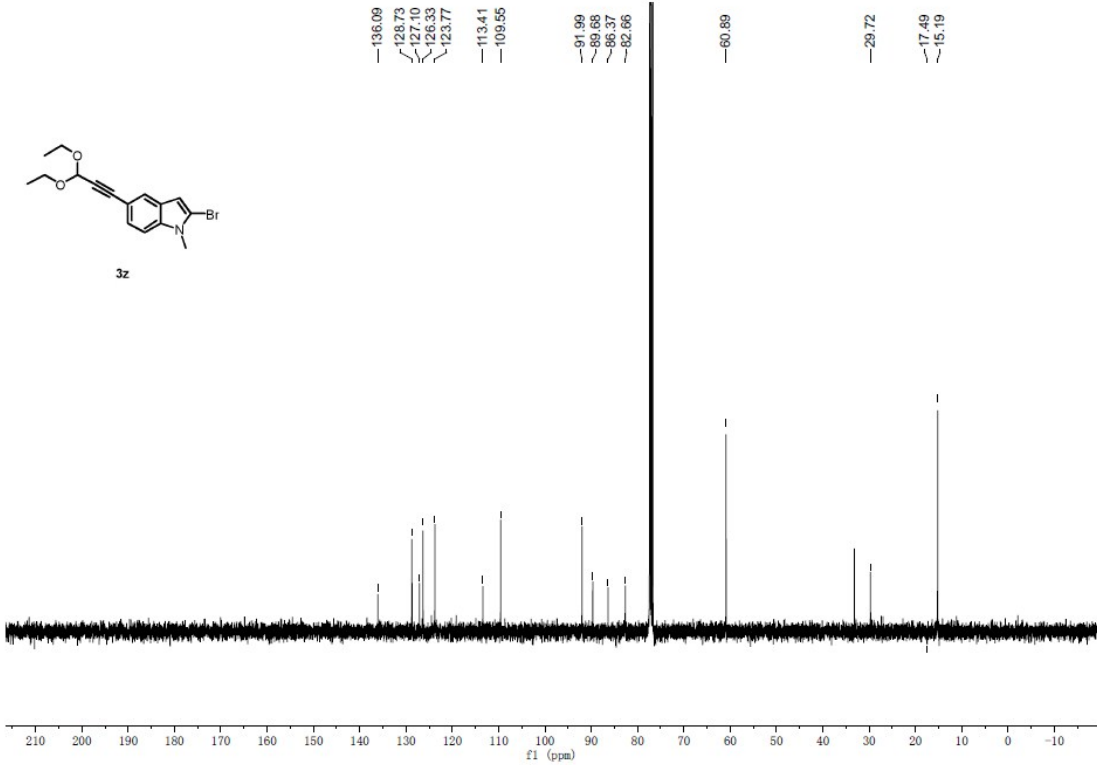

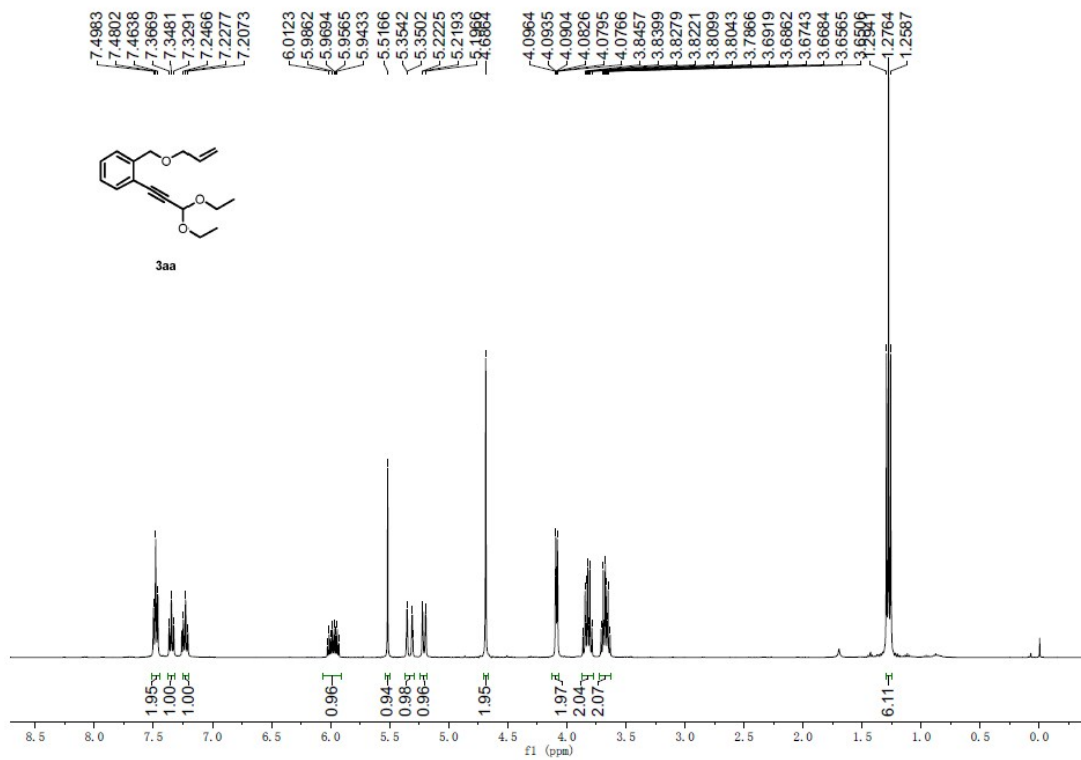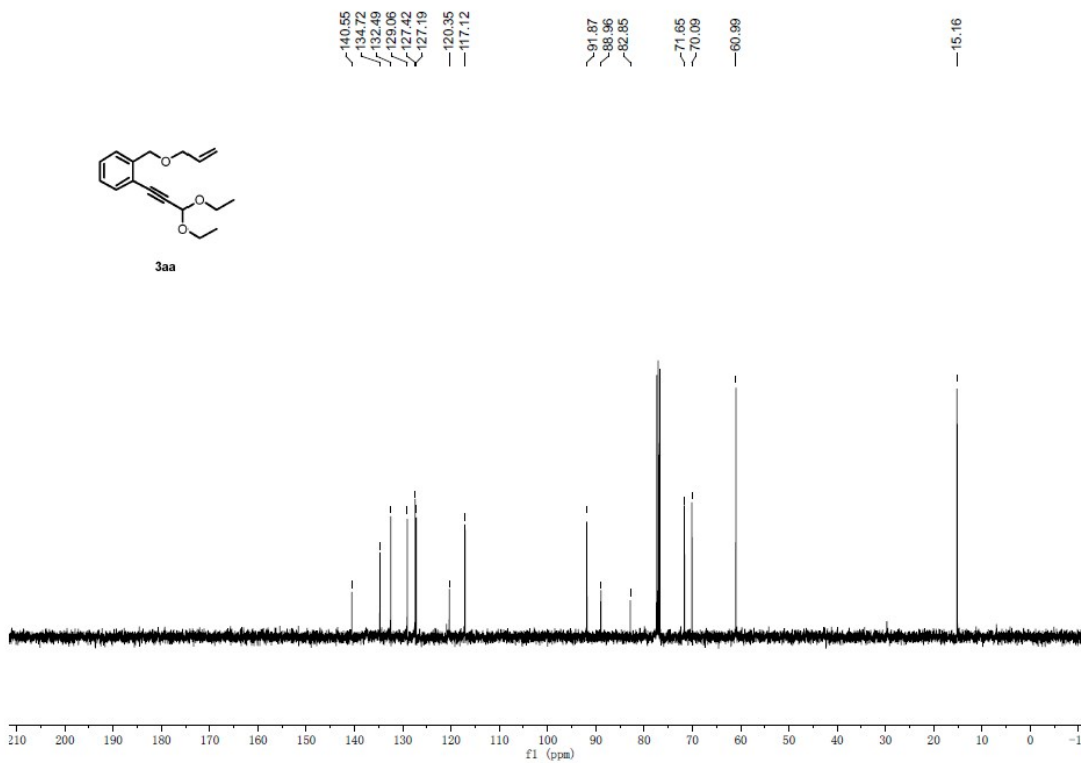

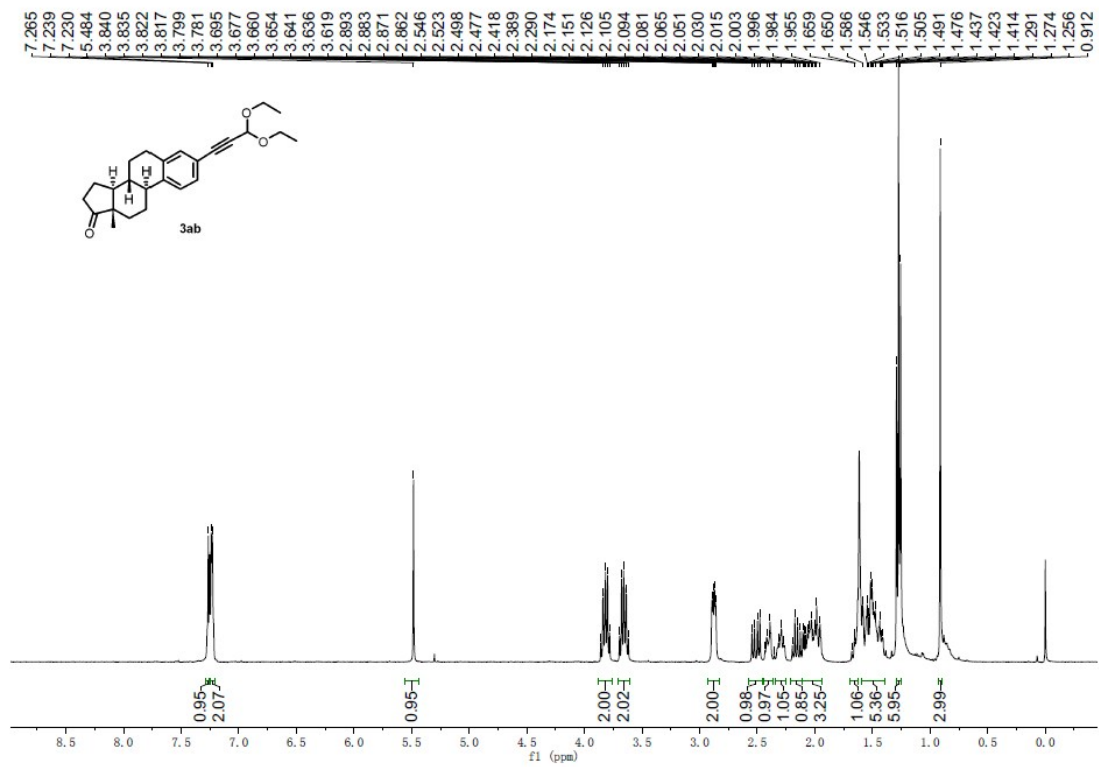

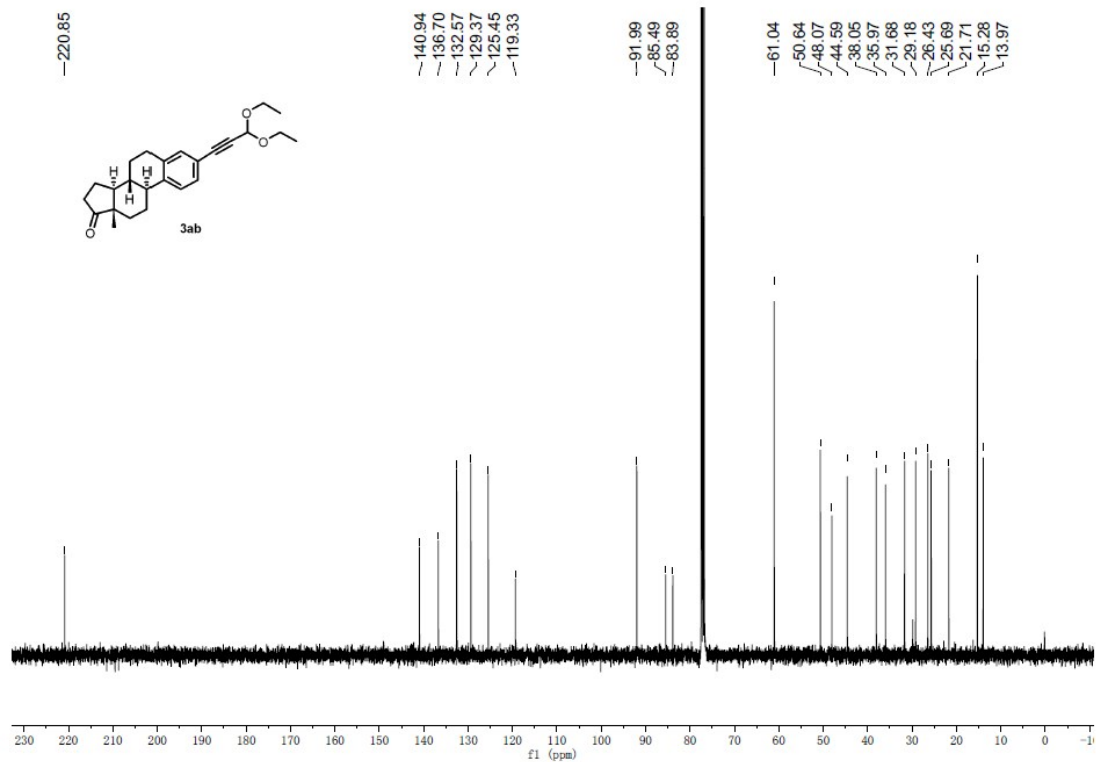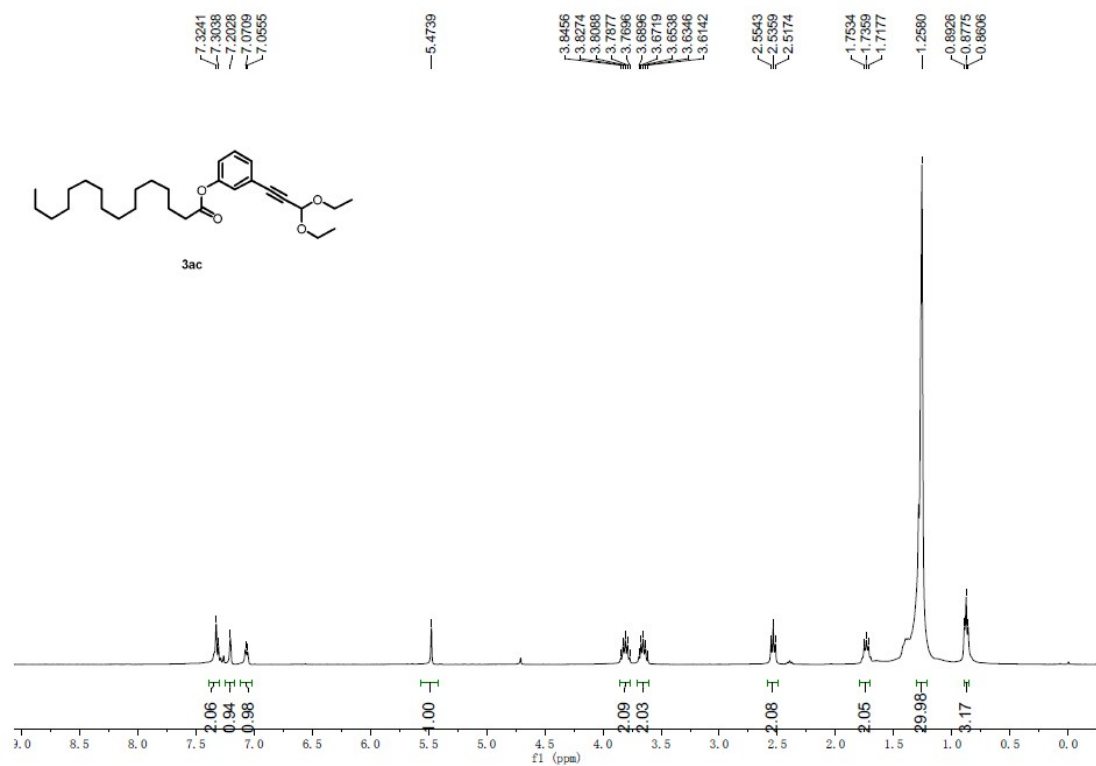



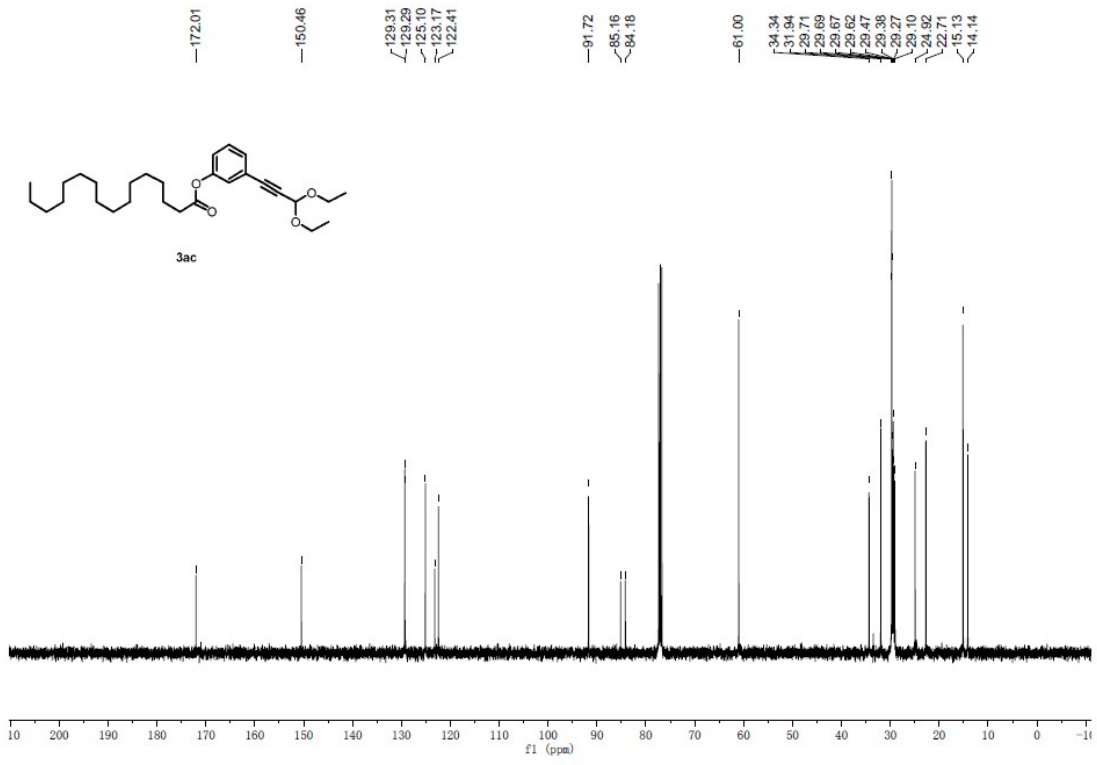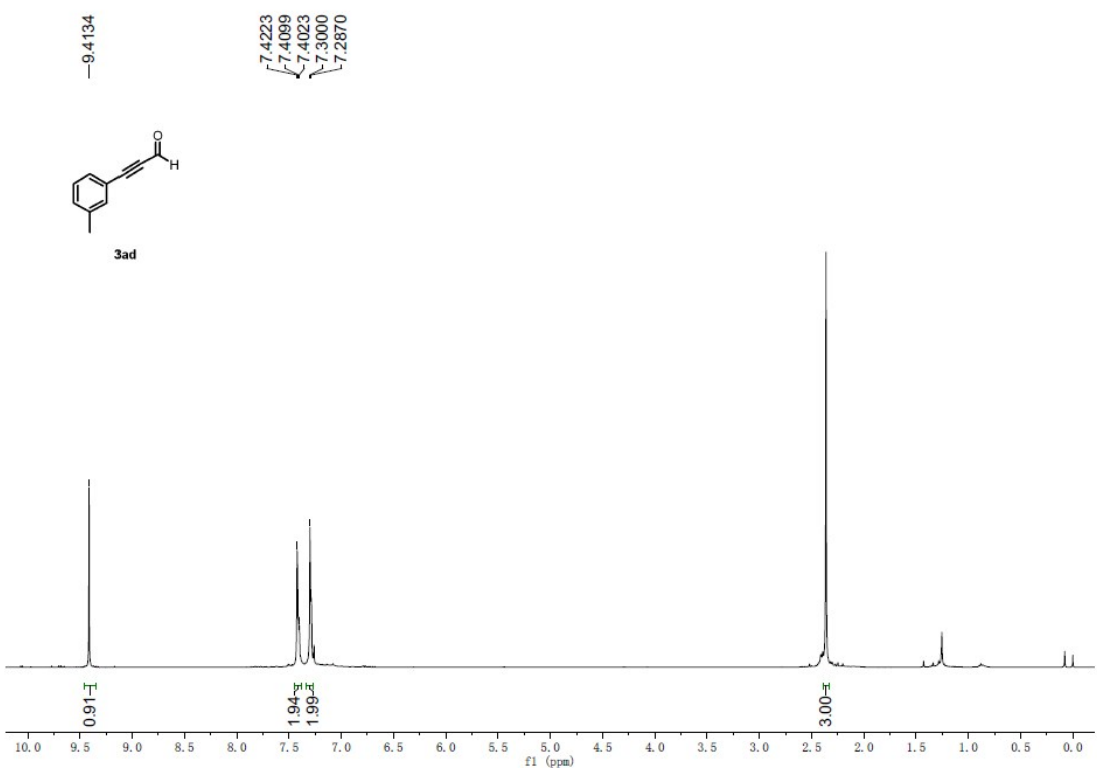

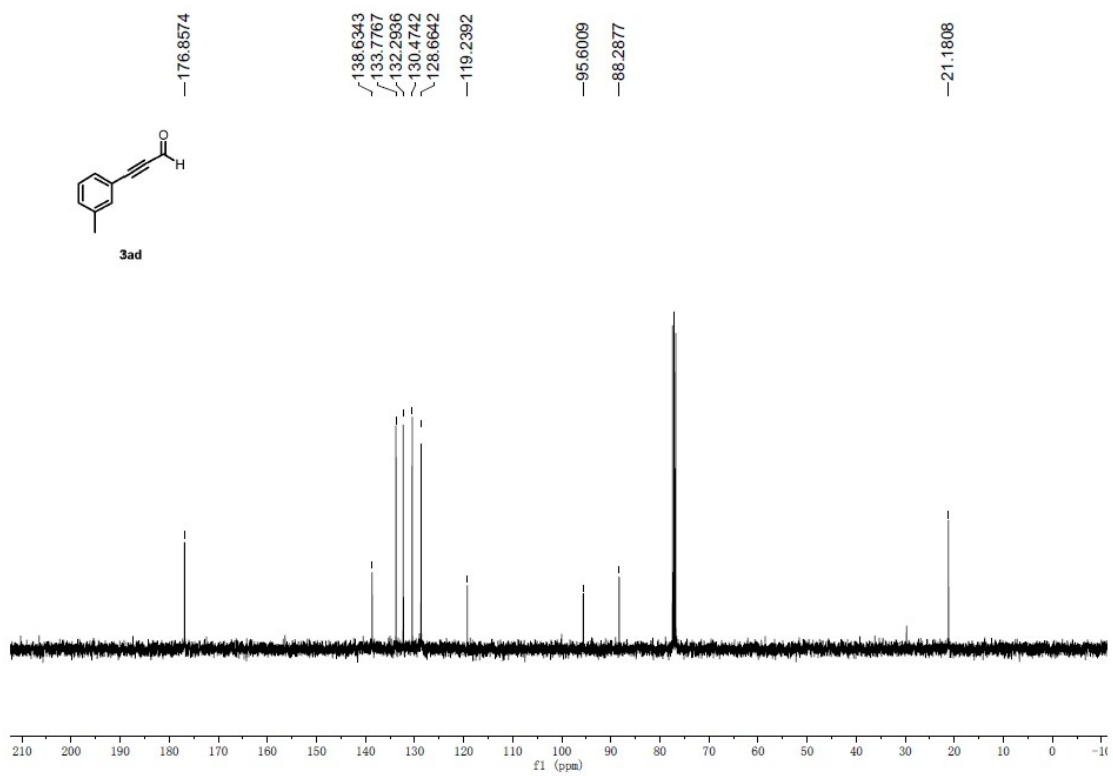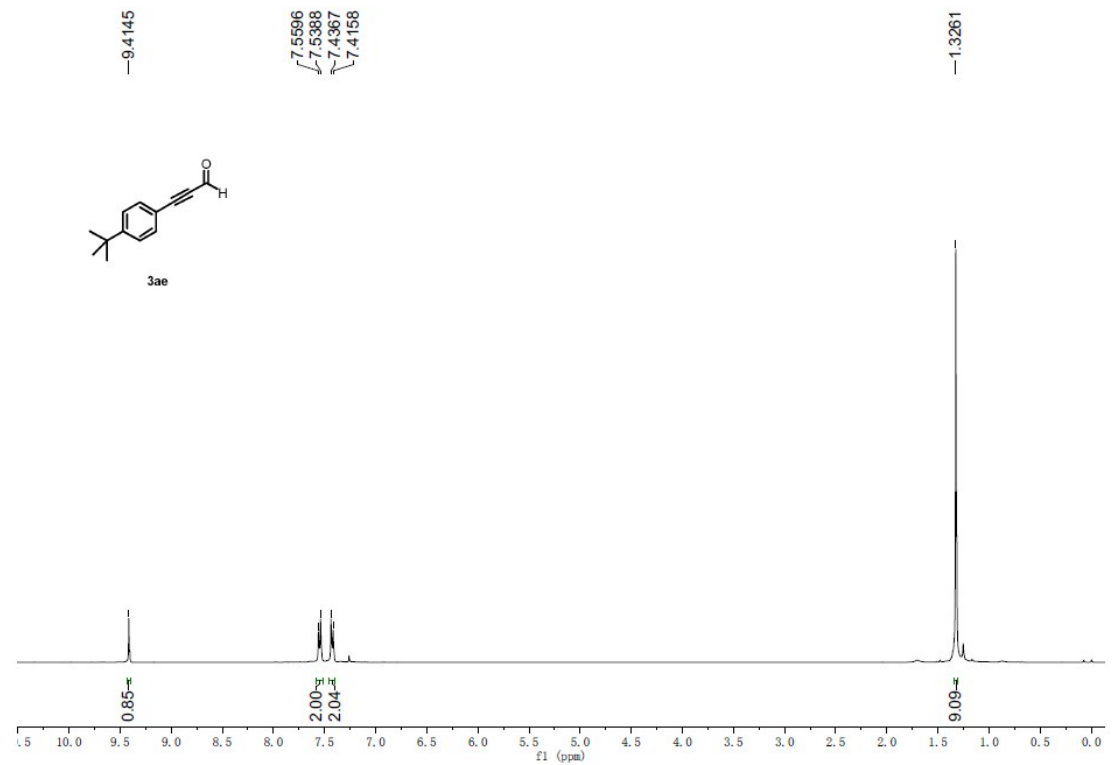

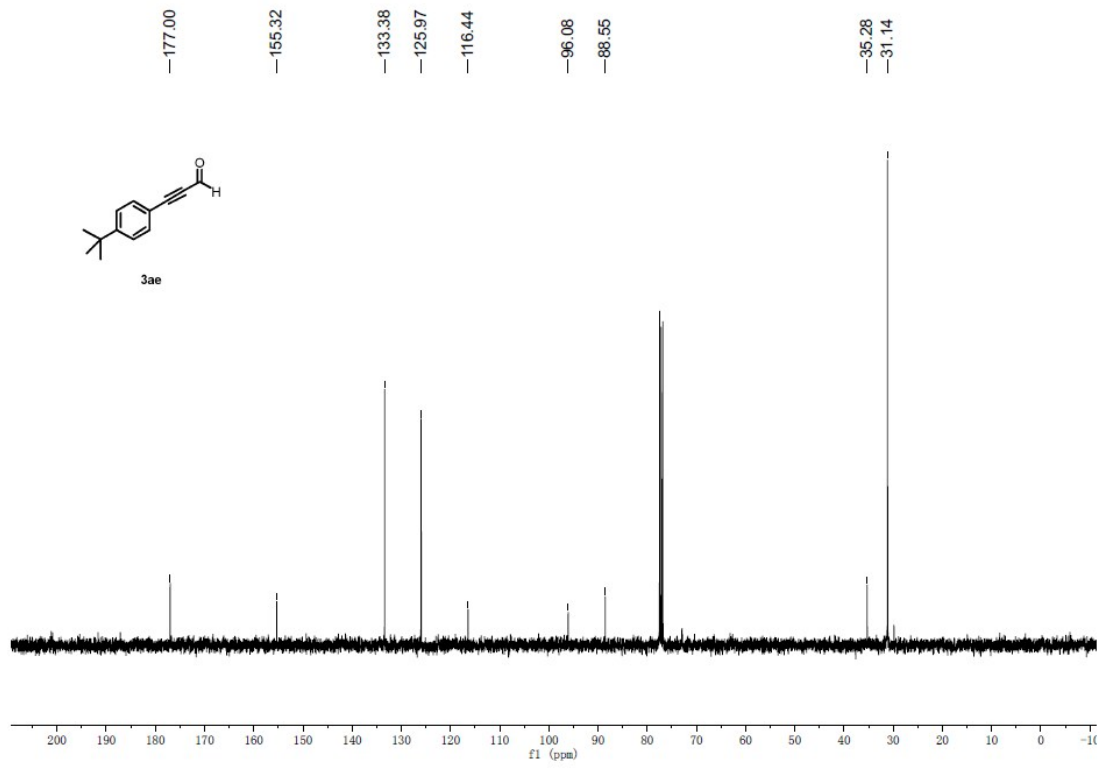

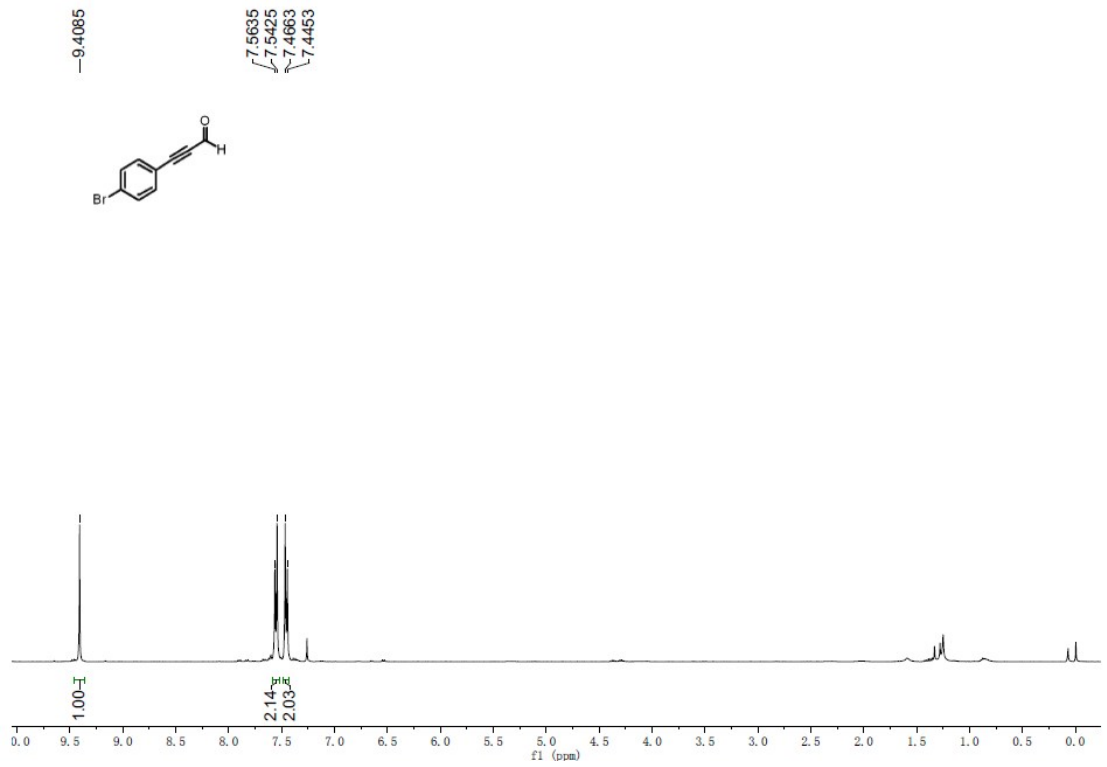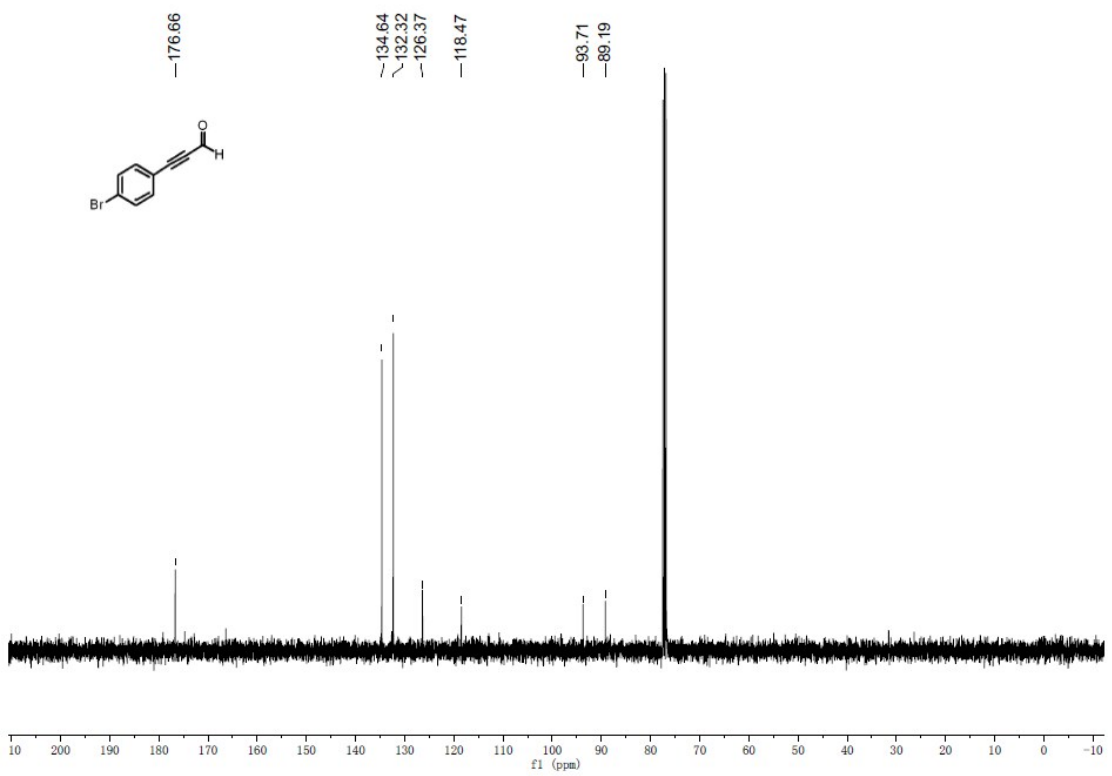

Supplement: c9ra06596b1.pdf [file c9ra06596b1.pdf]
